# Supplementary material
Source: PubMed Central journal article supplement (PMC10321022)

# Probing Catalyst Function – Electronic Modulation of Chiral Polyborate Anionic Catalysts.

Wynter, E. G. Osminski,<sup>†</sup> Zhenjie Lu,<sup>†</sup> Wenjun Zhao,<sup>†</sup> Aliakbar Mohammadlou,<sup>†</sup> Xiaopeng Yin,<sup>†</sup> Emily C. Matthews,<sup>†</sup> Virginia M. Canestraight,<sup>†</sup> Richard J. Staples,<sup>†</sup> Connor J. Allen,<sup>‡</sup> Jennifer S. Hirschi\*,<sup>‡</sup> and William D. Wulff\*<sup>†</sup>

<sup>†</sup>Department of Chemistry, Michigan State University, East Lansing, MI 48824

<sup>‡</sup>Department of Chemistry, Binghamton University, Binghamton, New York 139802

[wulff@chemistry.msu.edu](mailto:wulff@chemistry.msu.edu)

## Supporting Information

### Table of contents

|                                                                                                                                    |    |
|------------------------------------------------------------------------------------------------------------------------------------|----|
| I. Crystal Structure Determination of Aziridine <b>24</b> .....                                                                    | 2  |
| II. Hammett Analysis .....                                                                                                         | 12 |
| III. DFT calculations.....                                                                                                         | 16 |
| IV. <sup>1</sup> H and <sup>13</sup> C spectra for compounds <b>22a</b> , <b>22b</b> , <b>23a</b> , <b>23b</b> and <b>51</b> ..... | 53 |

## I. Crystal Structure Determination of aziridine 24.

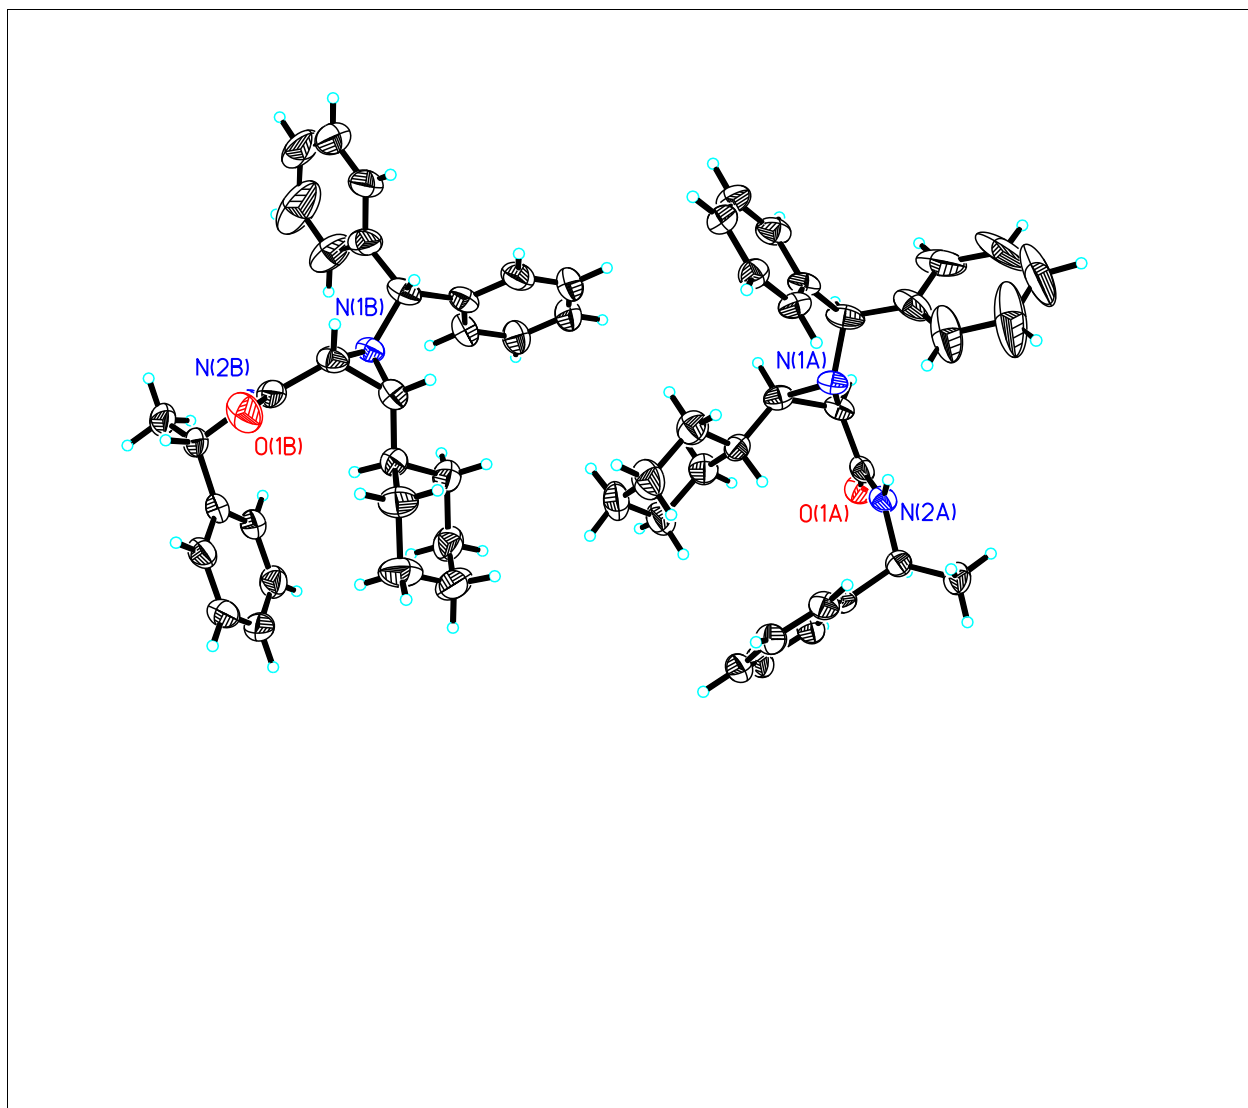

A colorless block crystal with dimensions 0.38 x 0.29 x 0.17 mm was mounted on a Nylon loop using very small amount of paratone oil.

Data were collected using a Bruker CCD (charge coupled device) based diffractometer equipped with an Oxford Cryostream low-temperature apparatus operating at 173 K. Data were measured using omega and phi scans of 1.0° per frame for 20 s. The total number of images was based on results from the program COSMO<sup>1</sup> where redundancy was expected to be 4.0 and completeness to 0.83 Å to 100%. Cell parameters were retrieved using APEX II software<sup>2</sup> and refined using SAINT on all observed reflections. Data reduction was performed using the SAINT software<sup>3</sup> which corrects for Lp. Scaling and absorption corrections were applied using SADABS<sup>4</sup> multi-scan technique, supplied by George Sheldrick. The structures are solved by the direct method using the SHELXS-97 program and refined by least squares method on F<sup>2</sup>, SHELXL- 97, which are incorporated in SHELXTL-PC V 6.10.<sup>5</sup>

The structure was solved in the space group P2<sub>1</sub>2<sub>1</sub>2<sub>1</sub> (# 19). All non-hydrogen atoms are refined anisotropically. Hydrogens were calculated by geometrical methods and refined as a riding model. The Flack<sup>6</sup> parameter is used to determine chirality of the crystal studied, the value should be near zero, a value of one is the other enantiomer and a value of 0.5 is racemic. The Flack parameter was refined to -0.1(3), confirming the absolute stereochemistry. All drawings are done at 50% ellipsoids.

## References

1. COSMO V1.61, *Software for the CCD Detector Systems for Determining Data Collection Parameters*. Bruker Analytical X-ray Systems, Madison, WI (2009).
2. APEX2 V2010.11-3. *Software for the CCD Detector System*; Bruker Analytical X-ray Systems, Madison, WI (2010).
3. SAINT V 7.68A *Software for the Integration of CCD Detector System* Bruker Analytical X-ray Systems, Madison, WI (2010).

4. SADABS V2008/2 Program for absorption corrections using Bruker-AXS CCD based on the method of Robert Blessing; Blessing, R.H. *Acta Cryst.* **A51**, 1995, 33-38.
5. Sheldrick, G.M. "A short history of SHELX". *Acta Cryst.* **A64**, 2008, 112-122.
6. Flack, H. D. *Acta Cryst.* **A39**, 1983, 876-881.

<sup>a</sup> Obtained with graphite monochromated Cu K $\alpha$  ( $\lambda = 1.54178\text{\AA}$ ) radiation.

$${}^b R_1 = \sum || F_o | - | F_c | / | F_o | \quad {}^c wR_2 = \{ [w(F_o^2 - F_c^2)^2 \cdot \sum [w(F_o^2)^2] \}^{1/2}$$

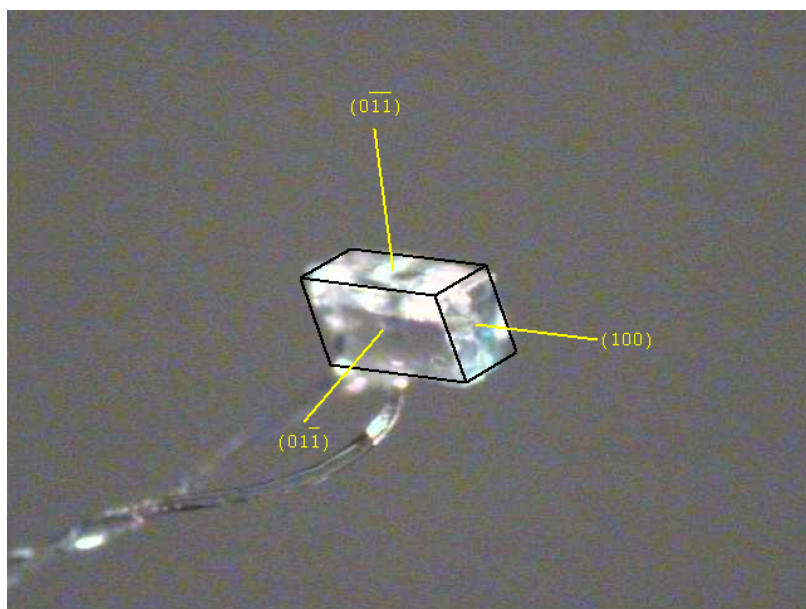

The following are 50% thermal ellipsoidal drawings of the molecule in the asymmetric cell with various amount of labeling.



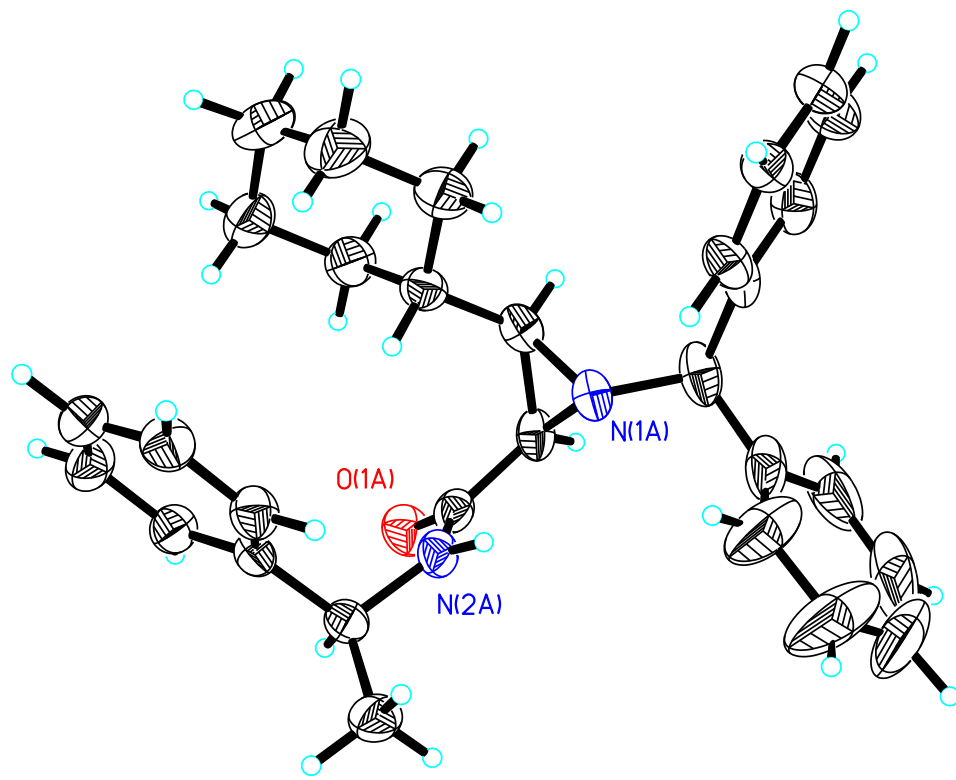

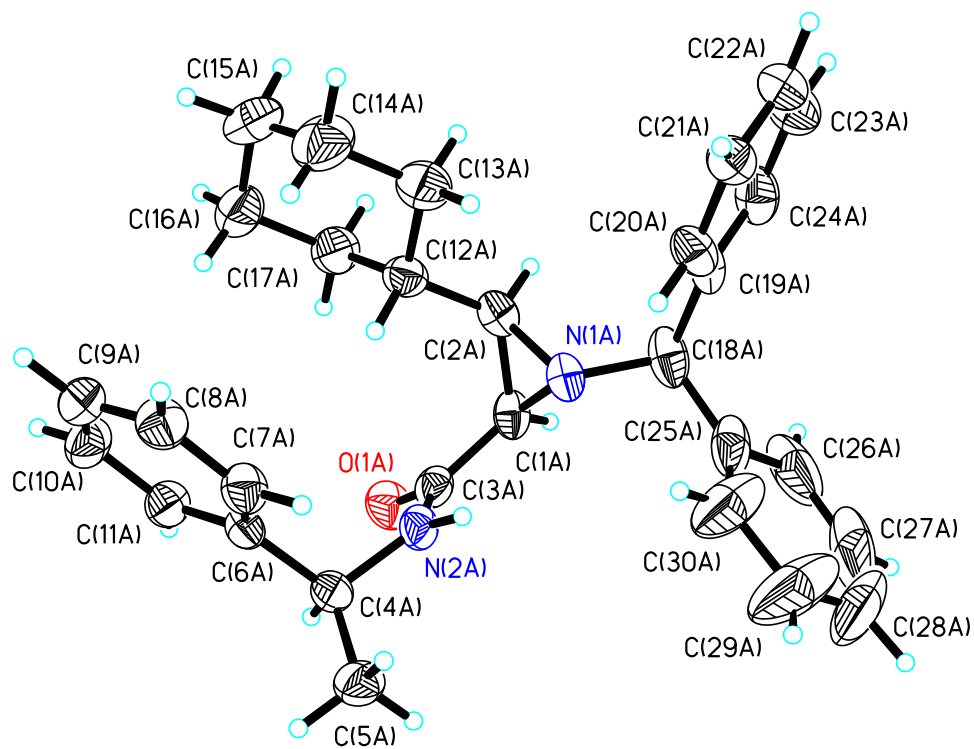

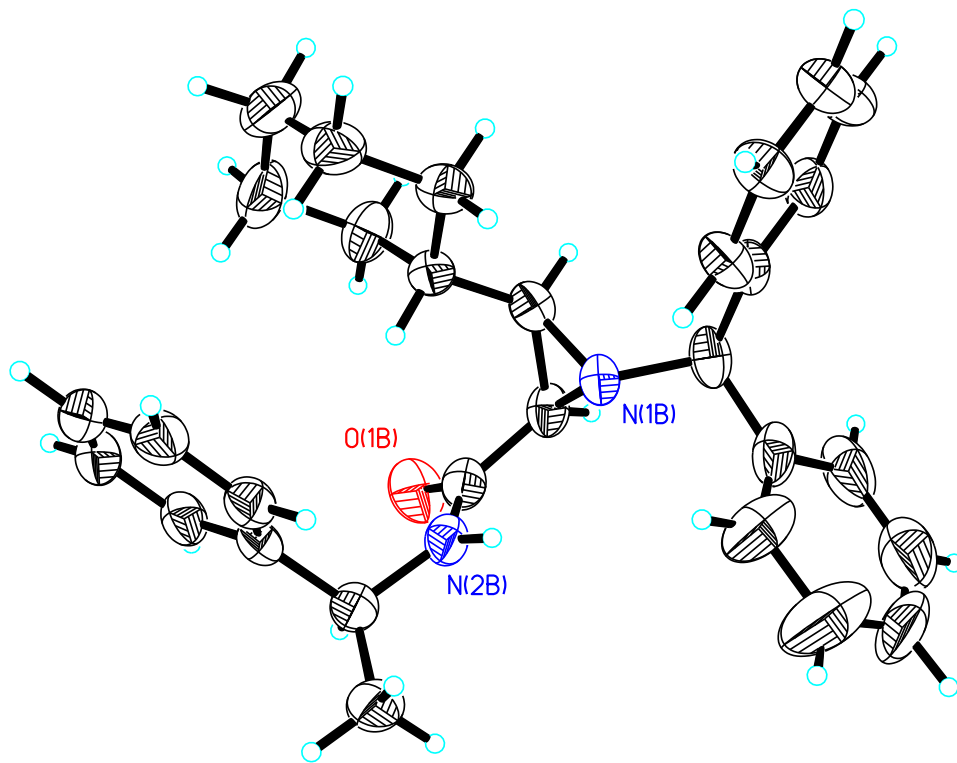

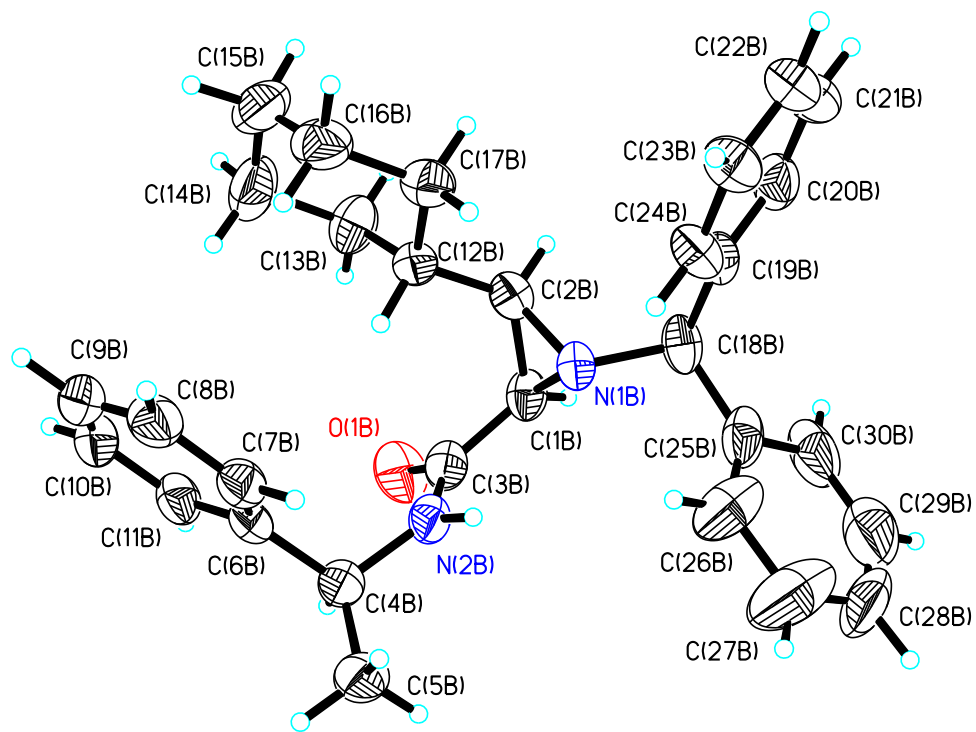

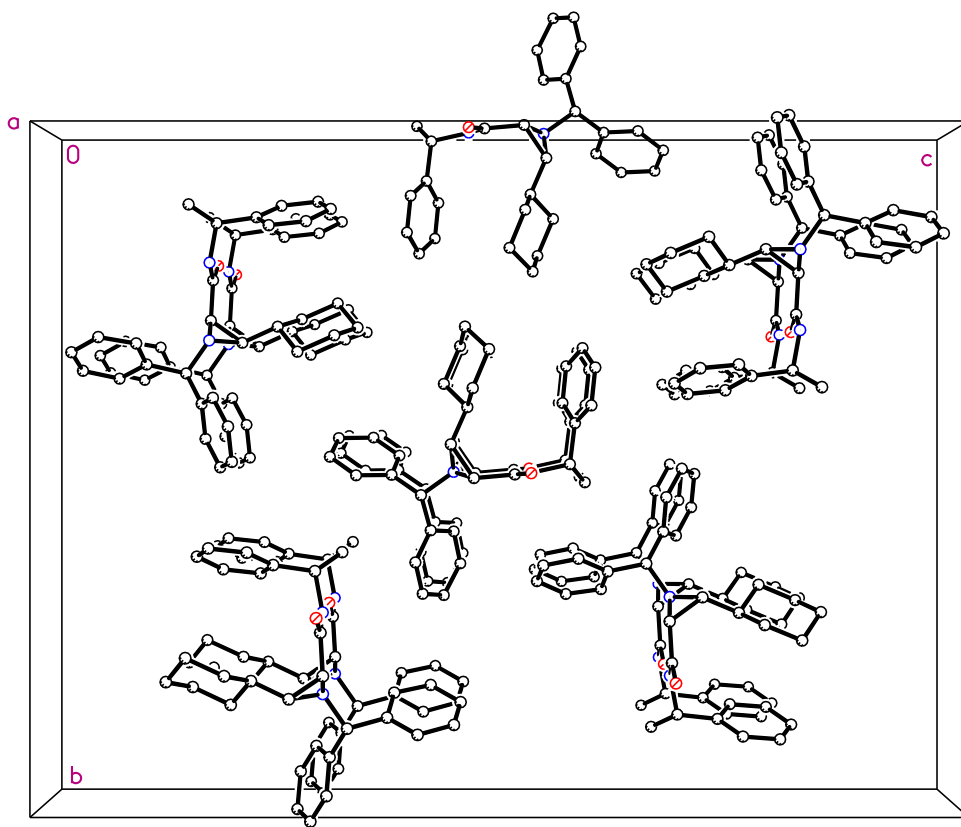

This is a drawing of the packing along the a-axis.

Table SI-1. Crystal data and structure refinement for 24.

|                                 |                                                  |          |
|---------------------------------|--------------------------------------------------|----------|
| Identification code             | 24                                               |          |
| Empirical formula               | C <sub>30</sub> H <sub>34</sub> N <sub>2</sub> O |          |
| Formula weight                  | 438.59                                           |          |
| Temperature                     | 172(2) K                                         |          |
| Wavelength                      | 1.54178 Å                                        |          |
| Crystal system                  | Orthorhombic                                     |          |
| Space group                     | P 21 21 21                                       |          |
| Unit cell dimensions            | a = 6.09190(10) Å                                | α = 90°. |
|                                 | b = 24.9451(2) Å                                 | β = 90°. |
|                                 | c = 33.6623(3) Å                                 | γ = 90°. |
| Volume                          | 5115.43(10) Å <sup>3</sup>                       |          |
| Z                               | 8                                                |          |
| Density (calculated)            | 1.139 Mg/m <sup>3</sup>                          |          |
| Absorption coefficient          | 0.527 mm <sup>-1</sup>                           |          |
| F(000)                          | 1888                                             |          |
| Crystal size                    | 0.38 x 0.29 x 0.17 mm <sup>3</sup>               |          |
| Theta range for data collection | 2.20 to 67.88°.                                  |          |
| Index ranges                    | -7 ≤ h ≤ 7, -29 ≤ k ≤ 29, -39 ≤ l ≤ 40           |          |
| Reflections collected           | 33702                                            |          |
| Independent reflections         | 9133 [R(int) = 0.0235]                           |          |
| Completeness to theta = 67.88°  | 99.3 %                                           |          |
| Absorption correction           | Semi-empirical from equivalents                  |          |
| Max. and min. transmission      | 0.9167 and 0.8241                                |          |
| Refinement method               | Full-matrix least-squares on F <sup>2</sup>      |          |

|                                      |                                    |
|--------------------------------------|------------------------------------|
| Data / restraints / parameters       | 9133 / 0 / 598                     |
| Goodness-of-fit on $F^2$             | 0.983                              |
| Final R indices [ $I > 2\sigma(I)$ ] | R1 = 0.0527, wR2 = 0.1427          |
| R indices (all data)                 | R1 = 0.0544, wR2 = 0.1448          |
| Absolute structure parameter         | -0.1(3)                            |
| Largest diff. peak and hole          | 0.430 and -0.353 e.Å <sup>-3</sup> |

## II. Hammett Analysis.

All of the data points collected for the Hammett analysis represent reactions that went to >95% completion. While some data points represent the average for reactions run more than once, most of the data points are from reactions with a single run.

### A. Various BOROX Catalysts in the Aziridination of the Phenyl Substituted Imine **22a**.

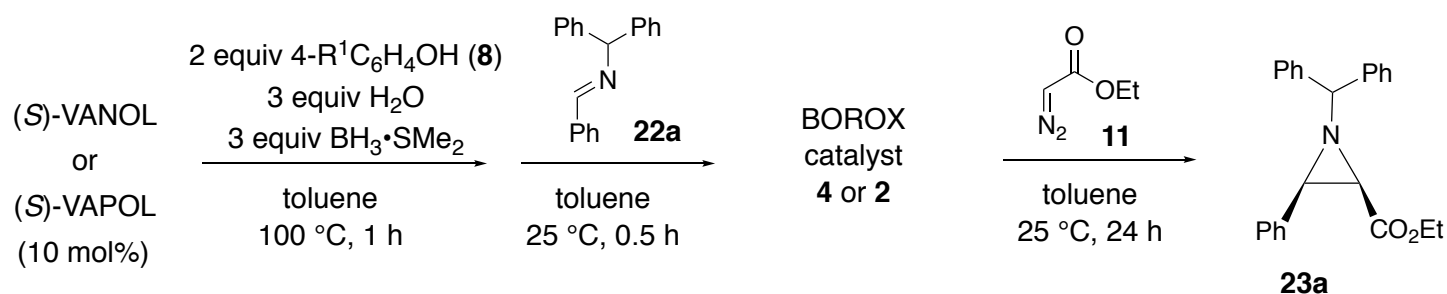

With the VANOL Ligand

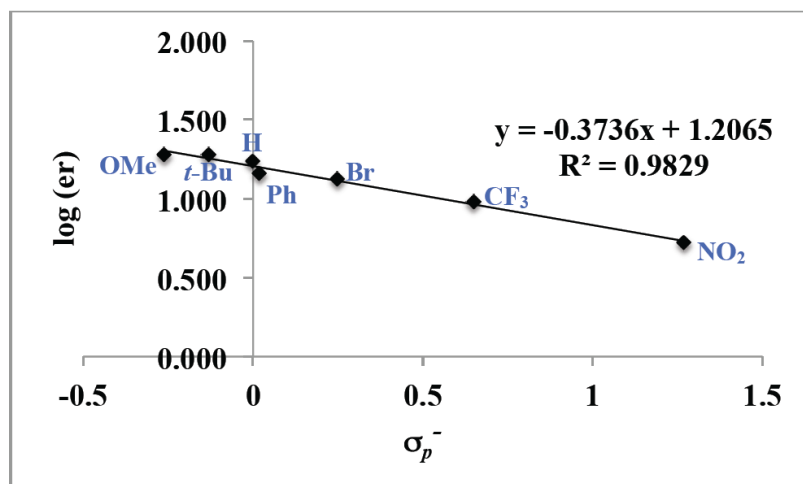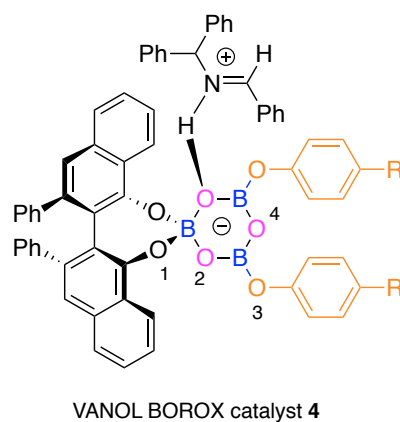



| R <sup>1</sup>                | % ee | er         | log er | $\sigma_p^-$ |
|-------------------------------|------|------------|--------|--------------|
| MeO                           | 90   | 95 : 5     | 1.279  | -0.26        |
| Me <sub>3</sub> C             | 90   | 95 : 5     | 1.279  | -0.13        |
| H                             | 89   | 94.5 : 5.5 | 1.235  | 0            |
| C <sub>6</sub> H <sub>5</sub> | 87   | 93.5 : 6.5 | 1.158  | 0.02         |
| Br                            | 86   | 93 : 7     | 1.123  | 0.25         |
| CF <sub>3</sub>               | 81   | 90.5 : 9.5 | 0.979  | 0.65         |
| NO <sub>2</sub>               | 68   | 84 : 16    | 0.720  | 1.27         |

With the VAPOL Ligand

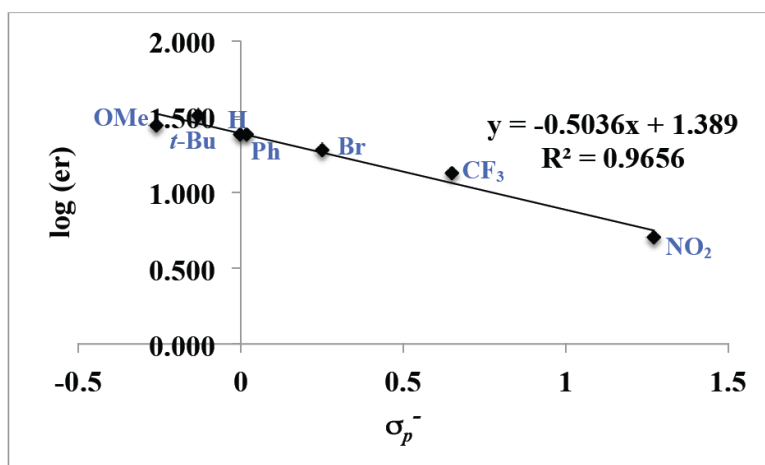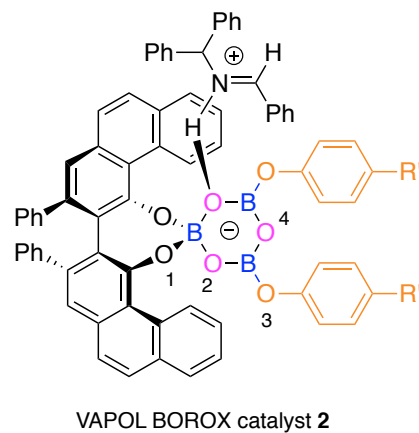

| R <sup>3</sup>                | % ee | er          | log er | $\sigma_p^-$ |
|-------------------------------|------|-------------|--------|--------------|
| MeO                           | 93   | 96.5 : 3.5  | 1.440  | -0.26        |
| Me <sub>3</sub> C             | 94   | 97 : 3      | 1.510  | -0.13        |
| H                             | 92   | 96 : 4      | 1.380  | 0            |
| C <sub>6</sub> H <sub>5</sub> | 92   | 96 : 4      | 1.380  | 0.02         |
| Br                            | 90   | 95 : 5      | 1.279  | 0.25         |
| CF <sub>3</sub>               | 86   | 93 : 7      | 1.123  | 0.65         |
| NO <sub>2</sub>               | 67   | 83.5 : 16.5 | 0.704  | 1.27         |

**B. Various BOROX Catalysts in the Aziridination of the Cyclohexyl Substituted Imine **22b**.**

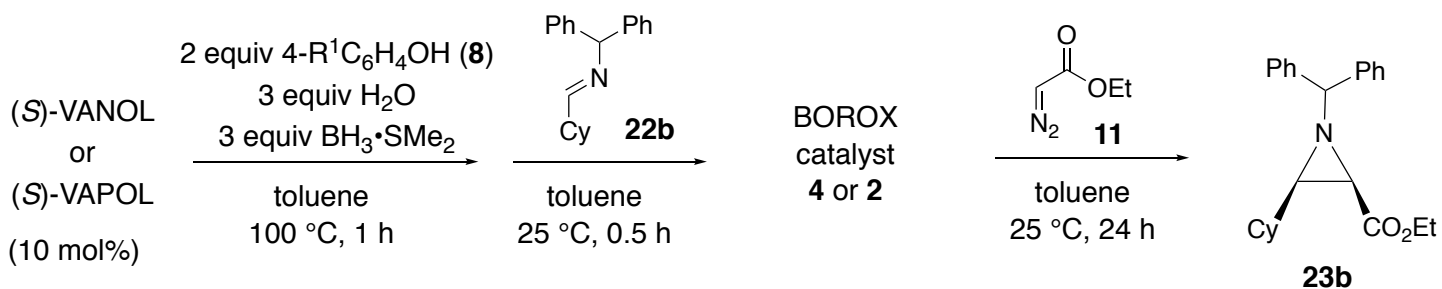

With the VANOL Ligand

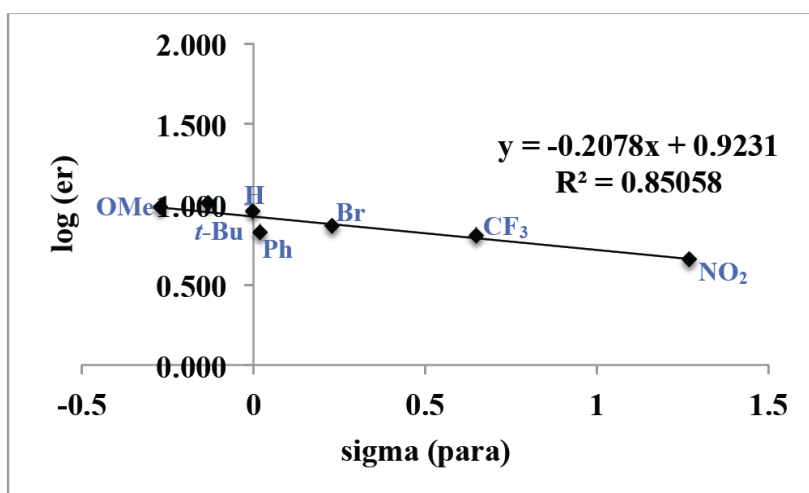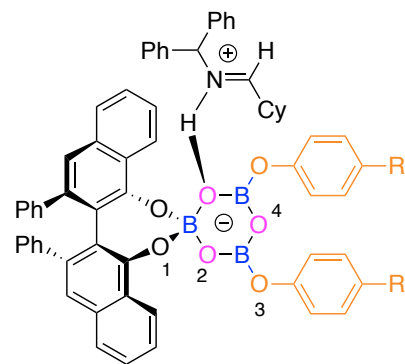

VANOL BOROX catalyst **4**

| R <sup>1</sup>                | % ee | er          | log er | σ <sub>p</sub> <sup>-</sup> |
|-------------------------------|------|-------------|--------|-----------------------------|
| MeO                           | 81   | 90.5 : 9.5  | 0.979  | -0.26                       |
| Me <sub>3</sub> C             | 82   | 91 : 9      | 1.005  | -0.13                       |
| H                             | 79   | 89.5 : 10.5 | 0.931  | 0                           |
| C <sub>6</sub> H <sub>5</sub> | 74   | 87 : 13     | 0.826  | 0.02                        |
| Br                            | 80   | 90 : 10     | 0.954  | 0.25                        |
| CF <sub>3</sub>               | 73   | 86.5 : 13.5 | 0.807  | 0.65                        |
| NO <sub>2</sub>               | 64   | 82 : 18     | 0.659  | 1.27                        |

With the VAPOL Ligand

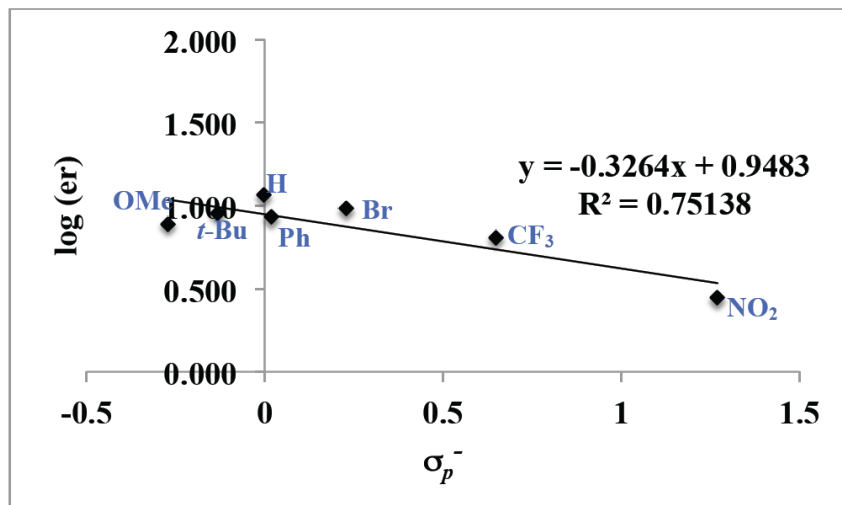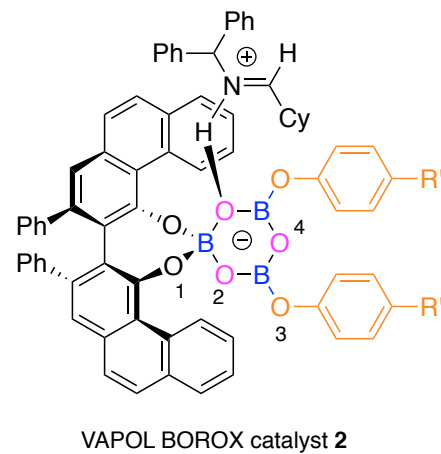

| R <sup>3</sup>                | % ee | er          | log er | $\sigma_p^-$ |
|-------------------------------|------|-------------|--------|--------------|
| MeO                           | 77   | 88.5 : 11.5 | 0.886  | -0.26        |
| Me <sub>3</sub> C             | 80   | 90 : 10     | 0.954  | -0.13        |
| H                             | 74   | 87 : 13     | 0.826  | 0            |
| C <sub>6</sub> H <sub>5</sub> | 79   | 89.5 : 10.5 | 0.931  | 0.02         |
| Br                            | 76   | 88 : 12     | 0.865  | 0.25         |
| CF <sub>3</sub>               | 73   | 86.5 : 13.5 | 0.807  | 0.65         |
| NO <sub>2</sub>               | 67   | 83.5 : 16.5 | 0.704  | 1.27         |

### III. DFT Calculations

#### **Catalyst Structures Used for ADCH Charge Analysis:**

Optimizations of catalyst-borox complexes were carried out at the M06-2X/6-31G\* level of theory as implemented by the Gaussian 16 software package with bulk solvent effects accounted for by the self-consistent reaction field polarizable continuum model (PCM) as implemented for toluene.

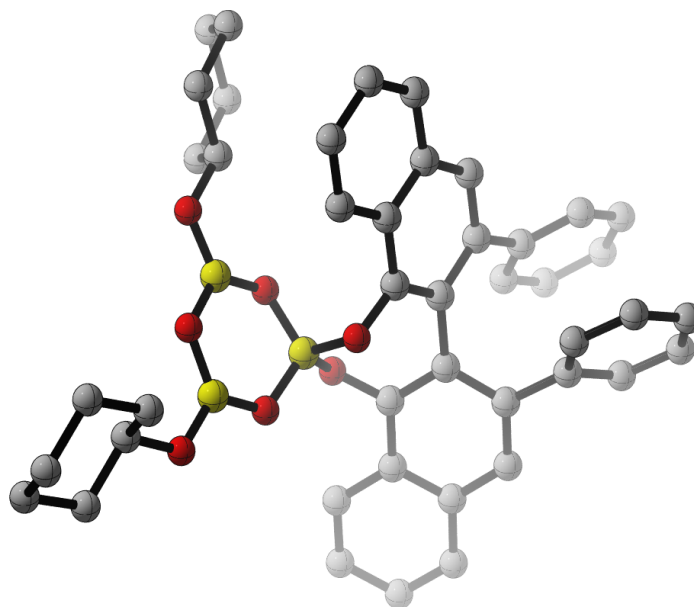

Entry 1

Filename: cat1

RRHO Thermochemistry (T = 298)

|                                                     |                             |
|-----------------------------------------------------|-----------------------------|
| Zero-point correction (RRHO)=                       | 0.794775 (Hartree/Particle) |
| Thermal correction to Energy (RRHO)=                | 0.837485                    |
| Thermal correction to Enthalpy (RRHO)=              | 0.838429                    |
| Thermal correction to Gibbs Free Energy (RRHO)=     | 0.718671                    |
| Sum of electronic and zero-point Energies (RRHO)=   | -2302.086172                |
| Sum of electronic and thermal Energies (RRHO)=      | -2302.043462                |
| Sum of electronic and thermal Enthalpies (RRHO)=    | -2302.042518                |
| Sum of electronic and thermal Free Energies (RRHO)= | -2302.162276                |

Quasi-RRHO Thermochemistry (T = 298,  $\nu_0 = 100 \text{ cm}^{-1}$ )

|                                |                             |
|--------------------------------|-----------------------------|
| Zero-point correction (QRRHO)= | 0.794775 (Hartree/Particle) |
|--------------------------------|-----------------------------|

Thermal correction to Energy (QRRHO)= 0.837485  
 Thermal correction to Enthalpy (QRRHO)= 0.838429  
 Thermal correction to Gibbs Free Energy (QRRHO)= 0.727905  
 Sum of electronic and zero-point Energies (QRRHO)= -2302.086172  
 Sum of electronic and thermal Energies (QRRHO)= -2302.043462  
 Sum of electronic and thermal Enthalpies (QRRHO)= -2302.042518  
 Sum of electronic and thermal Free Energies (QRRHO)= -2302.153042

Quasi-harmonic Thermochemistry (T = 298, cutoff = 100 cm-1)

Zero-point correction (QHO)= 0.794775 (Hartree/Particle)  
 Thermal correction to Energy (QHO)= 0.837673  
 Thermal correction to Enthalpy (QHO)= 0.838429  
 Thermal correction to Gibbs Free Energy (QHO)= 0.729412  
 Sum of electronic and zero-point Energies (QHO)= -2302.086172  
 Sum of electronic and thermal Energies (QHO)= -2302.043274  
 Sum of electronic and thermal Enthalpies (QHO)= -2302.042518  
 Sum of electronic and thermal Free Energies (QHO)= -2302.151535

|   |            |            |            |   |            |            |            |
|---|------------|------------|------------|---|------------|------------|------------|
| C | 4.2345540  | 0.4294230  | -1.4977680 | C | 5.4584960  | -1.5469740 | 1.2280170  |
| C | 4.0414770  | 1.1147040  | -0.2918330 | O | -2.0573240 | -1.7520770 | -0.3733550 |
| C | 5.1570700  | 1.6623690  | 0.3521640  | B | -3.3381750 | -1.4025860 | -0.1434480 |
| C | 6.4322490  | 1.5243470  | -0.1860390 | O | -3.7773970 | -0.0855470 | -0.2435990 |
| C | 6.6146640  | 0.8333340  | -1.3814020 | B | -2.8871420 | 0.8558490  | -0.7466630 |
| C | 5.5101840  | 0.2892690  | -2.0355200 | O | -3.3749540 | 2.1303430  | -0.8997160 |
| C | 2.6848510  | 1.2977990  | 0.2918090  | O | -4.2493350 | -2.3783220 | 0.1865560  |
| C | 1.7239110  | 0.2335620  | 0.3514290  | O | -1.6197930 | 0.5259120  | -1.0647090 |
| C | 0.4491890  | 0.5090440  | 0.8274830  | H | -0.0498490 | -5.4562710 | -3.4767570 |
| C | 0.0959380  | 1.8076230  | 1.3065830  | H | -1.9193960 | 1.2622710  | 1.8429910  |
| C | 1.0605310  | 2.8452850  | 1.2580860  | H | -0.8602160 | 5.3869970  | 2.4883730  |
| C | 2.3470490  | 2.5568680  | 0.7400270  | H | 1.4179570  | 4.9453220  | 1.6404150  |
| C | 0.6835190  | 4.1448530  | 1.6916230  | H | 3.0677350  | 3.3661270  | 0.6522730  |
| C | -0.5834460 | 4.3880950  | 2.1627390  | H | 5.0209590  | 2.1624080  | 1.3072800  |
| C | -1.5354670 | 3.3405520  | 2.2298800  | H | 7.2866500  | 1.9415920  | 0.3395300  |
| C | -1.2031860 | 2.0774480  | 1.8058700  | H | 7.6098190  | 0.7177490  | -1.8010230 |
| C | 1.9975870  | -1.1687090 | -0.0724380 | H | 5.6406250  | -0.2448270 | -2.9722530 |
| C | 1.0999560  | -1.7723810 | -0.9494080 | H | 3.3773170  | 0.0060870  | -2.0124790 |
| C | 1.3295110  | -3.0985480 | -1.4387000 | H | 5.8231490  | -2.0010060 | 0.3105730  |
| C | 2.4897250  | -3.8012230 | -1.0267020 | H | 7.4262260  | -1.1988600 | 2.0149510  |
| C | 3.3686140  | -3.1856410 | -0.1028980 | H | 6.5951930  | -0.0741800 | 4.0713190  |
| C | 3.1349290  | -1.9177270 | 0.3818020  | H | 4.1491090  | 0.1982530  | 4.4160330  |
| C | 0.4160180  | -3.7170720 | -2.3285630 | H | 2.5543150  | -0.6372170 | 2.7233850  |
| C | 0.6556430  | -4.9847770 | -2.7990880 | H | 4.2189420  | -3.7524650 | 0.2677440  |
| C | 1.8174870  | -5.6881380 | -2.3977660 | H | 3.5993470  | -5.6489630 | -1.2096140 |
| C | 2.7099470  | -5.1110730 | -1.5294420 | H | 1.9964270  | -6.6909260 | -2.7753290 |
| O | 0.0297430  | -1.1234590 | -1.4290570 | H | -0.4715880 | -3.1637180 | -2.6133110 |
| B | -1.0550540 | -0.7095790 | -0.5223630 | H | -2.5327880 | 3.5430240  | 2.6091360  |
| O | -0.4955310 | -0.4456540 | 0.8345540  | C | -5.5902720 | -2.0347100 | 0.4899680  |
| C | 4.0788190  | -1.3882150 | 1.4039560  | C | -6.4499480 | -3.2795090 | 0.2973010  |
| C | 3.6221220  | -0.7580360 | 2.5682040  | C | -5.6997630 | -1.5147490 | 1.9223430  |
| C | 4.5223640  | -0.2881580 | 3.5194640  | H | -5.9363210 | -1.2463080 | -0.1946460 |
| C | 5.8944030  | -0.4455080 | 3.3291220  | C | -7.9095280 | -3.0077820 | 0.6701420  |
| C | 6.3588970  | -1.0815940 | 2.1805080  | H | -6.0422620 | -4.0759360 | 0.9350270  |

|   |            |            |            |   |            |           |            |
|---|------------|------------|------------|---|------------|-----------|------------|
| H | -6.3631810 | -3.6214490 | -0.7398750 | H | -1.5010710 | 2.9922610 | -0.7928080 |
| C | -7.1570420 | -1.2376190 | 2.3005740  | C | -1.3157600 | 4.2774950 | -3.2247700 |
| H | -5.2751880 | -2.2760740 | 2.5914150  | H | -3.2181460 | 3.2361450 | -3.2969160 |
| H | -5.0900380 | -0.6106130 | 2.0221280  | H | -1.8216780 | 2.1640150 | -3.0823280 |
| C | -8.0236170 | -2.4846090 | 2.1048320  | C | -2.1111010 | 5.6392670 | -1.2542570 |
| H | -8.5070720 | -3.9175520 | 0.5444990  | H | -4.0274810 | 4.6218870 | -1.3049810 |
| H | -8.3258630 | -2.2583870 | -0.0177090 | H | -3.1830010 | 4.4762080 | 0.2429200  |
| H | -7.2187030 | -0.8859230 | 3.3363400  | C | -1.8633400 | 5.6320000 | -2.7658170 |
| H | -7.5460780 | -0.4272720 | 1.6683250  | H | -1.1752400 | 4.2688110 | -4.3114760 |
| H | -9.0695890 | -2.2664940 | 2.3492660  | H | -0.3254000 | 4.1190250 | -2.7760740 |
| H | -7.6888950 | -3.2673320 | 2.7999350  | H | -2.5323970 | 6.6009110 | -0.9393910 |
| C | -2.4679950 | 3.1539420  | -1.2914660 | H | -1.1518690 | 5.5239830 | -0.7296910 |
| C | -2.2420830 | 3.1343380  | -2.8008260 | H | -1.1732320 | 6.4372140 | -3.0435020 |
| C | -3.0382910 | 4.4932740  | -0.8428320 | H | -2.8118370 | 5.8306820 | -3.2850600 |

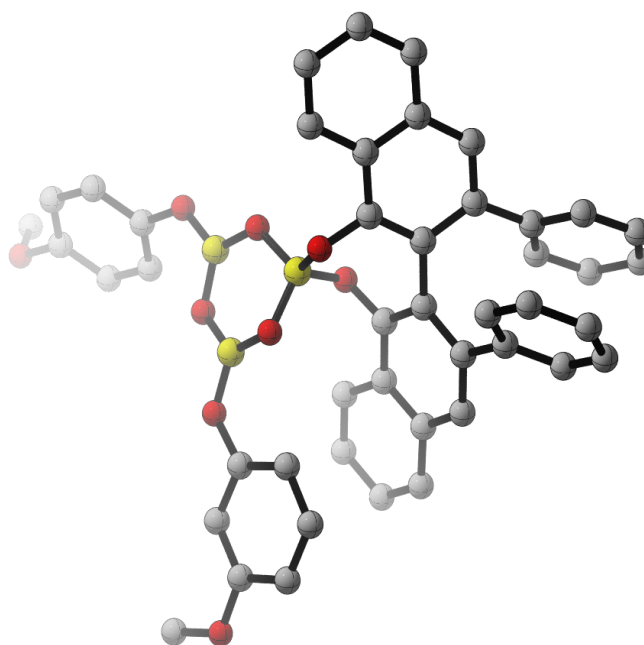

## Entry 2

File Name: cat2

RRHO Thermochemistry (T = 298)

|                                                   |                             |
|---------------------------------------------------|-----------------------------|
| Zero-point correction (RRHO)=                     | 0.717966 (Hartree/Particle) |
| Thermal correction to Energy (RRHO)=              | 0.763649                    |
| Thermal correction to Enthalpy (RRHO)=            | 0.764593                    |
| Thermal correction to Gibbs Free Energy (RRHO)=   | 0.635302                    |
| Sum of electronic and zero-point Energies (RRHO)= | -2523.887478                |

|                                                     |              |
|-----------------------------------------------------|--------------|
| Sum of electronic and thermal Energies (RRHO)=      | -2523.841795 |
| Sum of electronic and thermal Enthalpies (RRHO)=    | -2523.840851 |
| Sum of electronic and thermal Free Energies (RRHO)= | -2523.970142 |

Quasi-RRHO Thermochemistry (T = 298,  $\nu_0 = 100 \text{ cm}^{-1}$ )

|                                                      |                             |
|------------------------------------------------------|-----------------------------|
| Zero-point correction (QRRHO)=                       | 0.717966 (Hartree/Particle) |
| Thermal correction to Energy (QRRHO)=                | 0.763649                    |
| Thermal correction to Enthalpy (QRRHO)=              | 0.764593                    |
| Thermal correction to Gibbs Free Energy (QRRHO)=     | 0.646839                    |
| Sum of electronic and zero-point Energies (QRRHO)=   | -2523.887478                |
| Sum of electronic and thermal Energies (QRRHO)=      | -2523.841795                |
| Sum of electronic and thermal Enthalpies (QRRHO)=    | -2523.840851                |
| Sum of electronic and thermal Free Energies (QRRHO)= | -2523.958605                |

Quasi-harmonic Thermochemistry (T = 298, cutoff =  $100 \text{ cm}^{-1}$ )

|                                                    |                             |
|----------------------------------------------------|-----------------------------|
| Zero-point correction (QHO)=                       | 0.717966 (Hartree/Particle) |
| Thermal correction to Energy (QHO)=                | 0.763859                    |
| Thermal correction to Enthalpy (QHO)=              | 0.764593                    |
| Thermal correction to Gibbs Free Energy (QHO)=     | 0.649624                    |
| Sum of electronic and zero-point Energies (QHO)=   | -2523.887478                |
| Sum of electronic and thermal Energies (QHO)=      | -2523.841585                |
| Sum of electronic and thermal Enthalpies (QHO)=    | -2523.840851                |
| Sum of electronic and thermal Free Energies (QHO)= | -2523.955820                |

|   |            |            |            |   |            |            |            |
|---|------------|------------|------------|---|------------|------------|------------|
| C | 4.6530830  | 0.5025010  | -1.4921550 | C | 1.5754310  | -5.2509060 | -2.6624920 |
| C | 4.3815870  | 1.1998340  | -0.3084300 | C | 2.7810450  | -5.8380820 | -2.2064980 |
| C | 5.4376280  | 1.8457750  | 0.3445780  | C | 3.5998640  | -5.1551850 | -1.3425310 |
| C | 6.7316740  | 1.7898370  | -0.1621060 | O | 0.6062550  | -1.3997990 | -1.4800050 |
| C | 6.9933690  | 1.0835210  | -1.3335630 | B | -0.5235250 | -1.0131840 | -0.6325020 |
| C | 5.9481760  | 0.4428140  | -1.9974980 | O | -0.0540950 | -0.6795540 | 0.7347770  |
| C | 3.0031500  | 1.2901550  | 0.2439920  | C | 4.5722300  | -1.2280010 | 1.4786510  |
| C | 2.1253900  | 0.1554020  | 0.3055750  | C | 4.0296900  | -0.5999000 | 2.6065530  |
| C | 0.8218900  | 0.3439310  | 0.7420110  | C | 4.8591350  | -0.0309720 | 3.5681460  |
| C | 0.3564440  | 1.6184050  | 1.1868850  | C | 6.2448190  | -0.0831800 | 3.4235200  |
| C | 1.2426030  | 2.7236940  | 1.1494550  | C | 6.7948660  | -0.7140470 | 2.3102990  |
| C | 2.5593280  | 2.5252060  | 0.6641940  | C | 5.9649070  | -1.2793200 | 1.3478750  |
| C | 0.7589520  | 3.9979190  | 1.5471000  | O | -1.4953260 | -2.0937890 | -0.4987300 |
| C | -0.5403210 | 4.1581980  | 1.9596890  | B | -2.7855230 | -1.7782470 | -0.3173520 |
| C | -1.4178600 | 3.0481610  | 2.0040410  | O | -3.2717590 | -0.4872370 | -0.4438860 |
| C | -0.9772200 | 1.8029290  | 1.6293310  | B | -2.4014120 | 0.4764220  | -0.9387550 |
| C | 2.5249430  | -1.2331050 | -0.0628050 | O | -2.9816160 | 1.7236160  | -1.0945020 |
| C | 1.7094630  | -1.9416960 | -0.9395830 | C | -2.3583760 | 2.9168410  | -1.3188760 |
| C | 2.0571560  | -3.2624670 | -1.3681360 | C | -0.9966720 | 3.0725410  | -1.5735500 |
| C | 3.2587330  | -3.8500200 | -0.8989160 | C | -0.4999070 | 4.3652280  | -1.7461090 |
| C | 4.0578040  | -3.1282010 | 0.0201660  | C | -1.3205260 | 5.4816010  | -1.6877070 |
| C | 3.7064940  | -1.8679380 | 0.4503620  | C | -2.6862090 | 5.3069470  | -1.4430900 |
| C | 1.2199810  | -3.9899650 | -2.2506900 | C | -3.2071800 | 4.0299390  | -1.2589360 |

|   |            |            |            |   |             |            |            |
|---|------------|------------|------------|---|-------------|------------|------------|
| O | -3.6683550 | -2.8052080 | -0.0111990 | H | 8.0041530   | 1.0318560  | -1.7277920 |
| C | -4.9898900 | -2.6417130 | 0.2796460  | H | 6.1400630   | -0.1028400 | -2.9167610 |
| C | -5.8873530 | -3.5663340 | -0.2556450 | H | 3.8416950   | 0.0058320  | -2.0155900 |
| C | -7.2402050 | -3.4922270 | 0.0585230  | H | 6.3935880   | -1.7298980 | 0.4568930  |
| C | -7.6999060 | -2.4878220 | 0.9052390  | H | 7.8727650   | -0.7496550 | 2.1793460  |
| C | -6.8065550 | -1.5653090 | 1.4439300  | H | 6.8898050   | 0.3656490  | 4.1733730  |
| C | -5.4524260 | -1.6398140 | 1.1363250  | H | 4.4199270   | 0.4516400  | 4.4364280  |
| O | -1.1308900 | 0.1823800  | -1.2405250 | H | 2.9511450   | -0.5595230 | 2.7257450  |
| H | 0.9281690  | -5.8070640 | -3.3340760 | H | 4.9417020   | -3.6079610 | 0.4328610  |
| H | -1.6347450 | 0.9391240  | 1.6597860  | H | 4.5218190   | -5.6036680 | -0.9801360 |
| H | -5.5045970 | -4.3384420 | -0.9150030 | H | 3.0521330   | -6.8361770 | -2.5386610 |
| H | -7.9507820 | -4.2017640 | -0.3548820 | H | 0.2939410   | -3.5260630 | -2.5722620 |
| H | -7.1843580 | -0.7857970 | 2.0991090  | H | -2.4458220  | 3.1880600  | 2.3249690  |
| H | -4.7517390 | -0.9199730 | 1.5429140  | O | -3.4361750  | 6.4470440  | -1.3986830 |
| H | -4.2565340 | 3.8517370  | -1.0583930 | O | -9.0457550  | -2.4006770 | 1.2003910  |
| H | -0.9367990 | 6.4870200  | -1.8235370 | C | -4.8195800  | 6.3002310  | -1.1671590 |
| H | 0.5637970  | 4.4960310  | -1.9252000 | H | -5.0152400  | 5.8317870  | -0.1950740 |
| H | -0.3447270 | 2.2107750  | -1.6131940 | H | -5.2386590  | 7.3068430  | -1.1748090 |
| H | -0.9033460 | 5.1414910  | 2.2440530  | H | -5.2948460  | 5.7012260  | -1.9531680 |
| H | 1.4345330  | 4.8490990  | 1.5037780  | C | -9.3917090  | -3.0927280 | 2.3876130  |
| H | 3.2177260  | 3.3862680  | 0.5776330  | H | -10.4657550 | -2.9622590 | 2.5316430  |
| H | 5.2424080  | 2.3560370  | 1.2838360  | H | -9.1607130  | -4.1619380 | 2.3009450  |
| H | 7.5400960  | 2.2826980  | 0.3705970  | H | -8.8544040  | -2.6853940 | 3.2532100  |

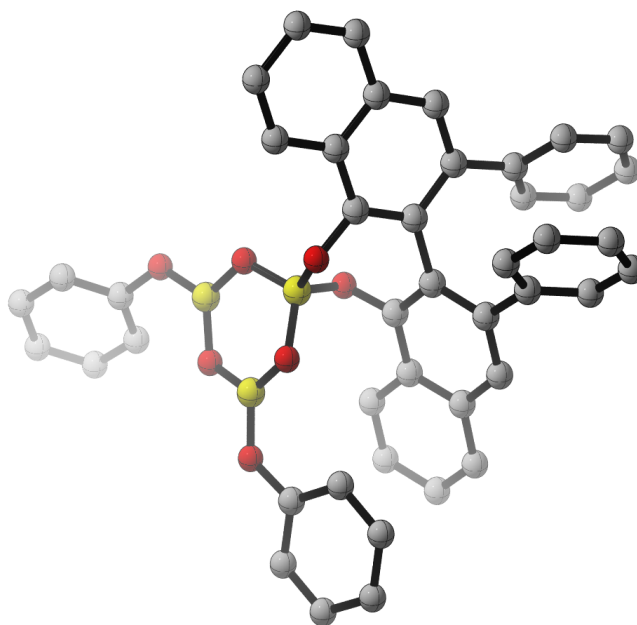

Entry 3



File Name: cat3

RRHO Thermochemistry (T = 298)

|                                                     |                             |
|-----------------------------------------------------|-----------------------------|
| Zero-point correction (RRHO)=                       | 0.652350 (Hartree/Particle) |
| Thermal correction to Energy (RRHO)=                | 0.692509                    |
| Thermal correction to Enthalpy (RRHO)=              | 0.693452                    |
| Thermal correction to Gibbs Free Energy (RRHO)=     | 0.578328                    |
| Sum of electronic and zero-point Energies (RRHO)=   | -2295.001058                |
| Sum of electronic and thermal Energies (RRHO)=      | -2294.960899                |
| Sum of electronic and thermal Enthalpies (RRHO)=    | -2294.959956                |
| Sum of electronic and thermal Free Energies (RRHO)= | -2295.075080                |

Quasi-RRHO Thermochemistry (T = 298,  $\nu_0 = 100 \text{ cm}^{-1}$ )

|                                                      |                             |
|------------------------------------------------------|-----------------------------|
| Zero-point correction (QRRHO)=                       | 0.652350 (Hartree/Particle) |
| Thermal correction to Energy (QRRHO)=                | 0.692509                    |
| Thermal correction to Enthalpy (QRRHO)=              | 0.693452                    |
| Thermal correction to Gibbs Free Energy (QRRHO)=     | 0.587252                    |
| Sum of electronic and zero-point Energies (QRRHO)=   | -2295.001058                |
| Sum of electronic and thermal Energies (QRRHO)=      | -2294.960899                |
| Sum of electronic and thermal Enthalpies (QRRHO)=    | -2294.959956                |
| Sum of electronic and thermal Free Energies (QRRHO)= | -2295.066156                |

Quasi-harmonic Thermochemistry (T = 298, cutoff =  $100 \text{ cm}^{-1}$ )

|                                                    |                             |
|----------------------------------------------------|-----------------------------|
| Zero-point correction (QHO)=                       | 0.652350 (Hartree/Particle) |
| Thermal correction to Energy (QHO)=                | 0.692679                    |
| Thermal correction to Enthalpy (QHO)=              | 0.693452                    |
| Thermal correction to Gibbs Free Energy (QHO)=     | 0.588896                    |
| Sum of electronic and zero-point Energies (QHO)=   | -2295.001058                |
| Sum of electronic and thermal Energies (QHO)=      | -2294.960729                |
| Sum of electronic and thermal Enthalpies (QHO)=    | -2294.959956                |
| Sum of electronic and thermal Free Energies (QHO)= | -2295.064512                |

|   |            |           |            |   |            |            |            |
|---|------------|-----------|------------|---|------------|------------|------------|
| C | 3.9963290  | 0.3586370 | -1.7026090 | C | -1.7976560 | 3.5046830  | 1.7650370  |
| C | 3.8120770  | 1.1937600 | -0.5936640 | C | -1.4157540 | 2.2082060  | 1.5225260  |
| C | 4.9207860  | 1.8749630 | -0.0777470 | C | 1.8982280  | -1.1282000 | 0.0160400  |
| C | 6.1812990  | 1.7215890 | -0.6456960 | C | 1.0160760  | -1.8952430 | -0.7386660 |
| C | 6.3557820  | 0.8801050 | -1.7417130 | C | 1.3108500  | -3.2593540 | -1.0583290 |
| C | 5.2575440  | 0.2020990 | -2.2689880 | C | 2.5204200  | -3.8353950 | -0.5958330 |
| C | 2.4696260  | 1.3930720 | 0.0162200  | C | 3.3843330  | -3.0533460 | 0.2081940  |
| C | 1.5622950  | 0.3051650 | 0.2527030  | C | 3.0894680  | -1.7464630 | 0.5270070  |
| C | 0.2909770  | 0.5883710 | 0.7315310  | C | 0.4138510  | -4.0396090 | -1.8298940 |
| C | -0.1123250 | 1.9224650 | 1.0448350  | C | 0.7166520  | -5.3428720 | -2.1389840 |
| C | 0.8045660  | 2.9830360 | 0.8355810  | C | 1.9274760  | -5.9213610 | -1.6858530 |
| C | 2.0867470  | 2.6829860 | 0.3128190  | C | 2.8054210  | -5.1859290 | -0.9297150 |
| C | 0.3830830  | 4.3124010 | 1.1018720  | O | -0.1056500 | -1.3798080 | -1.2647510 |
| C | -0.8886540 | 4.5685510 | 1.5497030  | B | -1.1721420 | -0.8697010 | -0.3984240 |

|   |            |            |            |   |            |            |            |
|---|------------|------------|------------|---|------------|------------|------------|
| O | -0.6115150 | -0.3993680 | 0.8911390  | H | -6.2142570 | -4.0529420 | -0.2412880 |
| C | 4.0283460  | -1.0334110 | 1.4355370  | H | -8.6348780 | -3.8021000 | 0.3030960  |
| C | 3.5680690  | -0.2775130 | 2.5205880  | H | -9.4010640 | -1.8762530 | 1.6781400  |
| C | 4.4659900  | 0.3614910  | 3.3700150  | H | -7.7384670 | -0.2235470 | 2.5010680  |
| C | 5.8389280  | 0.2537050  | 3.1539770  | H | -5.3347930 | -0.4864030 | 1.9458030  |
| C | 6.3073820  | -0.5043130 | 2.0836410  | H | -4.8086750 | 4.0475380  | -1.2445000 |
| C | 5.4092370  | -1.1403780 | 1.2334590  | H | -3.8476340 | 6.2458530  | -1.9164940 |
| O | -2.1575980 | -1.8997760 | -0.0882440 | H | -1.4275420 | 6.4153030  | -2.4826410 |
| B | -3.4353110 | -1.5399940 | 0.0972110  | H | -0.0082830 | 4.3745860  | -2.3765350 |
| O | -3.9016850 | -0.2590060 | -0.1483370 | H | -0.9782210 | 2.1987930  | -1.7336780 |
| B | -3.0363650 | 0.6237820  | -0.7812420 | H | -1.2063400 | 5.5909870  | 1.7321600  |
| O | -3.5953750 | 1.8609490  | -1.0477250 | H | 1.0840290  | 5.1255720  | 0.9278190  |
| C | -2.9586000 | 2.9989220  | -1.4519480 | H | 2.7650890  | 3.5042910  | 0.0952400  |
| C | -1.6020450 | 3.0818090  | -1.7805990 | H | 4.7937990  | 2.4945390  | 0.8060620  |
| C | -1.0679820 | 4.3161550  | -2.1427780 | H | 7.0317800  | 2.2453520  | -0.2184490 |
| C | -1.8593950 | 5.4607410  | -2.1980150 | H | 7.3399940  | 0.7520790  | -2.1829320 |
| C | -3.2127130 | 5.3650030  | -1.8798570 | H | 5.3813120  | -0.4497310 | -3.1289290 |
| C | -3.7596170 | 4.1426670  | -1.5069220 | H | 3.1429340  | -0.1672310 | -2.1201560 |
| O | -4.3281400 | -2.5106830 | 0.5312450  | H | 5.7739020  | -1.6914720 | 0.3708720  |
| C | -5.6420840 | -2.2858340 | 0.8153460  | H | 7.3746290  | -0.5854730 | 1.8974070  |
| C | -6.5708450 | -3.2199390 | 0.3559180  | H | 6.5373730  | 0.7576040  | 3.8158290  |
| C | -7.9187090 | -3.0709190 | 0.6666890  | H | 4.0903770  | 0.9434640  | 4.2066280  |
| C | -8.3491430 | -1.9930100 | 1.4372710  | H | 2.4997380  | -0.1928090 | 2.6955390  |
| C | -7.4152210 | -1.0666950 | 1.8975670  | H | 4.2766480  | -3.5170070 | 0.6211220  |
| C | -6.0643480 | -1.2074880 | 1.5953930  | H | 3.7326340  | -5.6263840 | -0.5709150 |
| O | -1.7863900 | 0.2670320  | -1.1034930 | H | 2.1562090  | -6.9537490 | -1.9346620 |
| H | 0.0247670  | -5.9382440 | -2.7271560 | H | -0.5127840 | -3.5776010 | -2.1527500 |
| H | -2.0993470 | 1.3802300  | 1.6850210  | H | -2.8035050 | 3.7197330  | 2.1129390  |

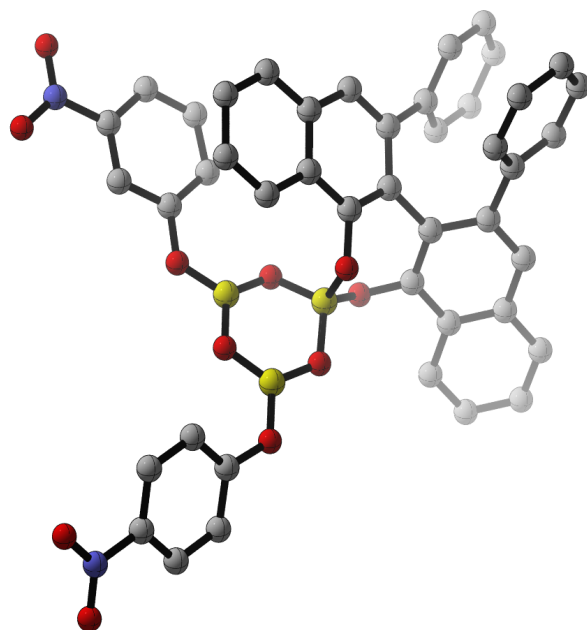

#### Entry 4

File Name: cat4

#### RRHO Thermochemistry (T = 298)

|                                                     |                             |
|-----------------------------------------------------|-----------------------------|
| Zero-point correction (RRHO)=                       | 0.657709 (Hartree/Particle) |
| Thermal correction to Energy (RRHO)=                | 0.703162                    |
| Thermal correction to Enthalpy (RRHO)=              | 0.704106                    |
| Thermal correction to Gibbs Free Energy (RRHO)=     | 0.575303                    |
| Sum of electronic and zero-point Energies (RRHO)=   | -2703.865917                |
| Sum of electronic and thermal Energies (RRHO)=      | -2703.820464                |
| Sum of electronic and thermal Enthalpies (RRHO)=    | -2703.819520                |
| Sum of electronic and thermal Free Energies (RRHO)= | -2703.948323                |

#### Quasi-RRHO Thermochemistry (T = 298, $\nu_0 = 100 \text{ cm}^{-1}$ )

|                                                      |                             |
|------------------------------------------------------|-----------------------------|
| Zero-point correction (QRRHO)=                       | 0.657709 (Hartree/Particle) |
| Thermal correction to Energy (QRRHO)=                | 0.703162                    |
| Thermal correction to Enthalpy (QRRHO)=              | 0.704106                    |
| Thermal correction to Gibbs Free Energy (QRRHO)=     | 0.586792                    |
| Sum of electronic and zero-point Energies (QRRHO)=   | -2703.865917                |
| Sum of electronic and thermal Energies (QRRHO)=      | -2703.820464                |
| Sum of electronic and thermal Enthalpies (QRRHO)=    | -2703.819520                |
| Sum of electronic and thermal Free Energies (QRRHO)= | -2703.936834                |

#### Quasi-harmonic Thermochemistry (T = 298, cutoff = $100 \text{ cm}^{-1}$ )

|                                       |                             |
|---------------------------------------|-----------------------------|
| Zero-point correction (QHO)=          | 0.657709 (Hartree/Particle) |
| Thermal correction to Energy (QHO)=   | 0.703377                    |
| Thermal correction to Enthalpy (QHO)= | 0.704106                    |

|                                                    |              |
|----------------------------------------------------|--------------|
| Thermal correction to Gibbs Free Energy (QHO)=     | 0.589272     |
| Sum of electronic and zero-point Energies (QHO)=   | -2703.865917 |
| Sum of electronic and thermal Energies (QHO)=      | -2703.820249 |
| Sum of electronic and thermal Enthalpies (QHO)=    | -2703.819520 |
| Sum of electronic and thermal Free Energies (QHO)= | -2703.934354 |

|   |            |            |            |   |            |            |            |
|---|------------|------------|------------|---|------------|------------|------------|
| C | 4.7525880  | 0.3110220  | -1.5033490 | C | -2.0941580 | 5.2223670  | -1.3058310 |
| C | 4.4993260  | 1.0320530  | -0.3298820 | C | -2.7452740 | 4.0109420  | -1.1318900 |
| C | 5.5639880  | 1.6940860  | 0.2920510  | O | -3.6335060 | -2.8172700 | -0.0349050 |
| C | 6.8494230  | 1.6310440  | -0.2352750 | C | -4.9384420 | -2.6264700 | 0.2483140  |
| C | 7.0933930  | 0.9009630  | -1.3959110 | C | -5.8332570 | -3.6032370 | -0.2078500 |
| C | 6.0392860  | 0.2436520  | -2.0286650 | C | -7.1822710 | -3.5086660 | 0.0874410  |
| C | 3.1298890  | 1.1308020  | 0.2428040  | C | -7.6254480 | -2.4295330 | 0.8459860  |
| C | 2.2531000  | -0.0036740 | 0.3336620  | C | -6.7536200 | -1.4524560 | 1.3152690  |
| C | 0.9552580  | 0.1935140  | 0.7802620  | C | -5.4037020 | -1.5519640 | 1.0189290  |
| C | 0.4954810  | 1.4734200  | 1.2143690  | O | -0.9505340 | 0.0518250  | -1.2128610 |
| C | 1.3819490  | 2.5775120  | 1.1518910  | H | 1.0722310  | -6.0210560 | -3.2261970 |
| C | 2.6913720  | 2.3721560  | 0.6505230  | H | -1.4907010 | 0.8024930  | 1.7234800  |
| C | 0.9007550  | 3.8592560  | 1.5285360  | H | -5.4429140 | -4.4282420 | -0.7930750 |
| C | -0.3975010 | 4.0289280  | 1.9411680  | H | -7.8906880 | -4.2513720 | -0.2579010 |
| C | -1.2734610 | 2.9186370  | 2.0180980  | H | -7.1375460 | -0.6311060 | 1.9075750  |
| C | -0.8341800 | 1.6658400  | 1.6670790  | H | -4.7070380 | -0.8016900 | 1.3698540  |
| C | 2.6507670  | -1.3983970 | -0.0146000 | H | -3.7984030 | 3.9722570  | -0.8844530 |
| C | 1.8334150  | -2.1254490 | -0.8733940 | H | -0.2779240 | 6.2889000  | -1.7333570 |
| C | 2.1865980  | -3.4494000 | -1.2872300 | H | 1.0263080  | 4.1629390  | -1.9744090 |
| C | 3.3915320  | -4.0251330 | -0.8126290 | H | -0.0789740 | 1.9773580  | -1.6795700 |
| C | 4.1910240  | -3.2861490 | 0.0924470  | H | -0.7588110 | 5.0174710  | 2.2091660  |
| C | 3.8389650  | -2.0196010 | 0.5015720  | H | 1.5758870  | 4.7094330  | 1.4641060  |
| C | 1.3540420  | -4.1908650 | -2.1625680 | H | 3.3482060  | 3.2318530  | 0.5419330  |
| C | 1.7153030  | -5.4550590 | -2.5589150 | H | 5.3837430  | 2.2221150  | 1.2244720  |
| C | 2.9221070  | -6.0321170 | -2.0937230 | H | 7.6652110  | 2.1368600  | 0.2733620  |
| C | 3.7376850  | -5.3348030 | -1.2383190 | H | 8.0975640  | 0.8435990  | -1.8057420 |
| O | 0.7209400  | -1.6018320 | -1.4165410 | H | 6.2173830  | -0.3208200 | -2.9392480 |
| B | -0.3906890 | -1.1612320 | -0.5803800 | H | 3.9343110  | -0.1982810 | -2.0035120 |
| O | 0.0721360  | -0.8266270 | 0.7834590  | H | 6.5240800  | -1.8652560 | 0.4713800  |
| C | 4.7126470  | -1.3557450 | 1.5076740  | H | 8.0184350  | -0.8411580 | 2.1547890  |
| C | 4.1804820  | -0.7090480 | 2.6297840  | H | 7.0537850  | 0.3088280  | 4.1376920  |
| C | 5.0182820  | -0.1142570 | 3.5682550  | H | 4.5871910  | 0.3827320  | 4.4324120  |
| C | 6.4021970  | -0.1598780 | 3.4060070  | H | 3.1033390  | -0.6742760 | 2.7631460  |
| C | 6.9421510  | -0.8101170 | 2.2990120  | H | 5.0793250  | -3.7551150 | 0.5078710  |
| C | 6.1038310  | -1.4006780 | 1.3592980  | H | 4.6615420  | -5.7745060 | -0.8703710 |
| O | -1.4174460 | -2.1953730 | -0.4451250 | H | 3.1973150  | -7.0331760 | -2.4130310 |
| B | -2.6913420 | -1.8218620 | -0.3014260 | H | 0.4286530  | -3.7338760 | -2.4955130 |
| O | -3.1257590 | -0.5146650 | -0.4336460 | H | -2.2979530 | 3.0645410  | 2.3474800  |
| B | -2.2039700 | 0.4052960  | -0.9161910 | N | -2.8717210 | 6.4570050  | -1.1488760 |
| O | -2.7158310 | 1.6865350  | -1.0682690 | N | -9.0451110 | -2.3235890 | 1.1633110  |
| C | -2.0129370 | 2.8313290  | -1.2697710 | O | -9.7924540 | -3.1946160 | 0.7462620  |
| C | -0.6495140 | 2.8922790  | -1.5850590 | O | -2.2896070 | 7.5199120  | -1.2906020 |
| C | -0.0346490 | 4.1317950  | -1.7474290 | O | -9.4150990 | -1.3708100 | 1.8305860  |
| C | -0.7428080 | 5.3193850  | -1.6117370 | O | -4.0577650 | 6.3596580  | -0.8835890 |

**Figure SI-1** Catalyst-imine structures used to determine the H-bond distances seen in Table 4.

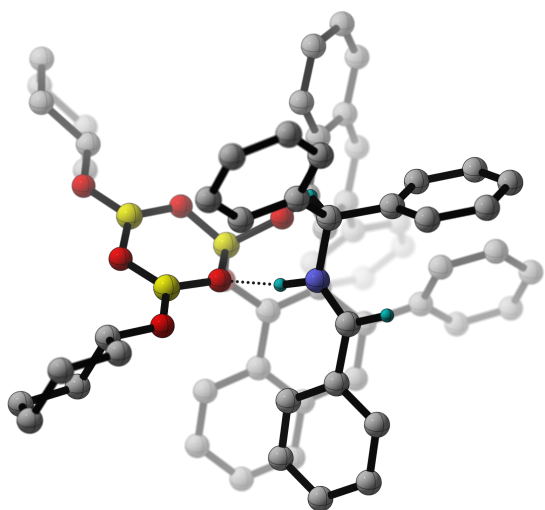

Boroxinate-H-Imine Complex **4a**

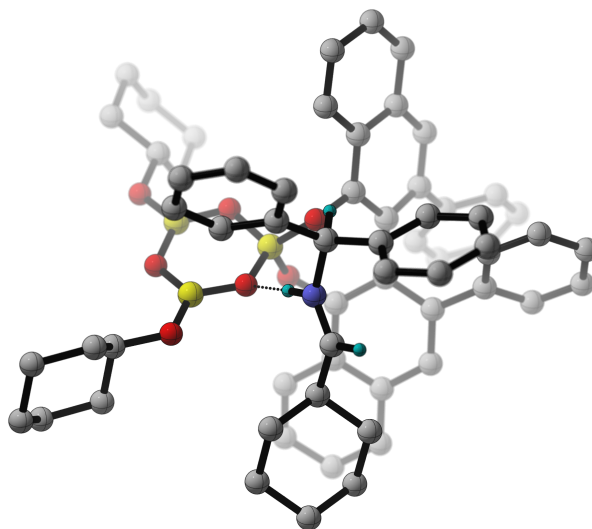

Boroxinate-H-Imine Complex **4e**

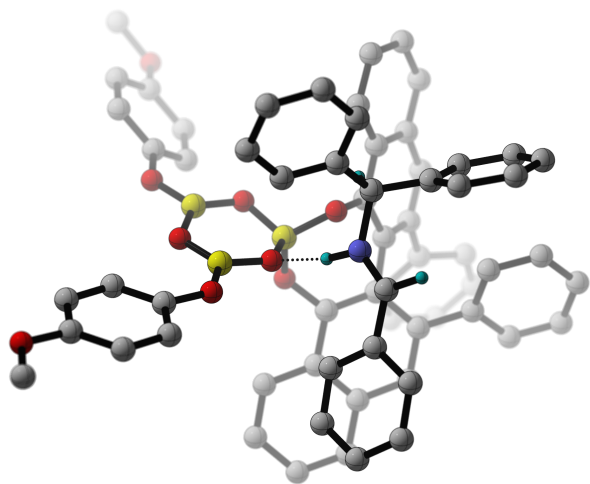

Boroxinate-H-Imine Complex **4b**

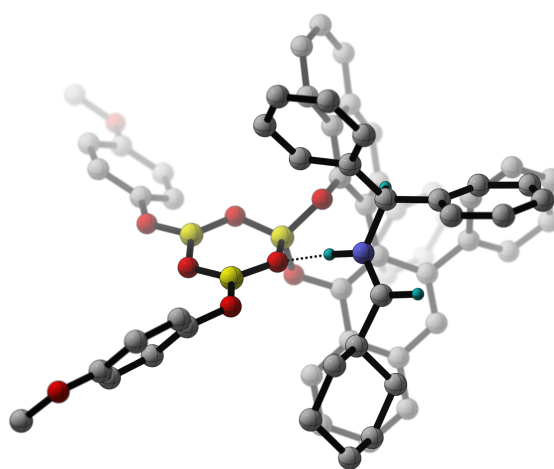

Boroxinate-H-Imine Complex **4f**

Figure SI-1 (Cont'd)

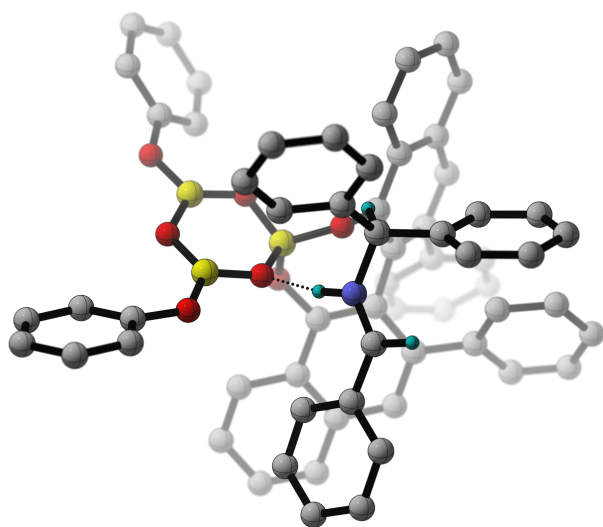

Boroxinate-H-Imine Complex **4c**

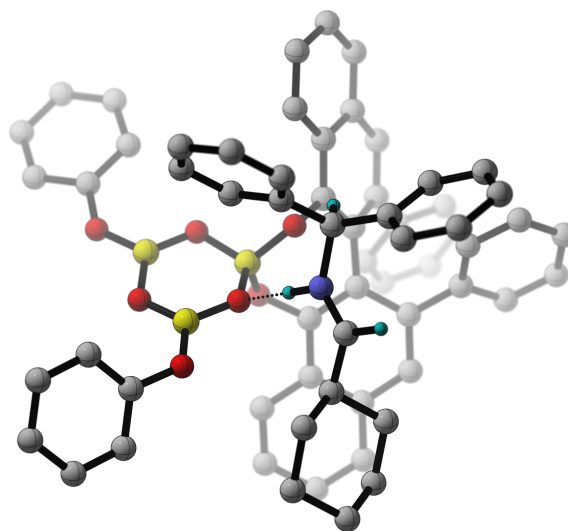

Boroxinate-H-Imine Complex **4g**

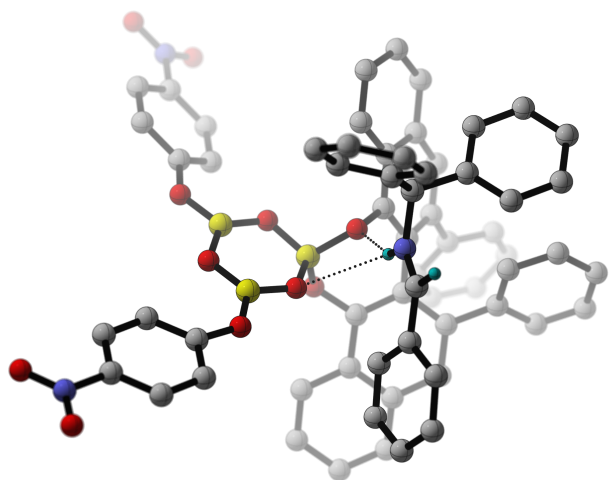

Boroxinate-H-Imine Complex **4d**

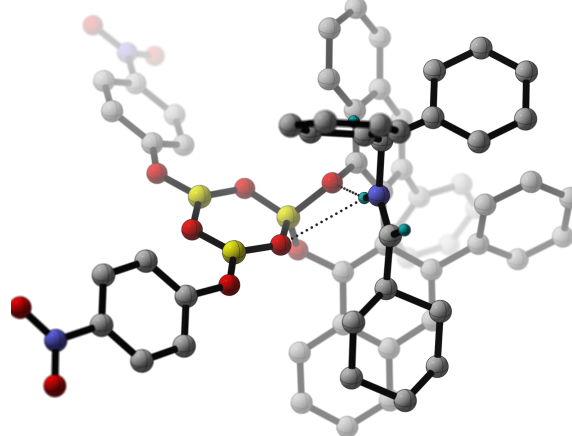

Boroxinate-H-Imine Complex **4h**

### ***Coordinates Used for Hydrogen Bonding Interactions in the Catalyst-Iminium Complex:***

Optimizations of catalyst-borox-iminium complexes were carried out at the M06-2X/6-31G\* level of theory as implemented by the Gaussian 16 software package with bulk solvent effects accounted for with the self-consistent reaction field polarizable continuum model (PCM) as implemented for toluene.

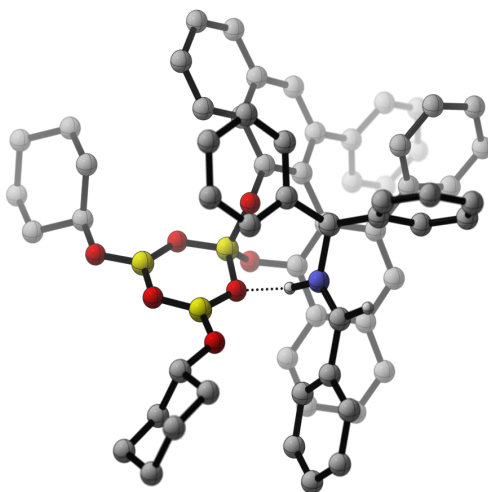

Boroxinate-H-Iminium Complex **4a**

File Name: catim4a

RRHO Thermochemistry (T = 298)

|                                                     |                             |
|-----------------------------------------------------|-----------------------------|
| Zero-point correction (RRHO)=                       | 1.126118 (Hartree/Particle) |
| Thermal correction to Energy (RRHO)=                | 1.187473                    |
| Thermal correction to Enthalpy (RRHO)=              | 1.188417                    |
| Thermal correction to Gibbs Free Energy (RRHO)=     | 1.026235                    |
| Sum of electronic and zero-point Energies (RRHO)=   | -3129.018780                |
| Sum of electronic and thermal Energies (RRHO)=      | -3128.957425                |
| Sum of electronic and thermal Enthalpies (RRHO)=    | -3128.956481                |
| Sum of electronic and thermal Free Energies (RRHO)= | -3129.118663                |

Quasi-RRHO Thermochemistry (T = 298,  $\nu_0 = 100 \text{ cm}^{-1}$ )

|                                                      |                             |
|------------------------------------------------------|-----------------------------|
| Zero-point correction (QRRHO)=                       | 1.126118 (Hartree/Particle) |
| Thermal correction to Energy (QRRHO)=                | 1.187473                    |
| Thermal correction to Enthalpy (QRRHO)=              | 1.188417                    |
| Thermal correction to Gibbs Free Energy (QRRHO)=     | 1.042350                    |
| Sum of electronic and zero-point Energies (QRRHO)=   | -3129.018780                |
| Sum of electronic and thermal Energies (QRRHO)=      | -3128.957425                |
| Sum of electronic and thermal Enthalpies (QRRHO)=    | -3128.956481                |
| Sum of electronic and thermal Free Energies (QRRHO)= | -3129.102548                |

Quasi-harmonic Thermochemistry (T = 298, cutoff = 100 cm-1)

Zero-point correction (QHO)= 1.126118 (Hartree/Particle)  
 Thermal correction to Energy (QHO)= 1.187795  
 Thermal correction to Enthalpy (QHO)= 1.188417  
 Thermal correction to Gibbs Free Energy (QHO)= 1.045486  
 Sum of electronic and zero-point Energies (QHO)= -3129.018780  
 Sum of electronic and thermal Energies (QHO)= -3128.957103  
 Sum of electronic and thermal Enthalpies (QHO)= -3128.956481  
 Sum of electronic and thermal Free Energies (QHO)= -3129.099412

|   |            |            |            |   |            |            |            |
|---|------------|------------|------------|---|------------|------------|------------|
| C | 4.0197040  | -1.1760430 | 1.0080360  | B | -2.9171400 | 0.3451040  | -0.3057560 |
| C | 3.9513690  | -1.6441280 | -0.3108010 | O | -3.4554530 | 1.6062740  | -0.3073170 |
| C | 5.0487520  | -2.3444640 | -0.8256590 | B | -2.6289780 | 2.6725890  | -0.6705980 |
| C | 6.1809570  | -2.5703500 | -0.0496200 | O | -3.2337330 | 3.8943360  | -0.7231350 |
| C | 6.2356680  | -2.1015340 | 1.2604060  | O | -3.6459560 | -0.7537730 | 0.0664490  |
| C | 5.1491640  | -1.4052030 | 1.7866280  | O | -1.3236740 | 2.4914180  | -0.9633130 |
| C | 2.7406680  | -1.4573590 | -1.1594990 | N | -0.7293460 | -2.0423670 | 0.7753840  |
| C | 2.0246670  | -0.2135690 | -1.2260590 | C | -1.2798160 | -3.2042220 | 0.7687090  |
| C | 0.8783850  | -0.1406100 | -2.0084090 | C | -2.2555000 | -3.6838230 | -0.1891120 |
| C | 0.4408190  | -1.2464700 | -2.7994460 | C | -2.9315050 | -4.8708500 | 0.1317590  |
| C | 1.1517490  | -2.4704580 | -2.7207520 | C | -3.9061660 | -5.3675140 | -0.7226820 |
| C | 2.2888990  | -2.5458930 | -1.8780940 | C | -4.1860660 | -4.6929080 | -1.9113920 |
| C | 0.6911760  | -3.5752260 | -3.4864850 | C | -3.4921100 | -3.5291100 | -2.2478750 |
| C | -0.3953120 | -3.4488050 | -4.3154080 | C | -2.5318440 | -3.0147370 | -1.3890310 |
| C | -1.0787320 | -2.2113750 | -4.4175980 | C | 0.2553600  | -1.5801600 | 1.7831580  |
| C | -0.6776360 | -1.1346880 | -3.6655690 | C | 0.8835280  | -2.7483000 | 2.5234760  |
| H | -1.9240050 | -2.1198870 | -5.0936510 | C | 0.5133360  | -3.0812390 | 3.8274170  |
| C | 2.4274360  | 1.0134710  | -0.4821410 | C | 1.0995450  | -4.1742070 | 4.4642650  |
| C | 1.4565960  | 1.6297470  | 0.2961480  | C | 2.0573110  | -4.9385480 | 3.8036840  |
| C | 1.7665910  | 2.7562110  | 1.1174410  | C | 2.4246060  | -4.6148650 | 2.4979960  |
| C | 3.0886100  | 3.2685900  | 1.1089890  | C | 1.8359670  | -3.5287320 | 1.8602500  |
| C | 4.0529670  | 2.6620780  | 0.2656840  | C | -0.3700050 | -0.5341060 | 2.6893960  |
| C | 3.7488290  | 1.5738330  | -0.5212980 | C | 0.4895200  | 0.2537510  | 3.4587610  |
| C | 0.7811850  | 3.3622680  | 1.9351140  | C | -0.0221910 | 1.2160740  | 4.3196110  |
| C | 1.1007670  | 4.4466310  | 2.7154370  | C | -1.4010230 | 1.4108980  | 4.4109740  |
| C | 2.4184300  | 4.9665520  | 2.7089520  | C | -2.2584150 | 0.6315840  | 3.6420390  |
| C | 3.3879510  | 4.3914940  | 1.9253100  | C | -1.7462670 | -0.3474690 | 2.7886500  |
| H | -0.2191370 | 2.9406700  | 1.9290500  | H | 2.6592670  | 5.8261080  | 3.3274850  |
| O | 0.2029370  | 1.1413460  | 0.3539170  | H | 4.3995970  | 4.7892150  | 1.9148550  |
| B | -0.6560550 | 1.2171590  | -0.8472580 | H | 5.0469600  | 3.0986120  | 0.2117610  |
| O | 0.1439580  | 0.9884680  | -2.0531510 | H | 6.3134150  | 1.0779820  | 0.1255360  |
| C | 4.8105900  | 1.0295730  | -1.4101210 | H | 8.1152910  | 0.2061430  | -1.3260660 |
| C | 6.1096620  | 0.8558730  | -0.9183730 | H | 7.6282700  | -0.3914040 | -3.6895770 |
| C | 7.1181950  | 0.3506960  | -1.7318530 | H | 5.3367420  | -0.0622350 | -4.5915040 |
| C | 6.8441480  | 0.0095640  | -3.0542300 | H | 3.5499050  | 0.8434730  | -3.1449370 |
| C | 5.5569350  | 0.1887170  | -3.5581110 | H | 5.0256660  | -2.6735680 | -1.8606510 |
| C | 4.5487800  | 0.6972930  | -2.7447570 | H | 7.0283660  | -3.0987690 | -0.4763270 |
| O | -1.6265130 | 0.1048860  | -0.6664680 | H | 7.1196510  | -2.2732480 | 1.8670760  |



|   |            |            |            |   |            |            |            |
|---|------------|------------|------------|---|------------|------------|------------|
| H | 5.1788550  | -1.0388220 | 2.8083650  | H | -4.1313390 | 6.3207000  | -0.7128950 |
| H | 3.1854090  | -0.6200630 | 1.4269190  | H | -3.9921570 | 5.7788700  | -2.3879580 |
| H | 2.8137190  | -3.4948890 | -1.7957170 | C | -0.8620420 | 6.7876730  | -0.2069300 |
| H | 1.2251920  | -4.5193650 | -3.4143510 | H | -2.3037220 | 5.6729180  | 0.9674500  |
| H | -0.7317500 | -4.2975620 | -4.9032740 | H | -0.9302540 | 4.7039070  | 0.4015060  |
| H | 1.0224270  | -1.0807770 | 1.1777230  | C | -1.8173680 | 7.8913280  | -0.6683000 |
| H | -1.0266630 | -1.2931590 | 0.0986020  | H | -3.3611140 | 8.2025360  | -2.1664350 |
| H | -0.9806000 | -3.8839310 | 1.5653430  | H | -1.9939680 | 7.2380650  | -2.7156790 |
| H | -2.6967000 | -5.3910610 | 1.0564880  | H | -0.2845310 | 7.1121350  | 0.6656190  |
| H | -4.4391990 | -6.2777320 | -0.4703130 | H | -0.1356370 | 6.5813640  | -1.0048100 |
| H | -4.9415410 | -5.0834720 | -2.5862850 | H | -1.2591530 | 8.7967760  | -0.9311520 |
| H | -3.6977890 | -3.0194100 | -3.1835080 | H | -2.4878900 | 8.1576190  | 0.1608300  |
| H | -1.9976920 | -2.1062250 | -1.6511020 | C | -5.0425150 | -0.6849170 | 0.3276010  |
| H | -0.2228110 | -2.4773620 | 4.3495400  | C | -5.8221520 | -0.5353620 | -0.9760880 |
| H | 2.1152810  | -3.2759470 | 0.8402330  | C | -5.4285390 | -1.9715130 | 1.0476040  |
| H | -2.4296970 | -0.9395910 | 2.1868530  | H | -5.2498430 | 0.1816930  | 0.9729410  |
| H | 1.5655190  | 0.1162790  | 3.3741180  | C | -7.3313260 | -0.5934040 | -0.7263170 |
| H | 0.3414460  | 4.9102880  | 3.3388500  | H | -5.5205690 | -1.3597130 | -1.6379060 |
| H | -1.1909790 | -0.1805830 | -3.7166450 | H | -5.5396600 | 0.4045060  | -1.4618310 |
| H | 0.6563010  | 1.8321460  | 4.9012300  | C | -6.9358900 | -2.0334450 | 1.3041270  |
| H | -1.8010780 | 2.1723200  | 5.0731500  | H | -5.1211230 | -2.8141650 | 0.4107280  |
| H | -3.3325330 | 0.7804540  | 3.6997900  | H | -4.8637680 | -2.0502780 | 1.9848130  |
| H | 3.1757510  | -5.2012860 | 1.9783910  | C | -7.7182370 | -1.8861810 | -0.0036110 |
| H | 2.5196100  | -5.7829700 | 4.3053150  | H | -7.8714550 | -0.5056320 | -1.6747480 |
| H | 0.8103780  | -4.4220040 | 5.4806780  | H | -7.6302000 | 0.2669850  | -0.1120670 |
| C | -2.4591680 | 5.0399950  | -1.0694120 | H | -7.1935570 | -2.9734100 | 1.8035270  |
| C | -3.4165690 | 6.1334550  | -1.5259040 | H | -7.2226220 | -1.2224390 | 1.9878090  |
| C | -1.6239280 | 5.5015720  | 0.1203710  | H | -8.7956900 | -1.9070620 | 0.1924240  |
| H | -1.7801470 | 4.7793340  | -1.8935630 | H | -7.4929290 | -2.7432520 | -0.6541210 |
| C | -2.6577960 | 7.4210120  | -1.8592930 |   |            |            |            |

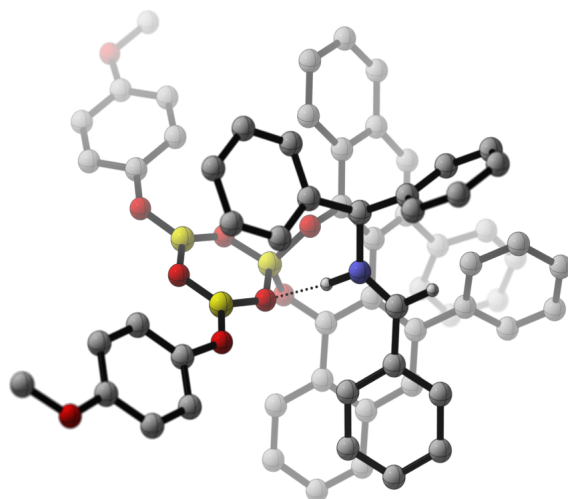

Boronxinate-H-Iminium Complex **4b**

File Name: catim4b

RRHO Thermochemistry (T = 298)

|                                                     |                             |
|-----------------------------------------------------|-----------------------------|
| Zero-point correction (RRHO)=                       | 1.050135 (Hartree/Particle) |
| Thermal correction to Energy (RRHO)=                | 1.114383                    |
| Thermal correction to Enthalpy (RRHO)=              | 1.115327                    |
| Thermal correction to Gibbs Free Energy (RRHO)=     | 0.943116                    |
| Sum of electronic and zero-point Energies (RRHO)=   | -3350.819070                |
| Sum of electronic and thermal Energies (RRHO)=      | -3350.754822                |
| Sum of electronic and thermal Enthalpies (RRHO)=    | -3350.753878                |
| Sum of electronic and thermal Free Energies (RRHO)= | -3350.926089                |

Quasi-RRHO Thermochemistry (T = 298,  $\nu_0 = 100 \text{ cm}^{-1}$ )

|                                                      |                             |
|------------------------------------------------------|-----------------------------|
| Zero-point correction (QRRHO)=                       | 1.050135 (Hartree/Particle) |
| Thermal correction to Energy (QRRHO)=                | 1.114383                    |
| Thermal correction to Enthalpy (QRRHO)=              | 1.115327                    |
| Thermal correction to Gibbs Free Energy (QRRHO)=     | 0.962060                    |
| Sum of electronic and zero-point Energies (QRRHO)=   | -3350.819070                |
| Sum of electronic and thermal Energies (QRRHO)=      | -3350.754822                |
| Sum of electronic and thermal Enthalpies (QRRHO)=    | -3350.753878                |
| Sum of electronic and thermal Free Energies (QRRHO)= | -3350.907145                |

Quasi-harmonic Thermochemistry (T = 298, cutoff =  $100 \text{ cm}^{-1}$ )

|                                                  |                             |
|--------------------------------------------------|-----------------------------|
| Zero-point correction (QHO)=                     | 1.050135 (Hartree/Particle) |
| Thermal correction to Energy (QHO)=              | 1.114733                    |
| Thermal correction to Enthalpy (QHO)=            | 1.115327                    |
| Thermal correction to Gibbs Free Energy (QHO)=   | 0.967060                    |
| Sum of electronic and zero-point Energies (QHO)= | -3350.819070                |

|                                                    |              |
|----------------------------------------------------|--------------|
| Sum of electronic and thermal Energies (QHO)=      | -3350.754472 |
| Sum of electronic and thermal Enthalpies (QHO)=    | -3350.753878 |
| Sum of electronic and thermal Free Energies (QHO)= | -3350.902145 |

|   |            |            |            |   |            |            |            |
|---|------------|------------|------------|---|------------|------------|------------|
| C | 3.9660350  | -0.8420480 | 1.1401780  | C | -2.6808420 | 4.4157770  | -0.6401980 |
| C | 4.2695540  | -1.1470320 | -0.1937790 | O | -3.0660230 | -2.1524830 | -0.5262230 |
| C | 5.5690740  | -1.5729200 | -0.4960670 | C | -4.3384260 | -2.6614460 | -0.4727080 |
| C | 6.5304010  | -1.7004070 | 0.5001670  | C | -5.4831910 | -1.9082330 | -0.2297940 |
| C | 6.2118560  | -1.4074510 | 1.8247030  | C | -6.7299630 | -2.5358470 | -0.1602320 |
| C | 4.9254410  | -0.9755040 | 2.1403100  | C | -6.8357780 | -3.9149180 | -0.3302340 |
| C | 3.2327580  | -1.0898320 | -1.2577650 | C | -5.6808290 | -4.6677370 | -0.5690180 |
| C | 2.2223310  | -0.0664570 | -1.2923510 | C | -4.4464840 | -4.0455410 | -0.6381450 |
| C | 1.1469640  | -0.2246820 | -2.1589730 | O | -1.7383870 | 1.7055380  | -1.1917860 |
| C | 1.1066110  | -1.2976690 | -3.1040770 | N | 0.3379440  | -1.4719290 | 1.4873150  |
| C | 2.1933370  | -2.2046890 | -3.1622890 | C | 1.1367950  | -2.4794970 | 1.4463350  |
| C | 3.2167930  | -2.1026860 | -2.1892420 | C | 1.2397460  | -3.4157480 | 0.3464560  |
| C | 2.1766400  | -3.2325310 | -4.1407630 | C | 2.3284430  | -4.2995180 | 0.3593880  |
| C | 1.1143220  | -3.3637990 | -4.9999070 | C | 2.4577250  | -5.2494320 | -0.6446890 |
| C | 0.0141900  | -2.4747600 | -4.9157700 | C | 1.4917960  | -5.3274870 | -1.6472970 |
| C | 0.0115170  | -1.4600940 | -3.9894890 | C | 0.4030690  | -4.4537600 | -1.6578750 |
| H | -0.8248520 | -2.5939790 | -5.5943370 | C | 0.2720720  | -3.4907380 | -0.6696200 |
| C | 2.3249680  | 1.2026920  | -0.5159510 | C | 0.1436410  | -0.5516910 | 2.6329560  |
| C | 1.2111690  | 1.6601880  | 0.1712130  | C | 0.8617280  | -1.0205710 | 3.8789870  |
| C | 1.2487920  | 2.8473420  | 0.9638790  | C | 0.3755340  | -2.0884730 | 4.6392510  |
| C | 2.4583970  | 3.5794530  | 1.0496530  | C | 1.0635380  | -2.5087580 | 5.7722730  |
| C | 3.5782450  | 3.1265280  | 0.3101910  | C | 2.2348020  | -1.8578820 | 6.1614010  |
| C | 3.5292030  | 1.9903060  | -0.4671390 | C | 2.7166150  | -0.7869620 | 5.4145170  |
| C | 0.1007640  | 3.2996380  | 1.6626340  | C | 2.0328220  | -0.3721350 | 4.2724280  |
| C | 0.1583440  | 4.4410810  | 2.4253900  | C | -1.3462240 | -0.3311560 | 2.8235900  |
| C | 1.3672210  | 5.1737060  | 2.5202880  | C | -1.7664530 | 0.8575070  | 3.4247150  |
| C | 2.4878770  | 4.7540570  | 1.8470260  | C | -3.1210480 | 1.1075560  | 3.6125280  |
| H | -0.8155850 | 2.7246910  | 1.5687760  | C | -4.0689920 | 0.1687760  | 3.2050080  |
| O | 0.0658890  | 0.9514250  | 0.2104940  | C | -3.6544340 | -1.0238290 | 2.6209890  |
| B | -0.7268440 | 0.6873690  | -1.0049700 | C | -2.2950020 | -1.2759990 | 2.4336540  |
| O | 0.1287640  | 0.6584260  | -2.1854220 | H | -5.4104490 | -0.8361850 | -0.0997910 |
| C | 4.7447110  | 1.6495600  | -1.2568900 | H | -7.6069010 | -1.9271100 | 0.0260780  |
| C | 6.0045050  | 1.7048290  | -0.6493560 | H | -5.7772970 | -5.7407070 | -0.6980880 |
| C | 7.1585690  | 1.4186090  | -1.3710610 | H | -3.5426390 | -4.6179620 | -0.8221580 |
| C | 7.0708280  | 1.0689480  | -2.7163850 | H | -5.5942120 | 4.0571070  | -2.3240820 |
| C | 5.8219340  | 1.0166280  | -3.3339010 | H | -5.3353330 | 6.5431600  | -2.4802380 |
| C | 4.6683680  | 1.3072230  | -2.6121530 | H | -1.6650980 | 6.2591990  | -0.2685690 |
| O | -1.3221330 | -0.6484320 | -0.7412220 | H | -1.9237320 | 3.8282070  | -0.1365790 |
| B | -2.6628920 | -0.8475430 | -0.7237910 | H | 1.4026170  | 6.0743700  | 3.1256720  |
| O | -3.5555920 | 0.1784780  | -0.9012140 | H | 3.4149610  | 5.3180070  | 1.9105790  |
| B | -3.0523950 | 1.4645400  | -1.0807050 | H | 4.4857700  | 3.7243690  | 0.3208710  |
| O | -4.0185610 | 2.4414720  | -1.1329310 | H | 6.0694230  | 1.9354770  | 0.4107230  |
| C | -3.7785230 | 3.7905160  | -1.2208600 | H | 8.1253180  | 1.4532520  | -0.8773920 |
| C | -4.7393560 | 4.5585820  | -1.8820840 | H | 7.9690730  | 0.8398020  | -3.2819230 |
| C | -4.5982700 | 5.9340810  | -1.9672580 | H | 5.7443750  | 0.7542840  | -4.3847380 |
| C | -3.4922550 | 6.5662660  | -1.3899360 | H | 3.6986920  | 1.2689090  | -3.1002720 |
| C | -2.5348840 | 5.8012110  | -0.7255970 | H | 5.8354880  | -1.7583450 | -1.5327770 |

|   |            |            |            |   |             |            |            |
|---|------------|------------|------------|---|-------------|------------|------------|
| H | 7.5362750  | -2.0153920 | 0.2386940  | H | -0.7254250  | 4.7885940  | 2.9525500  |
| H | 6.9618640  | -1.5060830 | 2.6034450  | H | -0.8126410  | -0.7585780 | -3.9210030 |
| H | 4.6647170  | -0.7443850 | 3.1692950  | H | -3.4383550  | 2.0397250  | 4.0691460  |
| H | 2.9721230  | -0.4785720 | 1.3899940  | H | -5.1268600  | 0.3691220  | 3.3413500  |
| H | 3.9711070  | -2.8839820 | -2.1481890 | H | -4.3840050  | -1.7617780 | 2.3019390  |
| H | 3.0157520  | -3.9229520 | -4.1850280 | H | 3.6204160   | -0.2692250 | 5.7206940  |
| H | 1.1102380  | -4.1534980 | -5.7454920 | H | 2.7652070   | -2.1822400 | 7.0510080  |
| H | 0.5808390  | 0.3992240  | 2.3157470  | H | 0.6810490   | -3.3375960 | 6.3592210  |
| H | -0.2192810 | -1.2113880 | 0.6487950  | O | -3.4407610  | 7.9228000  | -1.5273800 |
| H | 1.7617610  | -2.6446780 | 2.3226350  | O | -8.0037590  | -4.6149540 | -0.2800150 |
| H | 3.0732860  | -4.2239490 | 1.1475150  | C | -2.3226800  | 8.5818080  | -0.9742730 |
| H | 3.3036430  | -5.9284780 | -0.6443890 | H | -2.4532910  | 9.6412320  | -1.1948900 |
| H | 1.5894340  | -6.0704990 | -2.4331370 | H | -2.2725550  | 8.4401620  | 0.1122810  |
| H | -0.3306230 | -4.5047190 | -2.4559500 | H | -1.3877130  | 8.2278670  | -1.4248830 |
| H | -0.5772810 | -2.8133600 | -0.6878700 | C | -9.1869240  | -3.8795990 | -0.0519800 |
| H | -0.5491320 | -2.5802110 | 4.3462750  | H | -10.0008480 | -4.6042620 | -0.0540410 |
| H | 2.4022350  | 0.4687480  | 3.6878740  | H | -9.1577210  | -3.3678300 | 0.9175350  |
| H | -1.9903550 | -2.2060280 | 1.9601470  | H | -9.3551700  | -3.1400700 | -0.8439050 |
| H | -1.0256570 | 1.5919630  | 3.7325910  |   |             |            |            |

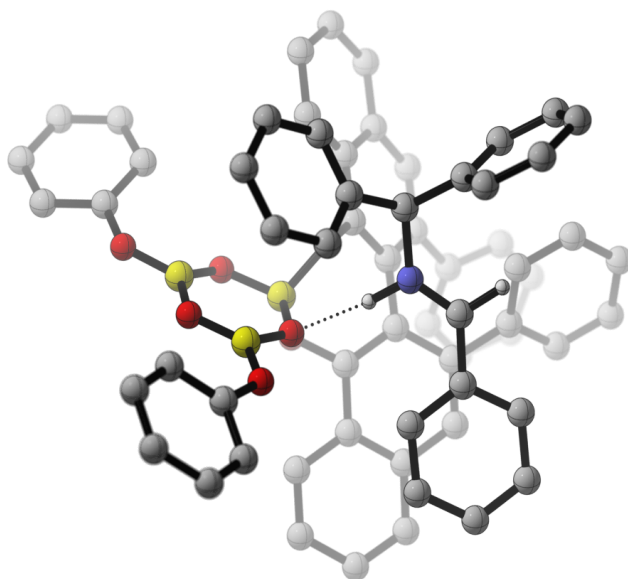

Boroxinate-H-Iminium Complex **4c**

File Name: catim4c

RRHO Thermochemistry (T = 298)

|                                                   |                             |
|---------------------------------------------------|-----------------------------|
| Zero-point correction (RRHO)=                     | 0.983779 (Hartree/Particle) |
| Thermal correction to Energy (RRHO)=              | 1.042875                    |
| Thermal correction to Enthalpy (RRHO)=            | 1.043819                    |
| Thermal correction to Gibbs Free Energy (RRHO)=   | 0.883672                    |
| Sum of electronic and zero-point Energies (RRHO)= | -3121.931149                |

Sum of electronic and thermal Energies (RRHO)= -3121.872053  
 Sum of electronic and thermal Enthalpies (RRHO)= -3121.871109  
 Sum of electronic and thermal Free Energies (RRHO)= -3122.031256

Quasi-RRHO Thermochemistry (T = 298, v0 = 100 cm-1)

Zero-point correction (QRRHO)= 0.983779 (Hartree/Particle)  
 Thermal correction to Energy (QRRHO)= 1.042875  
 Thermal correction to Enthalpy (QRRHO)= 1.043819  
 Thermal correction to Gibbs Free Energy (QRRHO)= 0.900819  
 Sum of electronic and zero-point Energies (QRRHO)= -3121.931149  
 Sum of electronic and thermal Energies (QRRHO)= -3121.872053  
 Sum of electronic and thermal Enthalpies (QRRHO)= -3121.871109  
 Sum of electronic and thermal Free Energies (QRRHO)= -3122.014109

Quasi-harmonic Thermochemistry (T = 298, cutoff = 100 cm-1)

Zero-point correction (QHO)= 0.983779 (Hartree/Particle)  
 Thermal correction to Energy (QHO)= 1.043201  
 Thermal correction to Enthalpy (QHO)= 1.043819  
 Thermal correction to Gibbs Free Energy (QHO)= 0.905115  
 Sum of electronic and zero-point Energies (QHO)= -3121.931149  
 Sum of electronic and thermal Energies (QHO)= -3121.871727  
 Sum of electronic and thermal Enthalpies (QHO)= -3121.871109  
 Sum of electronic and thermal Free Energies (QHO)= -3122.009813

|   |            |            |            |   |            |            |            |
|---|------------|------------|------------|---|------------|------------|------------|
| C | 3.6317590  | -0.1983350 | 1.2227850  | C | -0.6106570 | 3.5726990  | 1.1436300  |
| C | 3.9945210  | -0.6576970 | -0.0508000 | C | -0.6760140 | 4.8072140  | 1.7431610  |
| C | 5.3345370  | -0.9979280 | -0.2742720 | C | 0.4555970  | 5.6594780  | 1.7437390  |
| C | 6.2784920  | -0.8932470 | 0.7410640  | C | 1.6234580  | 5.2628830  | 1.1405150  |
| C | 5.9020230  | -0.4485920 | 2.0068720  | H | -1.4676360 | 2.9061830  | 1.1224230  |
| C | 4.5740530  | -0.0995520 | 2.2429280  | O | -0.3915030 | 1.0542080  | 0.0275130  |
| C | 2.9824820  | -0.8479800 | -1.1231740 | B | -1.1315900 | 0.5538390  | -1.1439180 |
| C | 1.8797020  | 0.0574280  | -1.3069690 | O | -0.2564400 | 0.4425190  | -2.3048800 |
| C | 0.8427430  | -0.3226000 | -2.1512510 | C | 4.2248720  | 1.9979500  | -1.4950780 |
| C | 0.9277550  | -1.5109900 | -2.9430710 | C | 5.4623210  | 2.2567250  | -0.8943050 |
| C | 2.0982790  | -2.3054290 | -2.8680370 | C | 6.6514190  | 1.9854290  | -1.5630920 |
| C | 3.0844790  | -1.9741280 | -1.9074060 | C | 6.6219370  | 1.4468590  | -2.8472900 |
| C | 2.2029950  | -3.4519170 | -3.6978680 | C | 5.3952790  | 1.1905220  | -3.4582730 |
| C | 1.1787750  | -3.8007740 | -4.5424690 | C | 4.2064140  | 1.4661340  | -2.7899820 |
| C | -0.0032070 | -3.0209620 | -4.5908930 | O | -1.6094260 | -0.7827570 | -0.7010940 |
| C | -0.1253400 | -1.8972910 | -3.8098350 | B | -2.9246390 | -1.1061450 | -0.6880280 |
| H | -0.8105640 | -3.3113200 | -5.2560960 | O | -3.9023480 | -0.2074170 | -1.0294810 |
| C | 1.8452120  | 1.4252620  | -0.7139060 | B | -3.5156680 | 1.0851530  | -1.3722770 |
| C | 0.6802360  | 1.8612050  | -0.1024680 | O | -4.5688500 | 1.9440550  | -1.5911930 |
| C | 0.5883110  | 3.1427580  | 0.5200500  | C | -4.4679390 | 3.2841870  | -1.8571140 |
| C | 1.7208480  | 3.9937330  | 0.5111720  | C | -5.4887910 | 3.8437090  | -2.6251640 |
| C | 2.8927920  | 3.5558550  | -0.1531140 | C | -5.4874790 | 5.2085810  | -2.8926220 |
| C | 2.9675840  | 2.3251890  | -0.7674240 | C | -4.4719710 | 6.0226450  | -2.3946310 |

|   |            |            |            |   |            |            |            |
|---|------------|------------|------------|---|------------|------------|------------|
| C | -3.4584180 | 5.4553500  | -1.6260600 | H | -2.6586520 | 6.0754010  | -1.2312340 |
| C | -3.4478980 | 4.0907120  | -1.3503340 | H | -2.6487110 | 3.6529690  | -0.7658280 |
| O | -3.2137340 | -2.4076770 | -0.3235650 | H | 0.3932710  | 6.6335030  | 2.2193600  |
| C | -4.4321320 | -3.0262360 | -0.2485300 | H | 2.4910250  | 5.9176680  | 1.1307510  |
| C | -5.6450530 | -2.3511130 | -0.0917550 | H | 3.7386590  | 4.2350600  | -0.2188670 |
| C | -6.8224510 | -3.0898980 | 0.0114330  | H | 5.4855670  | 2.6364810  | 0.1238050  |
| C | -6.8056750 | -4.4811630 | -0.0357680 | H | 7.6013270  | 2.1803470  | -1.0740500 |
| C | -5.5890170 | -5.1437720 | -0.1873390 | H | 7.5481910  | 1.2290630  | -3.3705570 |
| C | -4.4062320 | -4.4212000 | -0.2917930 | H | 5.3623070  | 0.7795210  | -4.4628020 |
| O | -2.2279700 | 1.4385460  | -1.4782580 | H | 3.2537190  | 1.2672870  | -3.2725100 |
| N | 0.0756300  | -1.1142010 | 1.6463630  | H | 5.6428640  | -1.3019170 | -1.2705560 |
| C | 0.9721040  | -2.0292990 | 1.7637110  | H | 7.3151000  | -1.1458670 | 0.5385950  |
| C | 1.2060980  | -3.0913260 | 0.8073500  | H | 6.6385500  | -0.3659650 | 2.8002040  |
| C | 2.3737420  | -3.8508190 | 0.9688480  | H | 4.2674470  | 0.2485750  | 3.2253130  |
| C | 2.6324080  | -4.9096140 | 0.1090210  | H | 2.6033700  | 0.1029340  | 1.4065360  |
| C | 1.7179270  | -5.2187440 | -0.8971930 | H | 3.9084480  | -2.6656450 | -1.7527250 |
| C | 0.5516700  | -4.4680930 | -1.0555010 | H | 3.1055040  | -4.0559150 | -3.6396950 |
| C | 0.2903900  | -3.3991240 | -0.2127750 | H | 1.2682950  | -4.6795360 | -5.1743520 |
| C | -0.2519280 | -0.0698700 | 2.6461710  | H | 0.0909270  | 0.8696120  | 2.2034580  |
| C | 0.4752390  | -0.2789850 | 3.9558540  | H | -0.4766200 | -1.0319370 | 0.7701480  |
| C | 0.0688030  | -1.2604040 | 4.8646540  | H | 1.5799590  | -2.0064100 | 2.6669760  |
| C | 0.7684970  | -1.4440390 | 6.0525030  | H | 3.0768300  | -3.5947910 | 1.7572020  |
| C | 1.8714420  | -0.6416800 | 6.3463320  | H | 3.5392810  | -5.4935860 | 0.2239950  |
| C | 2.2732390  | 0.3442400  | 5.4498890  | H | 1.9169370  | -6.0469110 | -1.5707470 |
| C | 1.5780720  | 0.5221480  | 4.2545930  | H | -0.1416480 | -4.6984960 | -1.8581120 |
| C | -1.7623120 | 0.0088090  | 2.7774870  | H | -0.6180060 | -2.8182100 | -0.3475570 |
| C | -2.3277820 | 1.2164770  | 3.1930990  | H | -0.8041540 | -1.8698280 | 4.6432970  |
| C | -3.7070330 | 1.3386940  | 3.3182360  | H | 1.8837330  | 1.2966910  | 3.5531860  |
| C | -4.5346100 | 0.2525070  | 3.0331990  | H | -2.1726280 | -2.0284870 | 2.1802030  |
| C | -3.9749500 | -0.9572150 | 2.6347700  | H | -1.6809200 | 2.0646490  | 3.4055180  |
| C | -2.5909150 | -1.0806860 | 2.5098670  | H | -1.5988590 | 5.1367350  | 2.2115040  |
| H | -5.6629360 | -1.2694140 | -0.0579820 | H | -1.0149300 | -1.2781780 | -3.8456250 |
| H | -7.7642830 | -2.5625390 | 0.1297750  | H | -4.1377490 | 2.2850570  | 3.6295500  |
| H | -7.7301980 | -5.0434940 | 0.0447350  | H | -5.6118850 | 0.3512870  | 3.1201090  |
| H | -5.5581420 | -6.2284520 | -0.2248560 | H | -4.6103000 | -1.8090950 | 2.4127970  |
| H | -3.4474800 | -4.9165570 | -0.4091710 | H | 3.1224800  | 0.9800800  | 5.6803400  |
| H | -6.2722130 | 3.1930670  | -3.0000080 | H | 2.4106090  | -0.7812010 | 7.2778790  |
| H | -6.2850750 | 5.6356810  | -3.4931320 | H | 0.4477890  | -2.2062550 | 6.7553330  |
| H | -4.4705650 | 7.0874250  | -2.6045550 |   |            |            |            |

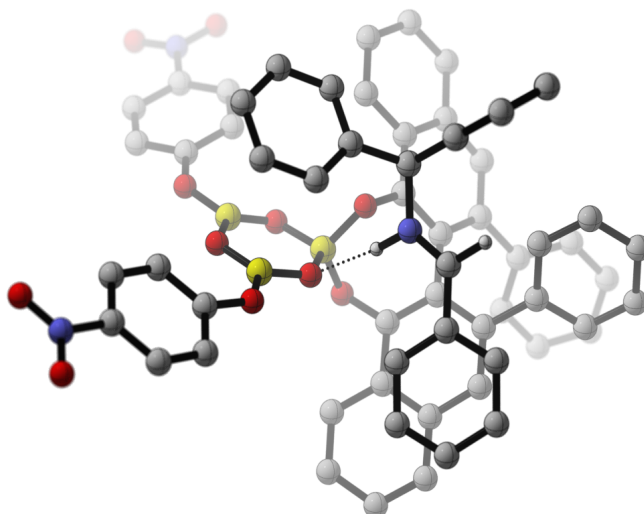

Boroxinate-H-Iminium Complex **4d**

RRHO Thermochemistry (T = 298.15)

|                                                     |                             |
|-----------------------------------------------------|-----------------------------|
| Zero-point correction (RRHO)=                       | 1.147523 (Hartree/Particle) |
| Thermal correction to Energy (RRHO)=                | 1.208703                    |
| Thermal correction to Enthalpy (RRHO)=              | 1.209647                    |
| Thermal correction to Gibbs Free Energy (RRHO)=     | 1.046810                    |
| Sum of electronic and zero-point Energies (RRHO)=   | -3530.631429                |
| Sum of electronic and thermal Energies (RRHO)=      | -3530.570249                |
| Sum of electronic and thermal Enthalpies (RRHO)=    | -3530.569305                |
| Sum of electronic and thermal Free Energies (RRHO)= | -3530.732142                |

Quasi-RRHO Thermochemistry (T = 298.15,  $\nu_0 = 100 \text{ cm}^{-1}$ )

|                                                      |                             |
|------------------------------------------------------|-----------------------------|
| Zero-point correction (QRRHO)=                       | 1.147523 (Hartree/Particle) |
| Thermal correction to Energy (QRRHO)=                | 1.208703                    |
| Thermal correction to Enthalpy (QRRHO)=              | 1.209647                    |
| Thermal correction to Gibbs Free Energy (QRRHO)=     | 1.063021                    |
| Sum of electronic and zero-point Energies (QRRHO)=   | -3530.631429                |
| Sum of electronic and thermal Energies (QRRHO)=      | -3530.570249                |
| Sum of electronic and thermal Enthalpies (QRRHO)=    | -3530.569305                |
| Sum of electronic and thermal Free Energies (QRRHO)= | -3530.715931                |

Quasi-harmonic Thermochemistry (T = 298.15, cutoff =  $100 \text{ cm}^{-1}$ )

|                                                |                             |
|------------------------------------------------|-----------------------------|
| Zero-point correction (QHO)=                   | 1.147523 (Hartree/Particle) |
| Thermal correction to Energy (QHO)=            | 1.209009                    |
| Thermal correction to Enthalpy (QHO)=          | 1.209647                    |
| Thermal correction to Gibbs Free Energy (QHO)= | 1.066733                    |

|                                                    |              |
|----------------------------------------------------|--------------|
| Sum of electronic and zero-point Energies (QHO)=   | -3530.631429 |
| Sum of electronic and thermal Energies (QHO)=      | -3530.569943 |
| Sum of electronic and thermal Enthalpies (QHO)=    | -3530.569305 |
| Sum of electronic and thermal Free Energies (QHO)= | -3530.712219 |

|   |            |            |            |   |            |            |            |
|---|------------|------------|------------|---|------------|------------|------------|
| C | 4.1431110  | -0.8235600 | 1.1098030  | C | -3.5230060 | 6.4861170  | -1.0798970 |
| C | 4.4334290  | -1.1298860 | -0.2268560 | C | -2.4483070 | 5.7383280  | -0.6137150 |
| C | 5.7337430  | -1.5423510 | -0.5439050 | C | -2.5320490 | 4.3537370  | -0.6194490 |
| C | 6.7083330  | -1.6571590 | 0.4408580  | O | -2.9383610 | -2.2089760 | -0.5494180 |
| C | 6.4026570  | -1.3647500 | 1.7684090  | C | -4.1964440 | -2.7094610 | -0.4845260 |
| C | 5.1159280  | -0.9447390 | 2.0984810  | C | -5.3357040 | -1.9430890 | -0.2046550 |
| C | 3.3853950  | -1.0874660 | -1.2807620 | C | -6.5724670 | -2.5684440 | -0.1239220 |
| C | 2.3605330  | -0.0776930 | -1.3085260 | C | -6.6572420 | -3.9411910 | -0.3188250 |
| C | 1.2845830  | -0.2482890 | -2.1715040 | C | -5.5363840 | -4.7173490 | -0.5938900 |
| C | 1.2546530  | -1.3158900 | -3.1221360 | C | -4.3037380 | -4.0929720 | -0.6740680 |
| C | 2.3521560  | -2.2093160 | -3.1852720 | O | -1.6113010 | 1.6579160  | -1.1767700 |
| C | 3.3760620  | -2.0991640 | -2.2136040 | N | 0.5657500  | -1.4834880 | 1.5127930  |
| C | 2.3449710  | -3.2358440 | -4.1652910 | C | 1.3760950  | -2.4831010 | 1.4895820  |
| C | 1.2828110  | -3.3774590 | -5.0229510 | C | 1.5072200  | -3.4180560 | 0.3919590  |
| C | 0.1731530  | -2.5005840 | -4.9356220 | C | 2.6080530  | -4.2862530 | 0.4155780  |
| C | 0.1601970  | -1.4885280 | -4.0066670 | C | 2.7608230  | -5.2327370 | -0.5885720 |
| H | -0.6647420 | -2.6269490 | -5.6142610 | C | 1.8069190  | -5.3230690 | -1.6015040 |
| C | 2.4482290  | 1.1923010  | -0.5310330 | C | 0.7061590  | -4.4645140 | -1.6227930 |
| C | 1.3318250  | 1.6305730  | 0.1625890  | C | 0.5518610  | -3.5052350 | -0.6346210 |
| C | 1.3457560  | 2.8236460  | 0.9450170  | C | 0.3179820  | -0.5723500 | 2.6556760  |
| C | 2.5397580  | 3.5828620  | 1.0151950  | C | 1.0388680  | -1.0198910 | 3.9067600  |
| C | 3.6653340  | 3.1462070  | 0.2745480  | C | 0.5643410  | -2.0939090 | 4.6648300  |
| C | 3.6372880  | 2.0036390  | -0.4942490 | C | 1.2580360  | -2.5090470 | 5.7964880  |
| C | 0.1914340  | 3.2605680  | 1.6438570  | C | 2.4236810  | -1.8473120 | 6.1834470  |
| C | 0.2279080  | 4.4139940  | 2.3895570  | C | 2.8945960  | -0.7707540 | 5.4366860  |
| C | 1.4208450  | 5.1741430  | 2.4679910  | C | 2.2050630  | -0.3603640 | 4.2966890  |
| C | 2.5474020  | 4.7686700  | 1.7961670  | C | -1.1833870 | -0.4221970 | 2.8227210  |
| H | -0.7140970 | 2.6667620  | 1.5616100  | C | -1.6736140 | 0.7537730  | 3.3950120  |
| O | 0.1991040  | 0.8948580  | 0.2097470  | C | -3.0419940 | 0.9346590  | 3.5635710  |
| B | -0.5891530 | 0.6370060  | -1.0026860 | C | -3.9337350 | -0.0628740 | 3.1693530  |
| O | 0.2504400  | 0.6200060  | -2.1881120 | C | -3.4484570 | -1.2441780 | 2.6171700  |
| C | 4.8558700  | 1.6809840  | -1.2865690 | C | -2.0760020 | -1.4244510 | 2.4433970  |
| C | 6.1160240  | 1.7613780  | -0.6827190 | H | -5.2496870 | -0.8752610 | -0.0559050 |
| C | 7.2726560  | 1.4894980  | -1.4058260 | H | -7.4702740 | -2.0018160 | 0.0904030  |
| C | 7.1870280  | 1.1297170  | -2.7486280 | H | -5.6417010 | -5.7852560 | -0.7389800 |
| C | 5.9376570  | 1.0532880  | -3.3625830 | H | -3.4015980 | -4.6568990 | -0.8845490 |
| C | 4.7813890  | 1.3292840  | -2.6395150 | H | -5.6572320 | 3.9982030  | -1.9123970 |
| O | -1.1890380 | -0.7019590 | -0.7469590 | H | -5.5019190 | 6.5046360  | -1.9115860 |
| B | -2.5225110 | -0.8941760 | -0.7179490 | H | -1.5583020 | 6.2382760  | -0.2508020 |
| O | -3.4226780 | 0.1301870  | -0.8685050 | H | -1.6977340 | 3.7572450  | -0.2762750 |
| B | -2.9168120 | 1.4124440  | -1.0455380 | H | 1.4379050  | 6.0857120  | 3.0571810  |
| O | -3.8930780 | 2.3927600  | -1.0801330 | H | 3.4613970  | 5.3546630  | 1.8456200  |
| C | -3.6966970 | 3.7357600  | -1.0907580 | H | 4.5598620  | 3.7633440  | 0.2757520  |
| C | -4.7681780 | 4.5065650  | -1.5565940 | H | 6.1802330  | 2.0004270  | 0.3755120  |
| C | -4.6857770 | 5.8885570  | -1.5553300 | H | 8.2399770  | 1.5436490  | -0.9151850 |



|   |            |            |            |   |            |            |            |
|---|------------|------------|------------|---|------------|------------|------------|
| H | 8.0873980  | 0.9120380  | -3.3152280 | H | -0.3544070 | -2.5955840 | 4.3676870  |
| H | 5.8617640  | 0.7837910  | -4.4117150 | H | 2.5640150  | 0.4859580  | 3.7133920  |
| H | 3.8114900  | 1.2727600  | -3.1254470 | H | -1.7135450 | -2.3487570 | 1.9996690  |
| H | 5.9900970  | -1.7262440 | -1.5833620 | H | -0.9767850 | 1.5316200  | 3.6984050  |
| H | 7.7144280  | -1.9612730 | 0.1678370  | H | -0.6606700 | 4.7514680  | 2.9150220  |
| H | 7.1630720  | -1.4534400 | 2.5381320  | H | -0.6719120 | -0.7966500 | -3.9365260 |
| H | 4.8661300  | -0.7123430 | 3.1298270  | H | -3.4136470 | 1.8567350  | 3.9989710  |
| H | 3.1498810  | -0.4672740 | 1.3714700  | H | -5.0020920 | 0.0802220  | 3.2959320  |
| H | 4.1391750  | -2.8720400 | -2.1770700 | H | -4.1347440 | -2.0314920 | 2.3212570  |
| H | 3.1921220  | -3.9160320 | -4.2130910 | H | 3.7938080  | -0.2451040 | 5.7427530  |
| H | 1.2865820  | -4.1652010 | -5.7704600 | H | 2.9590430  | -2.1674880 | 7.0715510  |
| H | 0.7168870  | 0.3974640  | 2.3442830  | H | 0.8851540  | -3.3424590 | 6.3830600  |
| H | 0.0246490  | -1.2264620 | 0.6680570  | N | -3.4325320 | 7.9442120  | -1.0662220 |
| H | 1.9841010  | -2.6402280 | 2.3790610  | N | -7.9633110 | -4.5915390 | -0.2268610 |
| H | 3.3428650  | -4.2023060 | 1.2120130  | O | -8.0107500 | -5.7990010 | -0.3923870 |
| H | 3.6161110  | -5.8997850 | -0.5802940 | O | -8.9305840 | -3.8948880 | 0.0295210  |
| H | 1.9234700  | -6.0634240 | -2.3872090 | O | -4.3867050 | 8.5794170  | -1.4845020 |
| H | -0.0169510 | -4.5234780 | -2.4301040 | O | -2.4094170 | 8.4495580  | -0.6352330 |
| H | -0.3053990 | -2.8380420 | -0.6634330 |   |            |            |            |

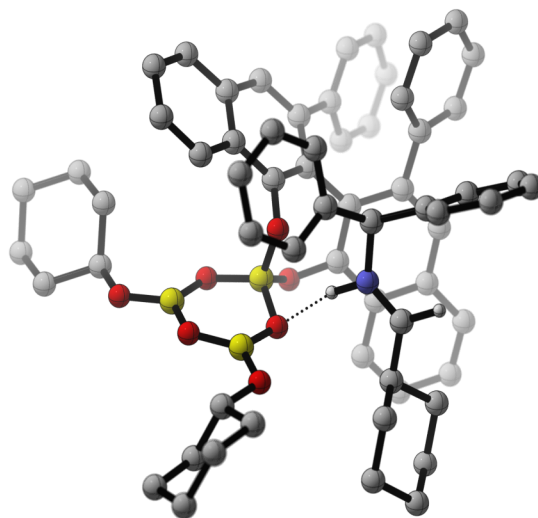

Boroxinate-H-Iminium Complex **4e**

File Name: catim4e

RRHO Thermochemistry (T = 298)

|                                                   |                             |
|---------------------------------------------------|-----------------------------|
| Zero-point correction (RRHO)=                     | 1.197594 (Hartree/Particle) |
| Thermal correction to Energy (RRHO)=              | 1.260170                    |
| Thermal correction to Enthalpy (RRHO)=            | 1.261114                    |
| Thermal correction to Gibbs Free Energy (RRHO)=   | 1.096845                    |
| Sum of electronic and zero-point Energies (RRHO)= | -3132.564481                |

|                                                     |              |
|-----------------------------------------------------|--------------|
| Sum of electronic and thermal Energies (RRHO)=      | -3132.501905 |
| Sum of electronic and thermal Enthalpies (RRHO)=    | -3132.500961 |
| Sum of electronic and thermal Free Energies (RRHO)= | -3132.665230 |

Quasi-RRHO Thermochemistry (T = 298, v0 = 100 cm-1)

|                                                      |                             |
|------------------------------------------------------|-----------------------------|
| Zero-point correction (QRRHO)=                       | 1.197594 (Hartree/Particle) |
| Thermal correction to Energy (QRRHO)=                | 1.260170                    |
| Thermal correction to Enthalpy (QRRHO)=              | 1.261114                    |
| Thermal correction to Gibbs Free Energy (QRRHO)=     | 1.113037                    |
| Sum of electronic and zero-point Energies (QRRHO)=   | -3132.564481                |
| Sum of electronic and thermal Energies (QRRHO)=      | -3132.501905                |
| Sum of electronic and thermal Enthalpies (QRRHO)=    | -3132.500961                |
| Sum of electronic and thermal Free Energies (QRRHO)= | -3132.649038                |

Quasi-harmonic Thermochemistry (T = 298, cutoff = 100 cm-1)

|                                                    |                             |
|----------------------------------------------------|-----------------------------|
| Zero-point correction (QHO)=                       | 1.197594 (Hartree/Particle) |
| Thermal correction to Energy (QHO)=                | 1.260497                    |
| Thermal correction to Enthalpy (QHO)=              | 1.261114                    |
| Thermal correction to Gibbs Free Energy (QHO)=     | 1.116060                    |
| Sum of electronic and zero-point Energies (QHO)=   | -3132.564481                |
| Sum of electronic and thermal Energies (QHO)=      | -3132.501578                |
| Sum of electronic and thermal Enthalpies (QHO)=    | -3132.500961                |
| Sum of electronic and thermal Free Energies (QHO)= | -3132.646015                |

|   |            |            |            |   |            |            |            |
|---|------------|------------|------------|---|------------|------------|------------|
| C | 4.0065340  | -0.8522870 | 1.4627390  | C | 3.4320480  | 1.8116670  | -0.1312470 |
| C | 4.2045610  | -1.2995620 | 0.1496420  | C | -0.0780500 | 2.9055670  | 2.0035290  |
| C | 5.4795150  | -1.7524910 | -0.2116340 | C | -0.0628570 | 4.0023720  | 2.8287460  |
| C | 6.5236790  | -1.7602080 | 0.7068720  | C | 1.1058560  | 4.7953790  | 2.9401700  |
| C | 6.3129770  | -1.3150470 | 2.0094150  | C | 2.2440720  | 4.4606490  | 2.2480570  |
| C | 5.0494350  | -0.8618480 | 2.3834360  | H | -0.9644070 | 2.2850900  | 1.9008520  |
| C | 3.1040720  | -1.3393270 | -0.8556830 | O | -0.0590830 | 0.7446250  | 0.2377450  |
| C | 2.1651440  | -0.2635630 | -1.0238040 | B | -0.7067790 | 0.9060760  | -1.0932210 |
| C | 1.1304480  | -0.4123280 | -1.9433880 | O | 0.2327340  | 0.5658510  | -2.1554960 |
| C | 1.0294490  | -1.5775520 | -2.7682840 | C | 4.6762360  | 1.4966230  | -0.8823620 |
| C | 1.9949760  | -2.6067970 | -2.6282970 | C | 5.9172540  | 1.5766270  | -0.2400540 |
| C | 2.9996540  | -2.4701600 | -1.6387080 | C | 7.0932100  | 1.2870110  | -0.9236710 |
| C | 1.9268140  | -3.7314170 | -3.4942350 | C | 7.0476090  | 0.9118620  | -2.2643000 |
| C | 0.9574780  | -3.8113130 | -4.4636900 | C | 5.8181500  | 0.8397890  | -2.9172670 |
| C | -0.0080750 | -2.7827720 | -4.5950500 | C | 4.6419090  | 1.1324160  | -2.2338310 |
| C | 0.0178760  | -1.6944730 | -3.7563980 | O | -1.8173480 | -0.0759620 | -1.0261540 |
| H | -0.7717150 | -2.8599330 | -5.3632330 | B | -3.0144400 | 0.3504700  | -0.5324280 |
| C | 2.2457340  | 1.0108520  | -0.2522040 | O | -3.3161910 | 1.6863820  | -0.4072720 |
| C | 1.0953230  | 1.4257270  | 0.3995210  | B | -2.4009800 | 2.6275930  | -0.8839890 |
| C | 1.0843240  | 2.5496010  | 1.2753170  | O | -2.8344640 | 3.9191120  | -0.9188480 |
| C | 2.2690630  | 3.3165740  | 1.4071050  | O | -3.9223630 | -0.6070950 | -0.1478290 |
| C | 3.4203740  | 2.9278280  | 0.6761510  | O | -1.1754630 | 2.2517630  | -1.3095180 |

|   |            |            |            |   |            |            |            |
|---|------------|------------|------------|---|------------|------------|------------|
| N | -0.6575860 | -2.0517990 | 0.6050720  | H | -2.1316810 | -2.4206810 | -1.4145170 |
| C | -1.0657520 | -3.2027500 | 0.2272270  | C | -2.4991270 | -4.6149130 | -3.0232570 |
| C | 0.2065880  | -1.7437630 | 1.7648370  | H | -1.3632960 | -5.3954410 | -1.3544430 |
| C | 0.7143450  | -3.0072410 | 2.4293570  | H | -0.5138490 | -4.1461010 | -2.2780560 |
| C | 0.0331640  | -3.5900350 | 3.5003770  | C | -4.3801350 | -3.9876270 | -1.4533360 |
| C | 0.4993980  | -4.7759480 | 4.0620690  | H | -3.2505370 | -4.7637890 | 0.2237770  |
| C | 1.6478530  | -5.3839440 | 3.5589090  | H | -3.7216490 | -3.0587130 | 0.3924900  |
| C | 2.3286940  | -4.8070180 | 2.4889120  | C | -3.8823740 | -4.9991980 | -2.4903950 |
| C | 1.8615040  | -3.6238580 | 1.9237260  | H | -2.1326480 | -5.3684110 | -3.7289170 |
| C | -0.5228900 | -0.7966170 | 2.7028260  | H | -2.5687520 | -3.6688570 | -3.5760220 |
| C | 0.2335140  | -0.1321700 | 3.6700780  | H | -5.3454910 | -4.3048250 | -1.0433180 |
| C | -0.3781900 | 0.7362970  | 4.5668150  | H | -4.5368140 | -3.0091240 | -1.9271240 |
| C | -1.7541460 | 0.9524750  | 4.5034020  | H | -4.5978510 | -5.0766460 | -3.3156210 |
| C | -2.5109660 | 0.2934430  | 3.5394470  | H | -3.8258630 | -5.9921150 | -2.0230500 |
| C | -1.8998090 | -0.5836860 | 2.6428090  | C | -1.9759780 | 4.9370310  | -1.4329020 |
| H | 1.1004500  | 5.6707250  | 3.5830000  | C | -2.8498280 | 6.1284930  | -1.8058320 |
| H | 3.1441620  | 5.0635850  | 2.3374140  | C | -0.9177840 | 5.3280040  | -0.4062670 |
| H | 4.3078880  | 3.5529650  | 0.7321050  | H | -1.4701020 | 4.5584320  | -2.3327370 |
| H | 5.9500450  | 1.8246870  | 0.8173290  | C | -2.0014590 | 7.2979100  | -2.3118160 |
| H | 8.0449730  | 1.3373170  | -0.4027700 | H | -3.4072570 | 6.4327440  | -0.9093450 |
| H | 7.9638130  | 0.6787430  | -2.7985880 | H | -3.5865470 | 5.8197890  | -2.5556270 |
| H | 5.7737590  | 0.5605740  | -3.9657640 | C | -0.0712340 | 6.5030220  | -0.9015750 |
| H | 3.6872720  | 1.0835780  | -2.7494250 | H | -1.4310610 | 5.6013130  | 0.5265610  |
| H | 5.6596380  | -2.0564980 | -1.2387450 | H | -0.2853900 | 4.4618890  | -0.1900170 |
| H | 7.5086360  | -2.0971610 | 0.3975820  | C | -0.9473250 | 7.7006510  | -1.2767300 |
| H | 7.1277140  | -1.3151520 | 2.7270900  | H | -2.6448520 | 8.1494460  | -2.5584180 |
| H | 4.8730190  | -0.5123520 | 3.3963390  | H | -1.4958510 | 7.0032070  | -3.2420000 |
| H | 3.0334700  | -0.4746040 | 1.7642530  | H | 0.6591690  | 6.7791690  | -0.1331130 |
| H | 3.7039920  | -3.2859940 | -1.4960130 | H | 0.5032510  | 6.1872480  | -1.7833710 |
| H | 2.6693070  | -4.5181890 | -3.3868380 | H | -0.3313570 | 8.5217830  | -1.6602250 |
| H | 0.9253870  | -4.6665400 | -5.1322250 | H | -1.4538790 | 8.0737720  | -0.3755690 |
| H | 1.0508960  | -1.2033250 | 1.3209880  | C | -5.2015030 | -0.1988680 | 0.3389750  |
| H | -0.9860160 | -1.2229540 | 0.0625750  | C | -6.1287350 | 0.1522510  | -0.8204530 |
| H | -0.7267560 | -4.0708330 | 0.7942630  | C | -5.7826610 | -1.3311320 | 1.1756540  |
| H | -0.8539770 | -3.1067280 | 3.9003540  | H | -5.0751080 | 0.6911540  | 0.9713830  |
| H | 2.3861180  | -3.1728130 | 1.0844880  | C | -7.5240030 | 0.5226160  | -0.3096000 |
| H | -2.5096480 | -1.0802480 | 1.8916450  | H | -6.1910940 | -0.7230590 | -1.4824720 |
| H | 1.3075800  | -0.2983630 | 3.7185750  | H | -5.6920330 | 0.9753130  | -1.3952380 |
| H | -0.9520260 | 4.2713800  | 3.3913520  | C | -7.1721470 | -0.9598170 | 1.7013580  |
| H | -0.7104930 | -0.8951170 | -3.8405380 | H | -5.8556610 | -2.2260870 | 0.5410820  |
| H | 0.2222810  | 1.2573030  | 5.3056890  | H | -5.0994300 | -1.5698840 | 2.0007880  |
| H | -2.2307550 | 1.6374070  | 5.1976290  | C | -8.1138010 | -0.5992920 | 0.5488620  |
| H | -3.5826530 | 0.4594260  | 3.4776890  | H | -8.1841750 | 0.7482420  | -1.1534000 |
| H | 3.2272330  | -5.2727800 | 2.0970870  | H | -7.4549810 | 1.4393930  | 0.2915820  |
| H | 2.0138060  | -6.3041770 | 4.0033850  | H | -7.5834360 | -1.7855700 | 2.2912380  |
| H | -0.0313020 | -5.2211140 | 4.8976530  | H | -7.0845010 | -0.0987270 | 2.3783570  |
| C | -2.0086010 | -3.3823840 | -0.9005290 | H | -9.0949590 | -0.3065670 | 0.9377990  |
| C | -1.4914490 | -4.4411180 | -1.8859500 | H | -8.2699980 | -1.4884040 | -0.0776810 |
| C | -3.3720400 | -3.8140980 | -0.3166460 |   |            |            |            |

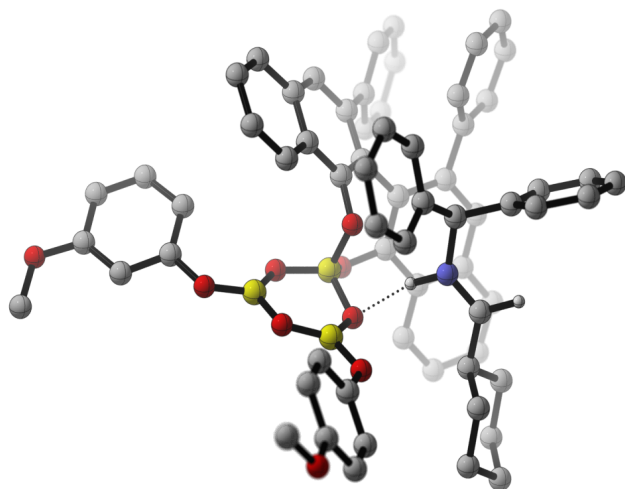

Boroxinate-H-Iminium Complex **4f**

File Name: catim4f

RRHO Thermochemistry (T = 298)

|                                                     |                             |
|-----------------------------------------------------|-----------------------------|
| Zero-point correction (RRHO)=                       | 1.121538 (Hartree/Particle) |
| Thermal correction to Energy (RRHO)=                | 1.186641                    |
| Thermal correction to Enthalpy (RRHO)=              | 1.187584                    |
| Thermal correction to Gibbs Free Energy (RRHO)=     | 1.017359                    |
| Sum of electronic and zero-point Energies (RRHO)=   | -3354.365852                |
| Sum of electronic and thermal Energies (RRHO)=      | -3354.300749                |
| Sum of electronic and thermal Enthalpies (RRHO)=    | -3354.299806                |
| Sum of electronic and thermal Free Energies (RRHO)= | -3354.470031                |

Quasi-RRHO Thermochemistry (T = 298,  $\nu_0 = 100 \text{ cm}^{-1}$ )

|                                                      |                             |
|------------------------------------------------------|-----------------------------|
| Zero-point correction (QRRHO)=                       | 1.121538 (Hartree/Particle) |
| Thermal correction to Energy (QRRHO)=                | 1.186641                    |
| Thermal correction to Enthalpy (QRRHO)=              | 1.187584                    |
| Thermal correction to Gibbs Free Energy (QRRHO)=     | 1.034260                    |
| Sum of electronic and zero-point Energies (QRRHO)=   | -3354.365852                |
| Sum of electronic and thermal Energies (QRRHO)=      | -3354.300749                |
| Sum of electronic and thermal Enthalpies (QRRHO)=    | -3354.299806                |
| Sum of electronic and thermal Free Energies (QRRHO)= | -3354.453130                |

Quasi-harmonic Thermochemistry (T = 298, cutoff =  $100 \text{ cm}^{-1}$ )

|                              |                             |
|------------------------------|-----------------------------|
| Zero-point correction (QHO)= | 1.121538 (Hartree/Particle) |
|------------------------------|-----------------------------|

|                                                    |            |            |              |            |            |            |            |
|----------------------------------------------------|------------|------------|--------------|------------|------------|------------|------------|
| Thermal correction to Energy (QHO)=                |            |            | 1.186971     |            |            |            |            |
| Thermal correction to Enthalpy (QHO)=              |            |            | 1.187584     |            |            |            |            |
| Thermal correction to Gibbs Free Energy (QHO)=     |            |            | 1.037408     |            |            |            |            |
| Sum of electronic and zero-point Energies (QHO)=   |            |            | -3354.365852 |            |            |            |            |
| Sum of electronic and thermal Energies (QHO)=      |            |            | -3354.300419 |            |            |            |            |
| Sum of electronic and thermal Enthalpies (QHO)=    |            |            | -3354.299806 |            |            |            |            |
| Sum of electronic and thermal Free Energies (QHO)= |            |            | -3354.449982 |            |            |            |            |
|                                                    |            |            | C            | -3.0885490 | 4.2285550  | -0.9687940 |            |
|                                                    |            |            | C            | -4.0682220 | 5.0934660  | -1.4647080 |            |
| C                                                  | 4.2178940  | 0.0172990  | 1.7399500    | C          | -3.7831930 | 6.4515870  | -1.5853540 |
| C                                                  | 4.6576220  | -0.1931010 | 0.4269190    | C          | -2.5286820 | 6.9430150  | -1.2078040 |
| C                                                  | 6.0365120  | -0.2288300 | 0.1861800    | C          | -1.5756270 | 6.0642850  | -0.7163000 |
| C                                                  | 6.9478830  | -0.0592830 | 1.2229610    | C          | -1.8363970 | 4.6995450  | -0.5882460 |
| C                                                  | 6.4973660  | 0.1478670  | 2.5243340    | O          | -3.1627740 | -1.7915490 | -0.7017550 |
| C                                                  | 5.1278630  | 0.1844810  | 2.7786870    | C          | -4.4011030 | -2.0018820 | -0.1399400 |
| C                                                  | 3.7108480  | -0.4126860 | -0.7030450   | C          | -4.8910720 | -1.2331240 | 0.9091760  |
| C                                                  | 2.5231790  | 0.3766480  | -0.8869240   | C          | -6.1244230 | -1.5379330 | 1.4876660  |
| C                                                  | 1.6651240  | 0.0626700  | -1.9368720   | C          | -6.8685880 | -2.6195840 | 1.0165290  |
| C                                                  | 1.9653140  | -0.9900550 | -2.8571520   | C          | -6.3707500 | -3.3894880 | -0.0399860 |
| C                                                  | 3.1632510  | -1.7301460 | -2.6893330   | C          | -5.1477570 | -3.0820650 | -0.6140500 |
| C                                                  | 4.0007380  | -1.4317520 | -1.5862780   | O          | -1.3708350 | 1.8753090  | -1.3439990 |
| C                                                  | 3.4805650  | -2.7421030 | -3.6349910   | N          | 0.1405840  | -2.3170320 | 0.2917840  |
| C                                                  | 2.6519160  | -2.9877050 | -4.7020440   | C          | 0.0425750  | -3.5045090 | -0.1718970 |
| C                                                  | 1.4546280  | -2.2471810 | -4.8624140   | C          | 0.8262870  | -1.8963460 | 1.5342580  |
| C                                                  | 1.1108210  | -1.2762700 | -3.9530650   | C          | 1.6229260  | -3.0342800 | 2.1413280  |
| H                                                  | 0.8078320  | -2.4522460 | -5.7102010   | C          | 1.0797010  | -3.8613940 | 3.1268020  |
| C                                                  | 2.1554390  | 1.5183880  | 0.0009240    | C          | 1.8237600  | -4.9236660 | 3.6345730  |
| C                                                  | 0.8737490  | 1.5176390  | 0.5276880    | C          | 3.1133330  | -5.1620890 | 3.1642100  |
| C                                                  | 0.4321250  | 2.5029720  | 1.4564690    | C          | 3.6587700  | -4.3389020 | 2.1809780  |
| C                                                  | 1.3204150  | 3.5525640  | 1.8008980    | C          | 2.9149260  | -3.2800330 | 1.6688510  |
| C                                                  | 2.6126070  | 3.5743160  | 1.2171490    | C          | -0.1661880 | -1.2596970 | 2.4900890  |
| C                                                  | 3.0366360  | 2.6008230  | 0.3394990    | C          | 0.3460780  | -0.4266180 | 3.4870160  |
| C                                                  | -0.8691620 | 2.4599500  | 2.0181230    | C          | -0.4986450 | 0.1470530  | 4.4293160  |
| C                                                  | -1.2773030 | 3.4442780  | 2.8829570    | C          | -1.8676120 | -0.1133660 | 4.3888630  |
| C                                                  | -0.4044250 | 4.5100920  | 3.2143540    | C          | -2.3825750 | -0.9431200 | 3.3980790  |
| C                                                  | 0.8636670  | 4.5612730  | 2.6907300    | C          | -1.5369300 | -1.5128630 | 2.4441310  |
| H                                                  | -1.5178800 | 1.6260000  | 1.7616820    | H          | -4.3200380 | -0.3840620 | 1.2662040  |
| O                                                  | -0.0073220 | 0.5571560  | 0.1661560    | H          | -6.4889160 | -0.9178040 | 2.2982370  |
| B                                                  | -0.5379930 | 0.6985590  | -1.2167540   | H          | -6.9646820 | -4.2237250 | -0.3982210 |
| O                                                  | 0.5511060  | 0.7828290  | -2.1724040   | H          | -4.7590720 | -3.6698410 | -1.4400300 |
| C                                                  | 4.3901840  | 2.7336340  | -0.2617010   | H          | -5.0274300 | 4.6725950  | -1.7394780 |
| C                                                  | 5.4820680  | 3.0718750  | 0.5456320    | H          | -2.3319820 | 8.0046220  | -1.3101760 |
| C                                                  | 6.7551370  | 3.2045820  | 0.0016640    | H          | -0.6015020 | 6.4420190  | -0.4206220 |
| C                                                  | 6.9568410  | 3.0018550  | -1.3615800   | H          | -1.0845310 | 4.0189730  | -0.2104760 |
| C                                                  | 5.8742330  | 2.6758060  | -2.1768890   | H          | -0.7442640 | 5.2899900  | 3.8890130  |
| C                                                  | 4.6001770  | 2.5449400  | -1.6329630   | H          | 1.5360620  | 5.3761670  | 2.9463770  |
| O                                                  | -1.3163960 | -0.5547610 | -1.3853540   | H          | 3.2694520  | 4.4115420  | 1.4390660  |
| B                                                  | -2.5949470 | -0.5511210 | -0.9294420   | H          | 5.3328350  | 3.1866560  | 1.6158220  |
| O                                                  | -3.2883270 | 0.6083160  | -0.6949430   | H          | 7.5934730  | 3.4497030  | 0.6472350  |
| B                                                  | -2.6579030 | 1.8226870  | -0.9675130   | H          | 7.9508790  | 3.0994150  | -1.7876690 |
| O                                                  | -3.4742530 | 2.9195650  | -0.8329010   | H          | 6.0199250  | 2.5290590  | -3.2429430 |

|   |            |            |            |   |            |            |            |
|---|------------|------------|------------|---|------------|------------|------------|
| H | 3.7576890  | 2.3006340  | -2.2733870 | C | -1.8516140 | -4.7532120 | -1.1380590 |
| H | 6.3914620  | -0.3451050 | -0.8338320 | H | -1.0195280 | -2.8985850 | -1.8935020 |
| H | 8.0125620  | -0.0707170 | 1.0093580  | C | -0.3729440 | -4.9039000 | -3.6919680 |
| H | 7.2071020  | 0.2853360  | 3.3343730  | H | 0.7343030  | -5.4214550 | -1.9079460 |
| H | 4.7644220  | 0.3441480  | 3.7895130  | H | 1.1814110  | -3.8535720 | -2.5998210 |
| H | 3.1534210  | 0.0719210  | 1.9482510  | C | -2.5506210 | -5.1338390 | -2.4444530 |
| H | 4.8920210  | -2.0349220 | -1.4312750 | H | -1.4888490 | -5.6616360 | -0.6365120 |
| H | 4.3999840  | -3.3074300 | -3.5056110 | H | -2.5485930 | -4.2513030 | -0.4592440 |
| H | 2.9112470  | -3.7527950 | -5.4278200 | C | -1.5808820 | -5.8034420 | -3.4216360 |
| H | 1.5171780  | -1.1186070 | 1.1885280  | H | 0.3383250  | -5.3959210 | -4.3643280 |
| H | -0.3051080 | -1.5475260 | -0.2485120 | H | -0.7045440 | -3.9871080 | -4.1963210 |
| H | 0.5067840  | -4.3074770 | 0.4026890  | H | -3.3980910 | -5.7936560 | -2.2286560 |
| H | 0.0800640  | -3.6647180 | 3.5044320  | H | -2.9580520 | -4.2225480 | -2.9037490 |
| H | 3.3351100  | -2.6369230 | 0.8984550  | H | -2.0939410 | -6.0416970 | -4.3589720 |
| H | -1.9598040 | -2.1502090 | 1.6700680  | H | -1.2375510 | -6.7553040 | -2.9935330 |
| H | 1.4152280  | -0.2300530 | 3.5248660  | O | -4.6668290 | 7.3731660  | -2.0584020 |
| H | -2.2739470 | 3.4121170  | 3.3123740  | O | -8.0776120 | -3.0007930 | 1.5126960  |
| H | 0.1993120  | -0.6978220 | -4.0569820 | C | -5.9382660 | 6.9079390  | -2.4579180 |
| H | -0.0899380 | 0.8063910  | 5.1883300  | H | -6.4776230 | 6.4520100  | -1.6191490 |
| H | -2.5291240 | 0.3325950  | 5.1248170  | H | -6.4857240 | 7.7829090  | -2.8080950 |
| H | -3.4460560 | -1.1589230 | 3.3621420  | H | -5.8574010 | 6.1780900  | -3.2720520 |
| H | 4.6658150  | -4.5151530 | 1.8168290  | C | -8.6184190 | -2.2275380 | 2.5631300  |
| H | 3.6945240  | -5.9855340 | 3.5672700  | H | -9.5786740 | -2.6796110 | 2.8099360  |
| H | 1.3977910  | -5.5601680 | 4.4035600  | H | -7.9693360 | -2.2465410 | 3.4468620  |
| C | -0.6556100 | -3.8273030 | -1.4378300 | H | -8.7738200 | -1.1876650 | 2.2522990  |
| C | 0.3367150  | -4.5183960 | -2.3936110 |   |            |            |            |

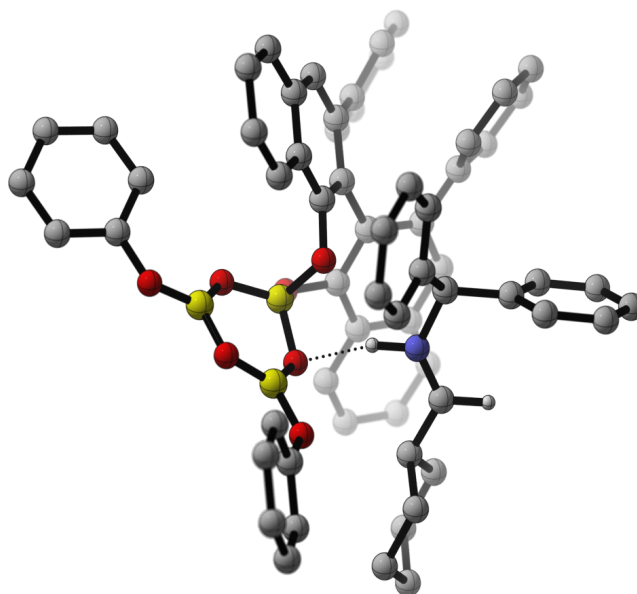

Boroxinate-H-Iminium Complex **4g**

File Name: catim4g

RRHO Thermochemistry (T = 298)

|                                                     |                             |
|-----------------------------------------------------|-----------------------------|
| Zero-point correction (RRHO)=                       | 1.055343 (Hartree/Particle) |
| Thermal correction to Energy (RRHO)=                | 1.115177                    |
| Thermal correction to Enthalpy (RRHO)=              | 1.116121                    |
| Thermal correction to Gibbs Free Energy (RRHO)=     | 0.958917                    |
| Sum of electronic and zero-point Energies (RRHO)=   | -3125.476145                |
| Sum of electronic and thermal Energies (RRHO)=      | -3125.416311                |
| Sum of electronic and thermal Enthalpies (RRHO)=    | -3125.415367                |
| Sum of electronic and thermal Free Energies (RRHO)= | -3125.572571                |

Quasi-RRHO Thermochemistry (T = 298,  $\nu_0 = 100 \text{ cm}^{-1}$ )

|                                                      |                             |
|------------------------------------------------------|-----------------------------|
| Zero-point correction (QRRHO)=                       | 1.055343 (Hartree/Particle) |
| Thermal correction to Energy (QRRHO)=                | 1.115177                    |
| Thermal correction to Enthalpy (QRRHO)=              | 1.116121                    |
| Thermal correction to Gibbs Free Energy (QRRHO)=     | 0.973475                    |
| Sum of electronic and zero-point Energies (QRRHO)=   | -3125.476145                |
| Sum of electronic and thermal Energies (QRRHO)=      | -3125.416311                |
| Sum of electronic and thermal Enthalpies (QRRHO)=    | -3125.415367                |
| Sum of electronic and thermal Free Energies (QRRHO)= | -3125.558013                |

Quasi-harmonic Thermochemistry (T = 298, cutoff = 100 cm<sup>-1</sup>)

Zero-point correction (QHO)= 1.055343 (Hartree/Particle)  
 Thermal correction to Energy (QHO)= 1.115476  
 Thermal correction to Enthalpy (QHO)= 1.116121  
 Thermal correction to Gibbs Free Energy (QHO)= 0.975490  
 Sum of electronic and zero-point Energies (QHO)= -3125.476145  
 Sum of electronic and thermal Energies (QHO)= -3125.416012  
 Sum of electronic and thermal Enthalpies (QHO)= -3125.415367  
 Sum of electronic and thermal Free Energies (QHO)= -3125.555998

|   |            |            |            |   |            |            |            |
|---|------------|------------|------------|---|------------|------------|------------|
| C | 3.6868120  | -0.9045980 | 1.6846450  | O | -3.2516060 | 1.8847670  | -0.7936300 |
| C | 3.9695290  | -1.4368290 | 0.4203850  | B | -2.2512770 | 2.7520680  | -1.2366310 |
| C | 5.2451500  | -1.9677410 | 0.1933800  | O | -2.6056360 | 4.0775000  | -1.2011930 |
| C | 6.2081850  | -1.9678750 | 1.1967250  | C | -1.7987150 | 5.1480920  | -1.4901600 |
| C | 5.9134710  | -1.4375900 | 2.4502940  | C | -2.4447000 | 6.2978820  | -1.9438170 |
| C | 4.6478940  | -0.9062400 | 2.6902870  | C | -1.7097540 | 7.4483750  | -2.2090400 |
| C | 2.9519180  | -1.4854190 | -0.6674710 | C | -0.3293070 | 7.4593440  | -2.0193420 |
| C | 2.0895600  | -0.3769130 | -0.9746740 | C | 0.3058430  | 6.3067170  | -1.5634380 |
| C | 1.1281500  | -0.5303360 | -1.9697360 | C | -0.4166350 | 5.1463560  | -1.2972850 |
| C | 1.0157100  | -1.7441370 | -2.7178370 | O | -3.9945750 | -0.3827680 | -0.4975100 |
| C | 1.9022200  | -2.8136170 | -2.4323510 | C | -5.1902790 | -0.0802900 | 0.1045180  |
| C | 2.8427360  | -2.6589380 | -1.3841560 | C | -5.3169780 | 0.9424890  | 1.0449140  |
| C | 1.8147850  | -4.0006440 | -3.2086080 | C | -6.5445560 | 1.1438510  | 1.6706940  |
| C | 0.9018570  | -4.1041720 | -4.2291010 | C | -7.6391840 | 0.3361320  | 1.3704410  |
| C | 0.0182820  | -3.0325600 | -4.5089380 | C | -7.5013470 | -0.6805580 | 0.4282830  |
| C | 0.0646330  | -1.8804480 | -3.7619260 | C | -6.2806830 | -0.8912810 | -0.2058710 |
| H | -0.6988580 | -3.1275170 | -5.3187540 | O | -1.0660790 | 2.2879350  | -1.6663170 |
| C | 2.1670560  | 0.9376210  | -0.2720160 | N | -1.0026680 | -1.8853880 | 0.5935910  |
| C | 0.9845580  | 1.4440250  | 0.2424780  | C | -1.5213450 | -3.0193740 | 0.3113420  |
| C | 0.9362170  | 2.6491780  | 0.9990540  | C | -0.1546230 | -1.5550590 | 1.7610980  |
| C | 2.1350400  | 3.3854080  | 1.1717690  | C | 0.2359670  | -2.7983820 | 2.5352600  |
| C | 3.3335780  | 2.8834410  | 0.6035320  | C | -0.5058010 | -3.2373630 | 3.6340300  |
| C | 3.3718450  | 1.7005790  | -0.1020490 | C | -0.1414450 | -4.4046910 | 4.3008490  |
| C | -0.2796310 | 3.1301570  | 1.5478040  | C | 0.9659890  | -5.1357570 | 3.8765100  |
| C | -0.3022160 | 4.3211750  | 2.2287590  | C | 1.7085820  | -4.7008990 | 2.7804500  |
| C | 0.8863670  | 5.0769160  | 2.3843260  | C | 1.3432660  | -3.5373700 | 2.1099710  |
| C | 2.0757940  | 4.6189380  | 1.8739790  | C | -0.8224740 | -0.4862440 | 2.6067990  |
| H | -1.1773700 | 2.5281050  | 1.4303840  | C | -0.0070910 | 0.2612050  | 3.4592530  |
| O | -0.1816760 | 0.7940140  | 0.0240850  | C | -0.5582250 | 1.2190510  | 4.3014980  |
| B | -0.6944840 | 0.9207470  | -1.3677870 | C | -1.9356310 | 1.4340620  | 4.3060180  |
| O | 0.3092230  | 0.4810170  | -2.3188790 | C | -2.7522560 | 0.6914010  | 3.4593280  |
| C | 4.6653060  | 1.2785800  | -0.7024090 | C | -2.1993900 | -0.2642480 | 2.6044670  |
| C | 5.8406140  | 1.3518610  | 0.0538440  | H | -4.4669800 | 1.5773510  | 1.2655160  |
| C | 7.0615110  | 0.9660370  | -0.4891340 | H | -6.6423210 | 1.9444740  | 2.3978670  |
| C | 7.1268970  | 0.5000120  | -1.8000880 | H | -8.5918620 | 0.5004130  | 1.8630390  |
| C | 5.9642050  | 0.4340160  | -2.5661570 | H | -8.3476710 | -1.3140280 | 0.1811150  |
| C | 4.7430430  | 0.8224700  | -2.0237760 | H | -6.1575620 | -1.6744960 | -0.9476210 |
| O | -1.8700730 | 0.0146480  | -1.3528300 | H | -3.5212230 | 6.2689160  | -2.0780310 |
| B | -3.0331770 | 0.5349320  | -0.8867200 | H | -2.2202400 | 8.3388480  | -2.5635580 |



|   |            |            |            |   |            |            |            |
|---|------------|------------|------------|---|------------|------------|------------|
| H | 0.2448580  | 8.3573290  | -2.2242330 | H | -1.2336080 | 4.6913360  | 2.6460160  |
| H | 1.3805800  | 6.3006090  | -1.4069070 | H | -0.6025500 | -1.0486590 | -3.9598360 |
| H | 0.0832430  | 4.2511500  | -0.9498950 | H | 0.0885100  | 1.8054590  | 4.9462750  |
| H | 0.8522100  | 6.0249660  | 2.9124050  | H | -2.3686310 | 2.1806260  | 4.9641850  |
| H | 2.9893250  | 5.1953360  | 1.9958460  | H | -3.8269110 | 0.8457340  | 3.4601460  |
| H | 4.2396490  | 3.4773730  | 0.6927300  | H | 2.5769720  | -5.2621730 | 2.4508430  |
| H | 5.7831210  | 1.6742450  | 1.0899430  | H | 1.2532030  | -6.0406460 | 4.4028130  |
| H | 7.9601450  | 1.0132970  | 0.1190280  | H | -0.7190350 | -4.7380770 | 5.1570960  |
| H | 8.0780190  | 0.1924860  | -2.2243190 | C | -2.3488260 | -3.2564560 | -0.8940500 |
| H | 6.0079500  | 0.0848810  | -3.5934890 | C | -1.7032550 | -4.3794030 | -1.7292870 |
| H | 3.8415300  | 0.7788910  | -2.6278130 | C | -3.7754880 | -3.6536480 | -0.4633820 |
| H | 5.4930190  | -2.3409150 | -0.7961980 | H | -2.3910760 | -2.3344000 | -1.4863690 |
| H | 7.1971220  | -2.3671270 | 0.9919900  | C | -2.5637390 | -4.6756080 | -2.9580000 |
| H | 6.6653140  | -1.4325210 | 3.2335310  | H | -1.6190820 | -5.2846710 | -1.1106350 |
| H | 4.4062890  | -0.4905270 | 3.6640200  | H | -0.6917760 | -4.0875260 | -2.0289360 |
| H | 2.7122800  | -0.4656930 | 1.8771470  | C | -4.6244840 | -3.9500400 | -1.7010100 |
| H | 3.4871720  | -3.4984740 | -1.1348820 | H | -3.7261120 | -4.5492820 | 0.1721710  |
| H | 2.4951790  | -4.8193240 | -2.9883550 | H | -4.2232750 | -2.8479090 | 0.1272640  |
| H | 0.8532630  | -5.0099740 | -4.8261770 | C | -3.9936350 | -5.0485920 | -2.5605410 |
| H | 0.7419610  | -1.1206000 | 1.3042700  | H | -2.0995180 | -5.4762130 | -3.5441220 |
| H | -1.1826220 | -1.0933870 | -0.0550970 | H | -2.5821530 | -3.7835430 | -3.5973240 |
| H | -1.3300090 | -3.8432750 | 1.0004810  | H | -5.6362450 | -4.2347530 | -1.3922330 |
| H | -1.3593020 | -2.6575540 | 3.9744300  | H | -4.7135930 | -3.0297360 | -2.2946540 |
| H | 1.9185430  | -3.1954780 | 1.2521050  | H | -4.6018080 | -5.2249390 | -3.4536290 |
| H | -2.8531230 | -0.8277940 | 1.9414540  | H | -3.9801500 | -5.9884490 | -1.9915930 |
| H | 1.0666770  | 0.0876000  | 3.4632810  |   |            |            |            |

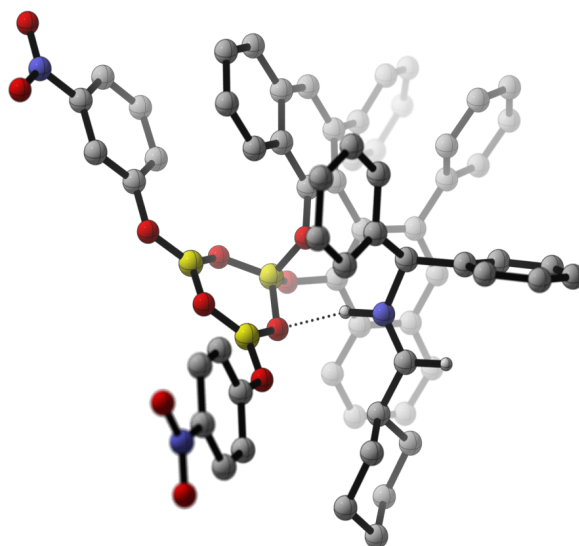

Boroxoinate-H-Iminium Complex **4h**

File Name: catim4h

RRHO Thermochemistry (T = 298)

|                                                     |                             |
|-----------------------------------------------------|-----------------------------|
| Zero-point correction (RRHO)=                       | 1.060936 (Hartree/Particle) |
| Thermal correction to Energy (RRHO)=                | 1.126019                    |
| Thermal correction to Enthalpy (RRHO)=              | 1.126962                    |
| Thermal correction to Gibbs Free Energy (RRHO)=     | 0.955587                    |
| Sum of electronic and zero-point Energies (RRHO)=   | -3534.333384                |
| Sum of electronic and thermal Energies (RRHO)=      | -3534.268301                |
| Sum of electronic and thermal Enthalpies (RRHO)=    | -3534.267358                |
| Sum of electronic and thermal Free Energies (RRHO)= | -3534.438733                |

Quasi-RRHO Thermochemistry (T = 298,  $\nu_0 = 100 \text{ cm}^{-1}$ )

|                                                      |                             |
|------------------------------------------------------|-----------------------------|
| Zero-point correction (QRRHO)=                       | 1.060936 (Hartree/Particle) |
| Thermal correction to Energy (QRRHO)=                | 1.126019                    |
| Thermal correction to Enthalpy (QRRHO)=              | 1.126962                    |
| Thermal correction to Gibbs Free Energy (QRRHO)=     | 0.973137                    |
| Sum of electronic and zero-point Energies (QRRHO)=   | -3534.333384                |
| Sum of electronic and thermal Energies (QRRHO)=      | -3534.268301                |
| Sum of electronic and thermal Enthalpies (QRRHO)=    | -3534.267358                |
| Sum of electronic and thermal Free Energies (QRRHO)= | -3534.421183                |

Quasi-harmonic Thermochemistry (T = 298, cutoff =  $100 \text{ cm}^{-1}$ )

|                                       |                             |
|---------------------------------------|-----------------------------|
| Zero-point correction (QHO)=          | 1.060936 (Hartree/Particle) |
| Thermal correction to Energy (QHO)=   | 1.126362                    |
| Thermal correction to Enthalpy (QHO)= | 1.126962                    |

|                                                    |              |
|----------------------------------------------------|--------------|
| Thermal correction to Gibbs Free Energy (QHO)=     | 0.976575     |
| Sum of electronic and zero-point Energies (QHO)=   | -3534.333384 |
| Sum of electronic and thermal Energies (QHO)=      | -3534.267958 |
| Sum of electronic and thermal Enthalpies (QHO)=    | -3534.267358 |
| Sum of electronic and thermal Free Energies (QHO)= | -3534.417745 |

|   |            |            |            |   |            |            |            |
|---|------------|------------|------------|---|------------|------------|------------|
| C | 4.1170950  | -0.1052960 | 1.9629110  | C | -0.9546370 | 6.8147430  | -1.2874870 |
| C | 4.6445070  | -0.6451520 | 0.7831670  | C | -0.1752700 | 5.7265480  | -1.6633180 |
| C | 6.0276810  | -0.8489320 | 0.7053710  | C | -0.7220130 | 4.4530230  | -1.7970170 |
| C | 6.8588030  | -0.5240730 | 1.7719500  | O | -3.2849260 | -1.6093270 | -0.9901320 |
| C | 6.3216010  | 0.0105530  | 2.9403680  | C | -4.5613250 | -1.5687200 | -0.5241100 |
| C | 4.9467920  | 0.2179140  | 3.0318080  | C | -5.0404960 | -0.5369650 | 0.2911800  |
| C | 3.7830350  | -1.0345340 | -0.3688960 | C | -6.3343030 | -0.6045990 | 0.7880930  |
| C | 2.7140650  | -0.2050510 | -0.8543340 | C | -7.1266260 | -1.6999690 | 0.4665010  |
| C | 1.9263580  | -0.6712290 | -1.9024310 | C | -6.6676040 | -2.7318610 | -0.3438800 |
| C | 2.1922280  | -1.9240720 | -2.5380030 | C | -5.3756150 | -2.6611240 | -0.8394370 |
| C | 3.2782620  | -2.7108580 | -2.0762740 | O | -0.8658810 | 1.5684240  | -2.0227110 |
| C | 4.0361370  | -2.2485560 | -0.9722030 | N | -0.0481190 | -2.3249200 | 0.5670220  |
| C | 3.5712440  | -3.9311340 | -2.7426740 | C | -0.2267190 | -3.5670090 | 0.3221420  |
| C | 2.8306500  | -4.3320600 | -3.8271780 | C | 0.5419910  | -1.7229370 | 1.7839310  |
| C | 1.7459160  | -3.5425950 | -4.2829680 | C | 1.1238610  | -2.7794080 | 2.7007330  |
| C | 1.4233670  | -2.3694620 | -3.6445310 | C | 0.3744200  | -3.3353450 | 3.7396430  |
| H | 1.1687370  | -3.8710380 | -5.1420460 | C | 0.9248740  | -4.3328120 | 4.5406520  |
| C | 2.4010520  | 1.1382230  | -0.2836820 | C | 2.2254270  | -4.7761490 | 4.3101890  |
| C | 1.0888900  | 1.3690480  | 0.0917080  | C | 2.9763300  | -4.2234400 | 3.2745530  |
| C | 0.6728450  | 2.5802460  | 0.7141000  | C | 2.4265760  | -3.2296350 | 2.4700220  |
| C | 1.6341230  | 3.6059680  | 0.8986870  | C | -0.4737590 | -0.8117760 | 2.4492170  |
| C | 2.9671920  | 3.3792340  | 0.4694790  | C | 0.0121590  | 0.1854460  | 3.2967850  |
| C | 3.3617130  | 2.1915860  | -0.1065320 | C | -0.8651100 | 1.0222870  | 3.9760910  |
| C | -0.6669120 | 2.7808880  | 1.1303210  | C | -2.2414180 | 0.8664240  | 3.8187930  |
| C | -1.0430270 | 3.9791070  | 1.6857380  | C | -2.7309900 | -0.1267210 | 2.9761000  |
| C | -0.0961840 | 5.0200320  | 1.8458780  | C | -1.8512070 | -0.9633530 | 2.2867640  |
| C | 1.2119010  | 4.8351770  | 1.4701190  | H | -4.4072400 | 0.3107480  | 0.5196010  |
| H | -1.3758220 | 1.9631410  | 1.0209160  | H | -6.7335580 | 0.1797580  | 1.4195430  |
| O | 0.1434740  | 0.4279640  | -0.1530070 | H | -7.3181590 | -3.5661840 | -0.5746580 |
| B | -0.2347880 | 0.3353240  | -1.5848640 | H | -4.9785080 | -3.4423210 | -1.4788050 |
| O | 0.9224490  | 0.0724890  | -2.4128740 | H | -3.9398220 | 5.1834640  | -0.9630140 |
| C | 4.7701310  | 2.0605490  | -0.5651820 | H | -0.5449670 | 7.8102510  | -1.1773990 |
| C | 5.8143800  | 2.4888610  | 0.2622060  | H | 0.8845400  | 5.8649310  | -1.8501820 |
| C | 7.1384850  | 2.3787400  | -0.1489000 | H | -0.0996500 | 3.6142960  | -2.0793070 |
| C | 7.4400700  | 1.8381800  | -1.3966890 | H | -0.4100110 | 5.9683990  | 2.2715710  |
| C | 6.4071200  | 1.4188200  | -2.2334090 | H | 1.9419850  | 5.6303680  | 1.5981190  |
| C | 5.0822710  | 1.5309900  | -1.8231110 | H | 3.6882340  | 4.1871850  | 0.5649100  |
| O | -1.1912520 | -0.8016960 | -1.5955060 | H | 5.5821470  | 2.8704150  | 1.2527360  |
| B | -2.4800300 | -0.5192220 | -1.3036360 | H | 7.9363340  | 2.7003560  | 0.5140400  |
| O | -2.9861960 | 0.7550150  | -1.3023240 | H | 8.4734050  | 1.7461070  | -1.7173720 |
| B | -2.1339980 | 1.8019180  | -1.6544250 | H | 6.6322310  | 1.0082330  | -3.2131680 |
| O | -2.7159940 | 3.0480330  | -1.5830990 | H | 4.2806590  | 1.2112930  | -2.4825020 |
| C | -2.0828740 | 4.2553010  | -1.5356200 | H | 6.4550600  | -1.2220690 | -0.2209750 |
| C | -2.8870880 | 5.3308970  | -1.1673100 | H | 7.9308210  | -0.6720200 | 1.6820530  |
| C | -2.3023990 | 6.5829580  | -1.0513410 | H | 6.9691770  | 0.2692620  | 3.7724740  |

|   |            |            |            |   |            |            |            |
|---|------------|------------|------------|---|------------|------------|------------|
| H | 4.5167440  | 0.6332480  | 3.9382920  | C | -2.2111560 | -4.7065740 | -0.5853440 |
| H | 3.0500500  | 0.0829960  | 2.0390070  | H | -1.0123540 | -3.2154300 | -1.6060070 |
| H | 4.8364500  | -2.8775470 | -0.5901060 | C | -0.5713530 | -5.6442940 | -2.8587740 |
| H | 4.4045790  | -4.5321300 | -2.3878670 | H | 0.2721890  | -5.9123550 | -0.8855940 |
| H | 3.0736160  | -5.2578580 | -4.3400520 | H | 1.0452050  | -4.6266020 | -1.8265060 |
| H | 1.3545710  | -1.1016680 | 1.3901380  | C | -2.8535740 | -5.2623660 | -1.8578310 |
| H | -0.3528300 | -1.6393590 | -0.1481930 | H | -2.0558800 | -5.5209140 | 0.1359810  |
| H | 0.0924700  | -4.2793560 | 1.0842090  | H | -2.8652200 | -3.9644880 | -0.1152930 |
| H | -0.6335320 | -2.9769180 | 3.9295550  | C | -1.9344940 | -6.2692850 | -2.5544340 |
| H | 3.0082300  | -2.7964030 | 1.6587560  | H | 0.0927770  | -6.3751880 | -3.3260830 |
| H | -2.2521890 | -1.7337110 | 1.6303800  | H | -0.6967130 | -4.8235390 | -3.5767640 |
| H | 1.0856930  | 0.3044000  | 3.4247020  | H | -3.8142460 | -5.7270730 | -1.6100610 |
| H | -2.0708740 | 4.1336220  | 2.0005750  | H | -3.0623620 | -4.4266180 | -2.5401920 |
| H | 0.5975670  | -1.7505660 | -3.9785580 | H | -2.4014830 | -6.6294970 | -3.4766110 |
| H | -0.4740650 | 1.8037560  | 4.6195810  | H | -1.7974980 | -7.1427910 | -1.9024460 |
| H | -2.9282010 | 1.5180210  | 4.3494080  | N | -3.1527650 | 7.7108950  | -0.6482180 |
| H | -3.8015350 | -0.2627950 | 2.8567210  | N | -8.4869860 | -1.7715390 | 1.0001000  |
| H | 3.9927360  | -4.5594740 | 3.0965420  | O | -4.3330080 | 7.4907200  | -0.4391080 |
| H | 2.6554200  | -5.5478570 | 4.9408360  | O | -2.6301720 | 8.8070670  | -0.5422540 |
| H | 0.3397530  | -4.7573210 | 5.3501240  | O | -8.8671670 | -0.8593430 | 1.7136180  |
| C | -0.8502810 | -4.0622120 | -0.9270420 | O | -9.1634560 | -2.7418010 | 0.7039770  |
| C | 0.0823890  | -5.0912980 | -1.5921490 |   |            |            |            |

### **Electrostatic Potential Slice Maps:**

Optimizations of catalyst-borox-iminium complexes were carried out at the M06-2X/6-31G\* level of theory as implemented by the Gaussian 16 software package with bulk solvent effects accounted for with the self-consistent reaction field polarizable continuum model (PCM) as implemented for toluene. Electrostatic slice maps were generated from NPA charges calculated from these optimized structures using the *cubegen* function provided by Gaussian 16. These were plotted in Jmol to create the colored-in field representing charge such that the outer edges of the map would have a neutral (green) charge using the commands below. The coordinates in brackets following “isosurface plane” represent the plane containing the (im)N—H—O(cat) interaction between the catalyst and the substrate. The coloring gradient was kept consistent between derivatives for accurate qualitative comparison.

NO2 derivative:

```
isosurface plane {0.53651 -1.53177 1.48689}{-0.01663 -1.26501 0.65245}{-1.20492 -0.69855
-0.75211} color absolute -0.16 0.08 map "C:/<full path to cube
file>/M06catnitimphen_ESP_potential.cube" translucent;show isosurface
```

Ph derivative:

```
isosurface plane {-0.71944 -2.04082 0.79600}{-1.62233 0.10086 -0.64239}{-1.02183 -1.29391  
0.11814} color absolute -0.16 0.08 map C:/<full path to cube file>/M06cathexSP-  
NPA_redo_Pot.cube" translucent;show isosurface
```

### **Quantitative Electrostatic Potential Data:**

Quantitative ESP data was collected by feeding G16 a grid (using the prop=grid keyword) in a fort.52 file that consisted of the coordinates of the substrate, while the catalyst structure was kept in the main input file. The following line was included after the input coordinates to trap the calculated ESP data for the complex in a fort.99 file: "39 2 52 99", where 39 is the atom count in the fort.52 file, 52 is the designation of the input file (i.e. telling G16 that fort.52 is the input for the grid), and 99 designates the output file for ESP data. An example input file and job file are included below, as well as the quantitative ESP data spreadsheet. Charges on the substrate were calculated with the pop=NPA command in a separate single-point calculation.

Example G16 input file:

```
%chk=M06catnitimphen_ESP.chk  
#p M062x/6-311+G** scrf=(pcm,solvent=toluene) nosym prop=grid integral=ultrafine  
wulff chemzyme catalyst cyclohexyl substituent with imine phenyl complex gen  
  
-1 1  
C 4.1335 -0.86046 1.10584  
C 4.42999 -1.14799 -0.23359  
.  
.  
.  
O -4.26489 8.62025 -1.53235  
O -2.31637 8.46785 -0.62261  
  
39 2 52 99
```

Example job file (note the paths should correspond to your filesystem):

```
#!/bin/bash  
#SBATCH --job-name=M06catnitimphen_ESP  
#SBATCH --output=M06catnitimphen_ESP.o%j  
#SBATCH --error=M06catnitimphen_ESP.e%j  
#SBATCH --partition=Standard  
#SBATCH --nodes=1  
#SBATCH --ntasks-per-node=16  
#SBATCH --export=ALL  
#SBATCH -t 48:00:00  
#SBATCH --mem=32GB  
set -x
```

```

module add Gaussian
export OMP_NUM_THREADS=16
export GAUSS_SCRDIR=/data/home/$USER/scratch/$SLURM_JOBID
mkdir -p $GAUSS_SCRDIR
trap "rm -r $GAUSS_SCRDIR" 0 1 2 3 9 13 14 15
df -lh
. /etc/profile.d/modules.sh
find $SLURM_SUBMIT_DIR -maxdepth 1 -name "fort.*" -exec cp {} . \;
cp $SLURM_SUBMIT_DIR/M06catnitimphen_ESP.chk .
/cm/shared/apps/Gaussian/g09/g09 -m="28GB" -p=16
$SLURM_SUBMIT_DIR/M06catnitimphen_ESP.com $SLURM_SUBMIT_DIR/M06catnitimphen_ESP.log
rm -f Gau* #Clean up any temporary files from crashed job
/cm/shared/apps/Gaussian/g09/formchk M06catnitimphen_ESP.chk
cp M06catnitimphen_ESP.chk $SLURM_SUBMIT_DIR/.
cp M06catnitimphen_ESP.fchk $SLURM_SUBMIT_DIR/.
find . -maxdepth 1 -name "fort.*" -exec cp {} $SLURM_SUBMIT_DIR/. \;
exit

```

Example fort.52 input file (just coordinates—no atom names):

```

0.53651 -1.53177 1.48689
1.3468 -2.53002 1.43379
.
.
.
3.01265 -2.24314 7.02462
0.94163 -3.42951 6.34637

```

Quantitative ESP data:

| fort.99  | NPA charge<br>substrate | Stab. Energy R <sup>3</sup> =4-NO <sub>2</sub> Ph (kcal/mol) |            | Stab. Energy R <sup>3</sup> =Cy |
|----------|-------------------------|--------------------------------------------------------------|------------|---------------------------------|
| -0.12427 | -0.46035                | 35.9                                                         | <-- N -->  | 36.2                            |
| -0.10437 | 0.28686                 | -18.8                                                        |            | -23.1                           |
| -0.1039  | -0.17778                | 11.6                                                         |            | 3.2                             |
| -0.08787 | -0.13045                | 7.2                                                          |            | 5.5                             |
| -0.07694 | -0.20313                | 9.8                                                          |            | 9.5                             |
| -0.08054 | -0.13634                | 6.9                                                          |            | 7.8                             |
| -0.09661 | -0.19766                | 12.0                                                         |            | 7.4                             |
| -0.11344 | -0.15214                | 10.8                                                         |            | 8.8                             |
| -0.1071  | -0.04099                | 2.8                                                          |            | 10.9                            |
| -0.08079 | -0.09644                | 4.9                                                          |            | 4.4                             |
| -0.0706  | -0.20613                | 9.1                                                          |            | 11.0                            |
| -0.06036 | -0.19401                | 7.3                                                          |            | 9.4                             |
| -0.05708 | -0.18829                | 6.7                                                          |            | 9.0                             |
| -0.06063 | -0.1961                 | 7.5                                                          |            | 9.2                             |
| -0.07271 | -0.19687                | 9.0                                                          |            | 13.0                            |
| -0.09621 | -0.06594                | 4.0                                                          |            | -18.4                           |
| -0.08216 | -0.19566                | 10.1                                                         | H (Cy) --> | -46.0                           |

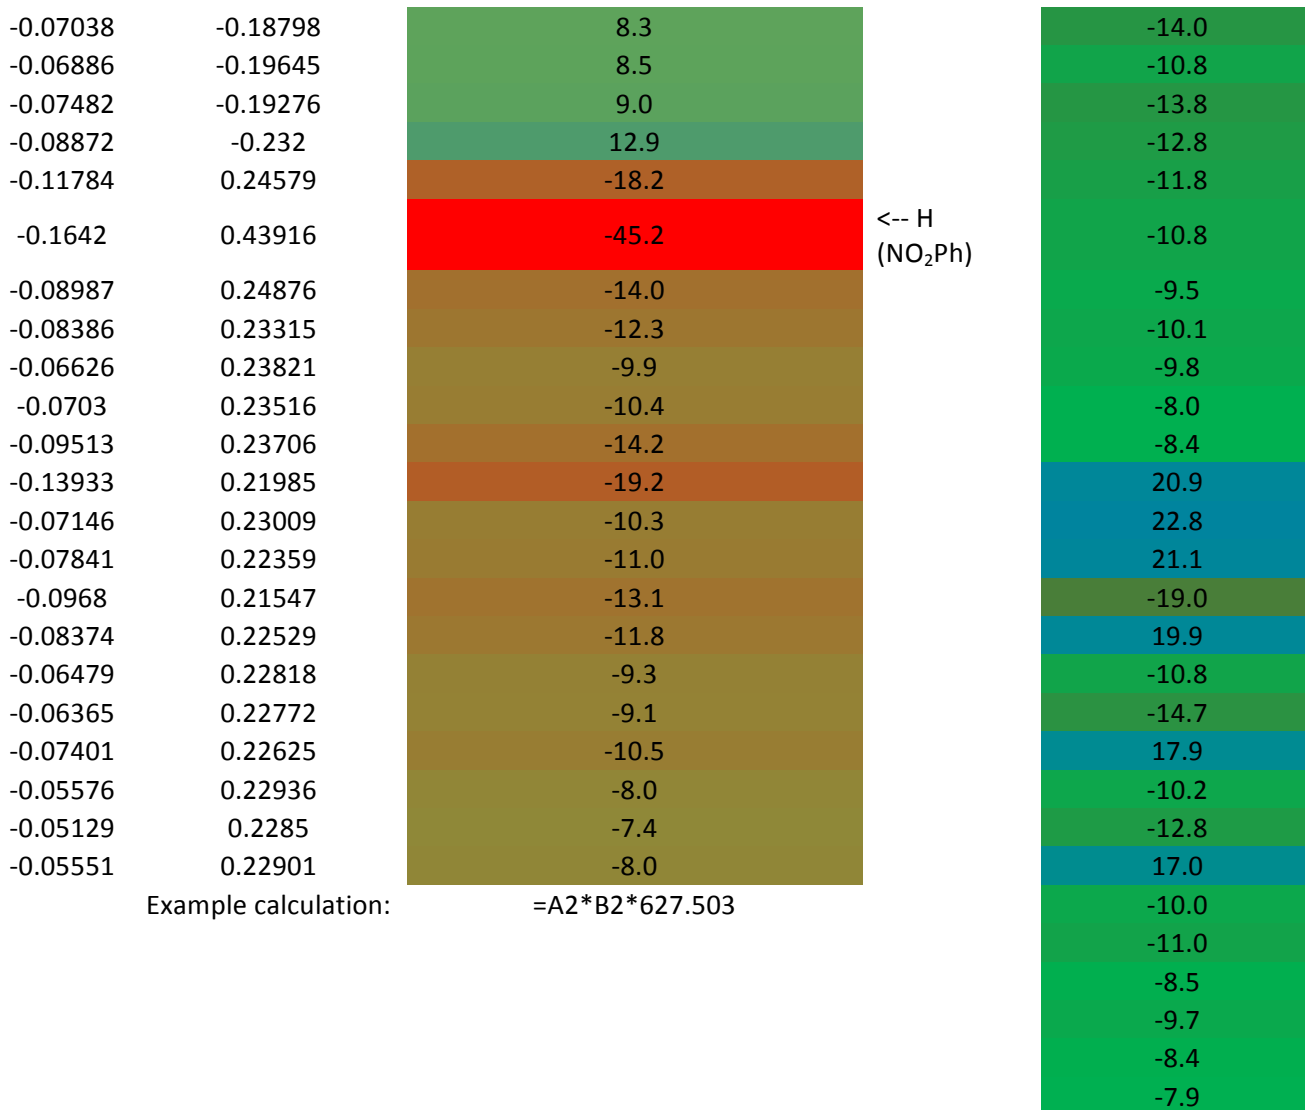

|                          |                            |
|--------------------------|----------------------------|
| Scaling factors for Jmol | Scaling factors (kcal/mol) |
| -0.16                    | -100.40048                 |
| 0.08                     | 50.20024                   |
| Example calculation:     | =L12*627.503               |

Difference in H-bond Stab. Energy =

$$(-46.0 \text{ kcal/mol}) - (-45.2 \text{ kcal/mol}) = -0.8 \text{ kcal/mol}$$

**Catalyst 5,5' substitution analysis:**

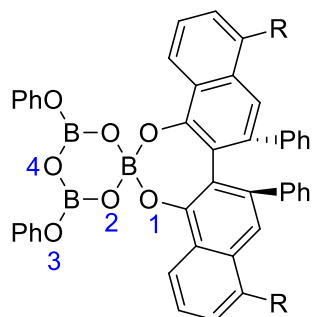

Calculated ADCH charges on numbered oxygens

| Entry | O1       | O2       | O3       | O4       | Substitution    |
|-------|----------|----------|----------|----------|-----------------|
| 1     | -0.22315 | -0.27277 | -0.18776 | -0.24852 | H               |
| 2     | -0.33572 | -0.34204 | -0.30230 | -0.24970 | Me              |
| 3     | -0.33412 | -0.34185 | -0.30119 | -0.24637 | OMe             |
| 4     | -0.32791 | -0.34049 | -0.30028 | -0.34049 | Br              |
| 5     | -0.32980 | -0.33779 | -0.29442 | -0.25586 | Cl              |
| 6     | -0.32538 | -0.34079 | -0.30106 | -0.26235 | CF <sub>3</sub> |

Difference in ADCH charge with respect to R=H

| Entry | O1       | O2       | O3       | O4       | Substitution    |
|-------|----------|----------|----------|----------|-----------------|
| 1     | 0.00000  | 0.00000  | 0.00000  | 0.00000  | H               |
| 2     | -0.11257 | -0.06927 | -0.11455 | -0.00118 | OMe             |
| 3     | -0.11097 | -0.06908 | -0.11343 | 0.00214  | Me              |
| 4     | -0.10476 | -0.06772 | -0.11253 | -0.09197 | Br              |
| 5     | -0.10666 | -0.06502 | -0.10667 | -0.00734 | Cl              |
| 6     | -0.10224 | -0.06802 | -0.11330 | -0.01383 | CF <sub>3</sub> |

ADCH charges were calculated on the numbered oxygens in the BORO ring on the catalyst with various functional group substitutions on the 5,5' positions of the hydrocarbon backbone of the catalyst including methoxy (OMe), methyl (Me), bromo (Br), chloro (Cl), and trifluoromethyl (CF<sub>3</sub>) substitutions. These were first optimized at the M06-2X/6-31G\* level of theory with bulk solvent effects accounted for by the PCM model for toluene included in the Gaussian 16 package. ADCH charges were then calculated using multiwfn from the resulting checkpoint file. A slight decrease in negative charge is observed as the electron withdrawing nature of the substituting group increases for O1, but this trend is not observed for O2, O3, and O4. Since O2 is the oxygen that interacts with the substrate, this suggests that 5,5' substitution should not have a significant effect on the activity of the catalyst.



IV.  $^1\text{H}$  and  $^{13}\text{C}$  spectra for compounds 22a, 22b, 23a, 23b and 41.

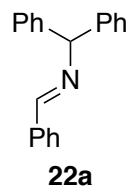

(*E*)-*N*-benzhydryl-1-phenylmethanimine **22a**- $^1\text{H}$  NMR (500 MHz,  $\text{CDCl}_3$ )

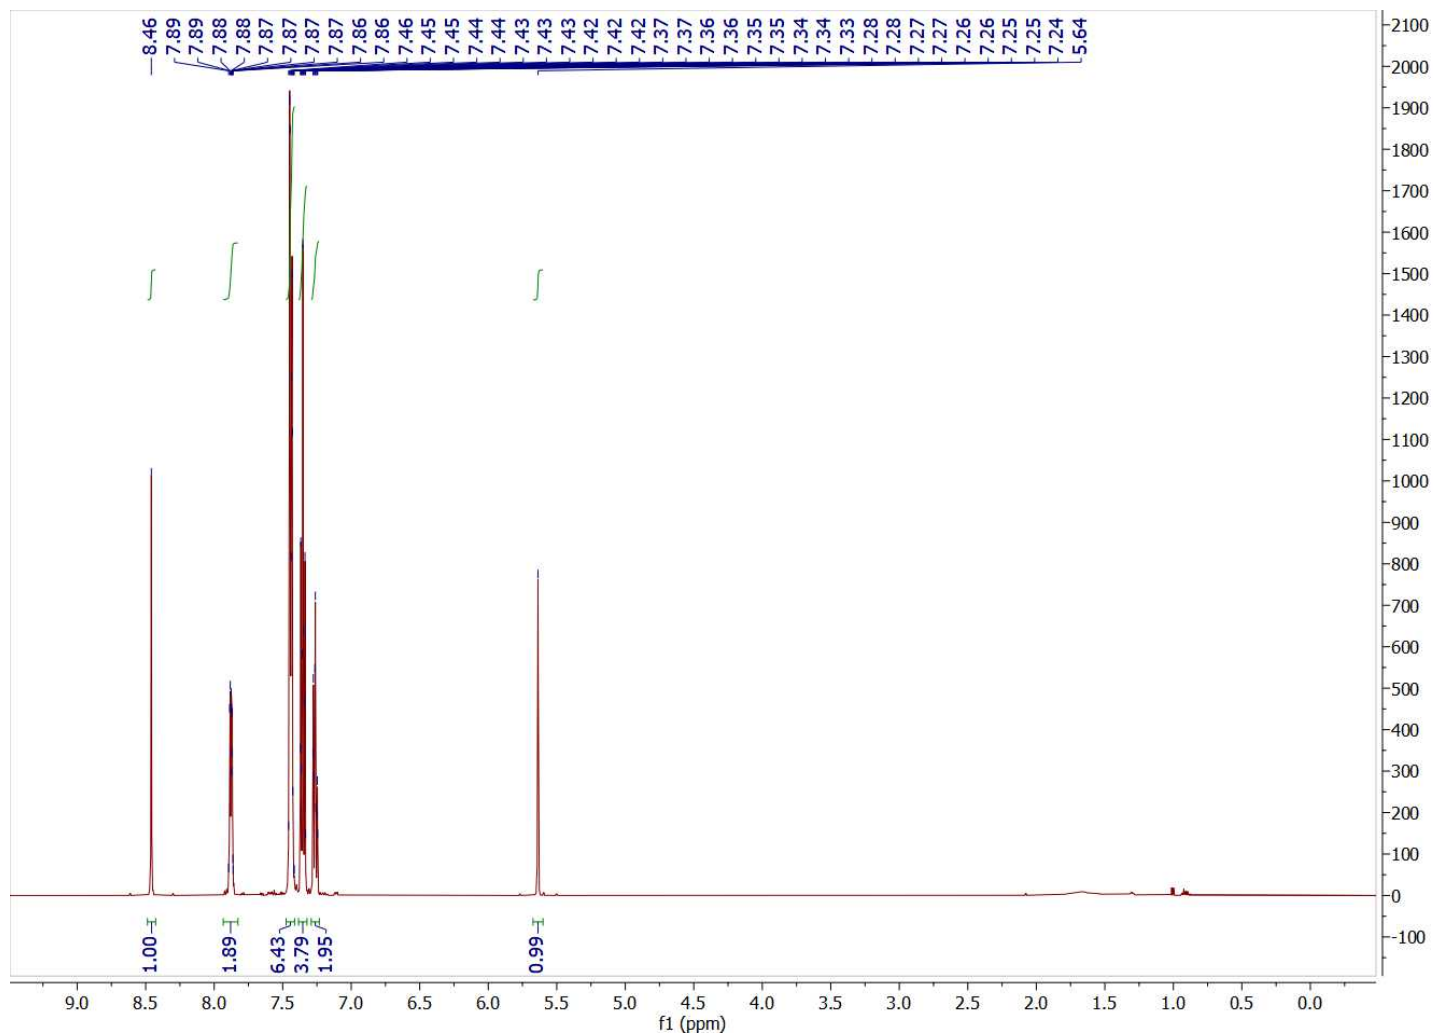

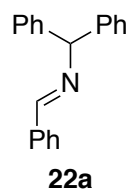

(*E*)-*N*-benzhydryl-1-phenylmethanimine **22a**- $^{13}\text{C}\{^1\text{H}\}$  (126 MHz,  $\text{CDCl}_3$ )

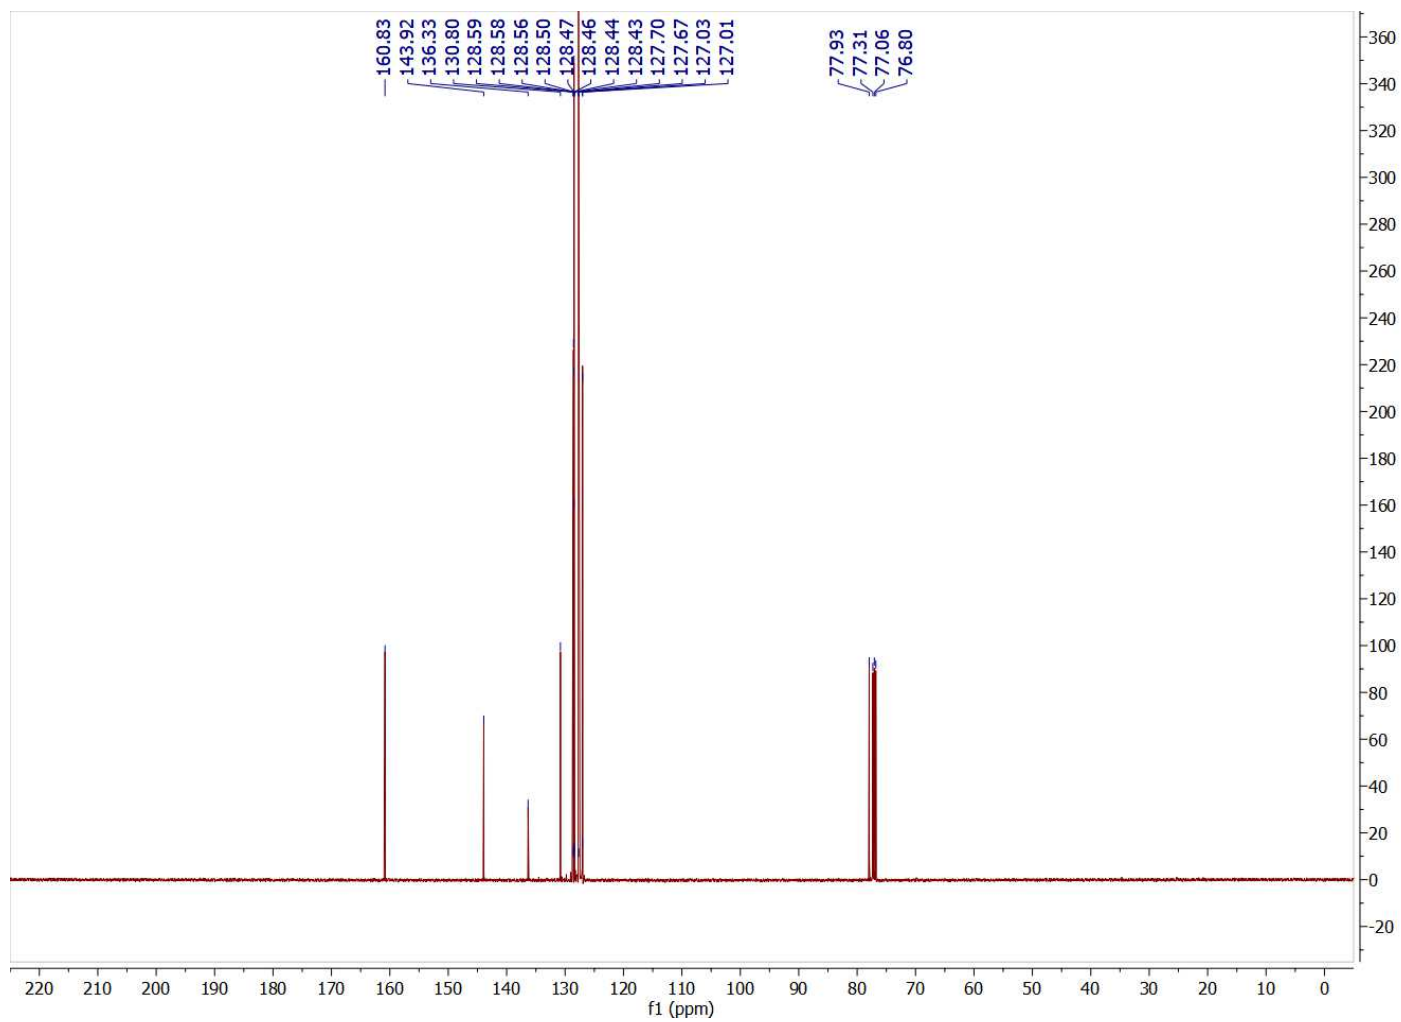

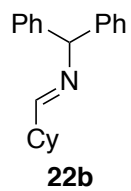

(*E*)-*N*-benzhydryl-1-cyclohexylmethanimine **22b**-<sup>1</sup>H NMR (500 MHz, CDCl<sub>3</sub>)

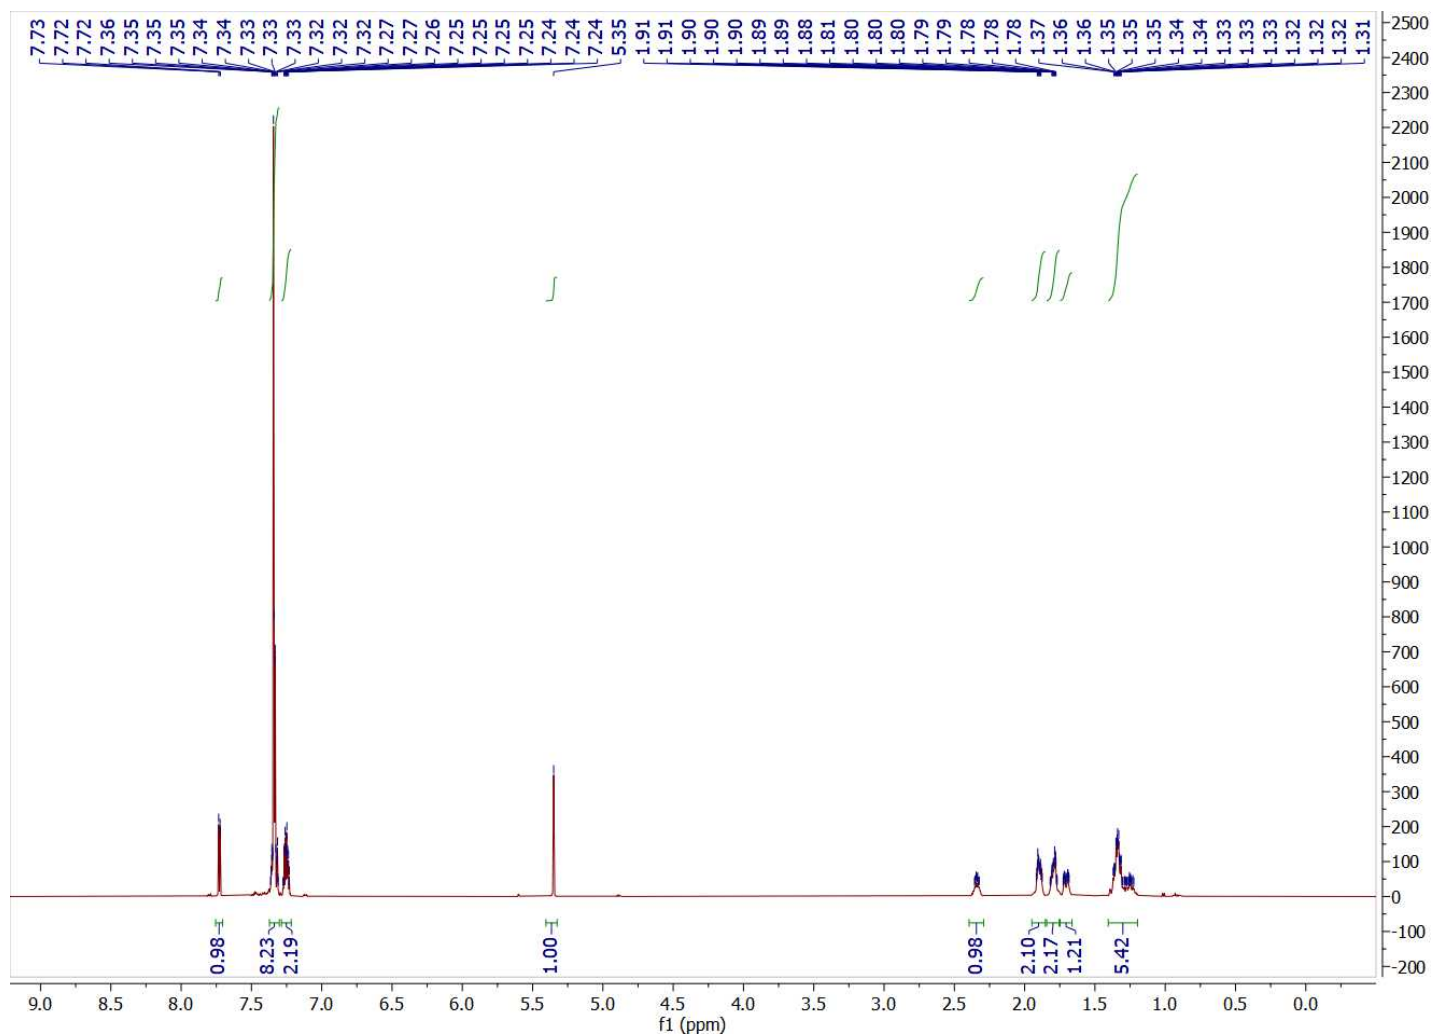

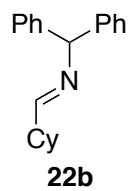

(*E*)-*N*-benzhydryl-1-cyclohexylmethanimine **22b**-<sup>13</sup>C{<sup>1</sup>H} (126 MHz, CDCl<sub>3</sub>)

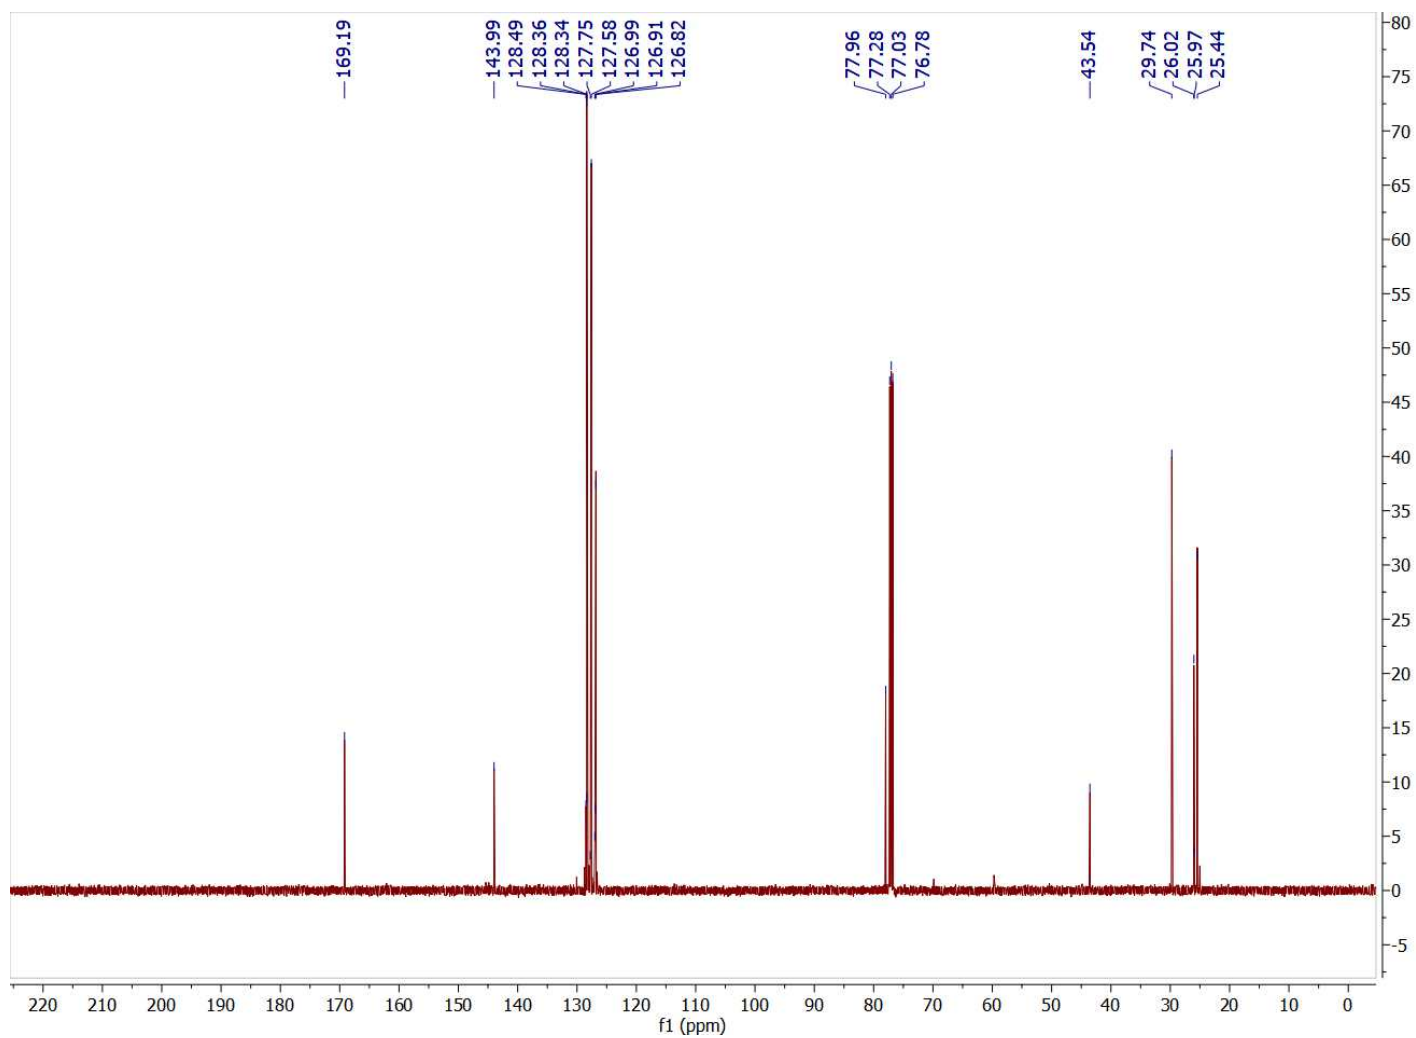

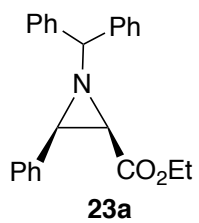

(2*R*,3*R*)-ethyl-1-benzhydryl-3-phenylaziridine-2-carboxylate **23a**-<sup>1</sup>H NMR (500 MHz, CDCl<sub>3</sub>)

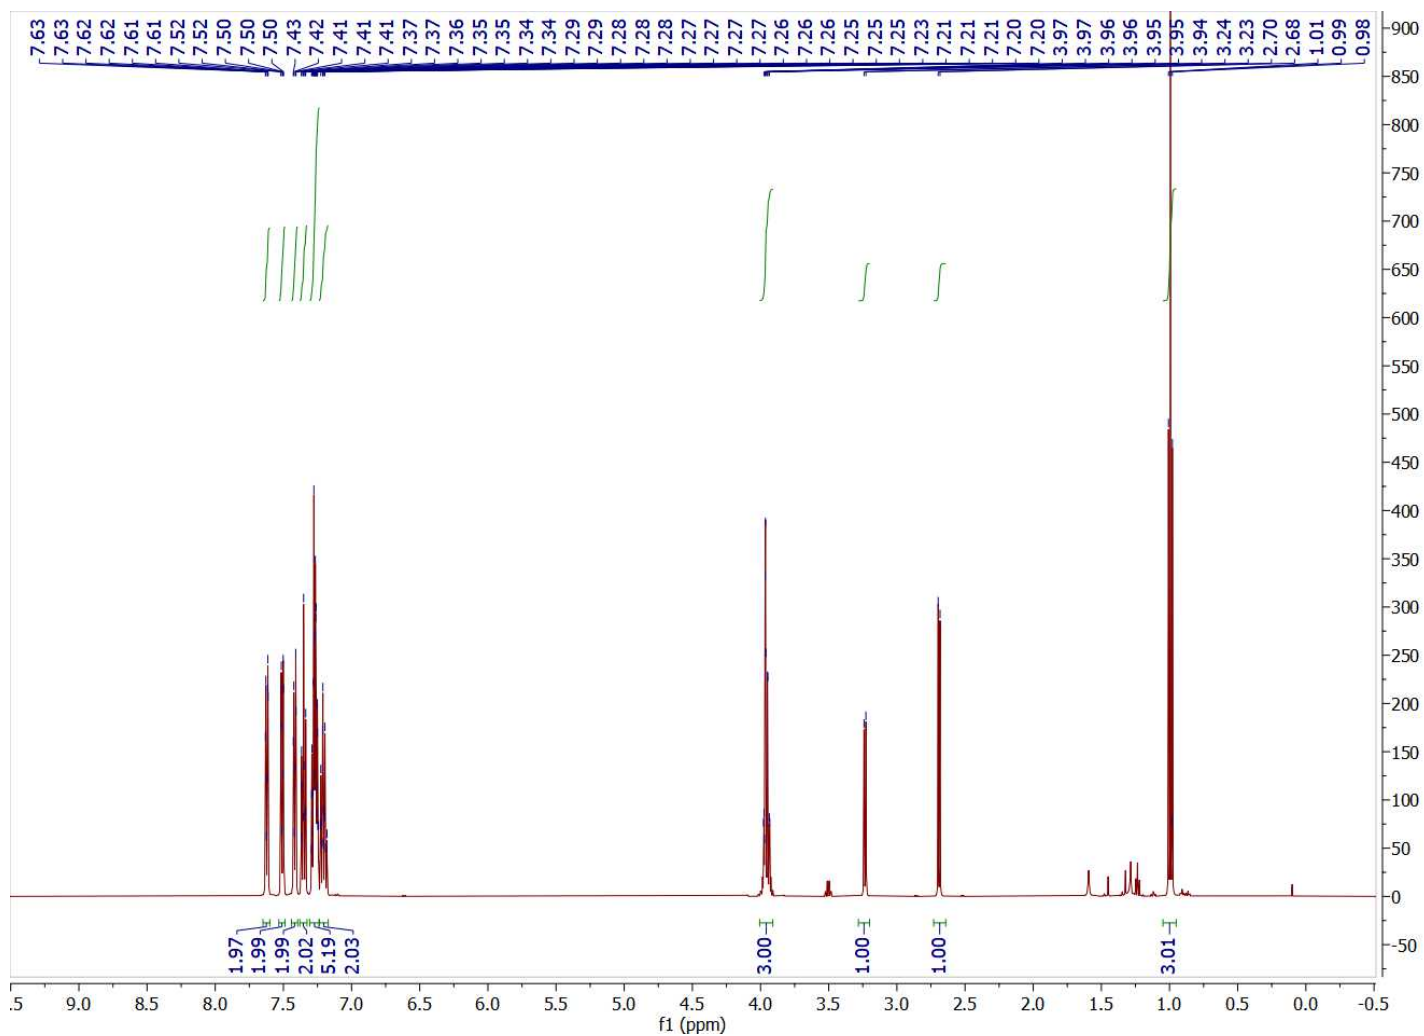

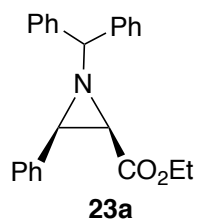

(2*R*,3*R*)-ethyl-1-benzhydryl-3-phenylaziridine-2-carboxylate **23a**-<sup>13</sup>C{<sup>1</sup>H} (126 MHz, CDCl<sub>3</sub>)

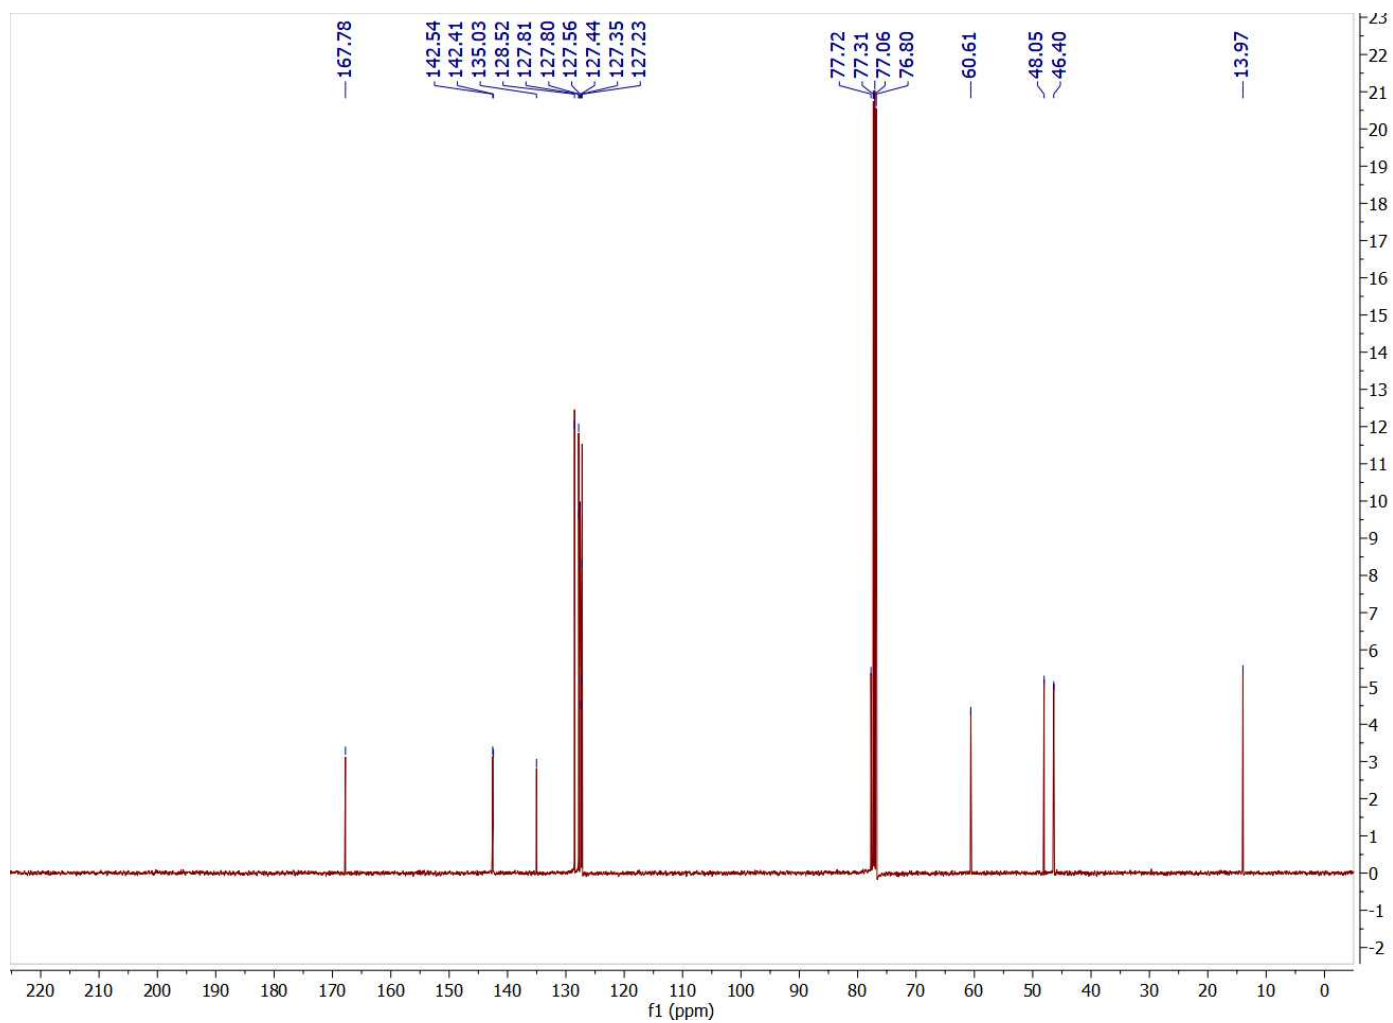

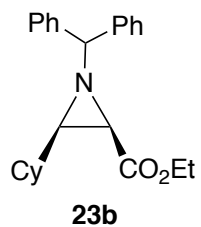

(2*R*,3*R*)-ethyl-1-benzhydryl-3-cyclohexylaziridine-2-carboxylate **23b**-<sup>1</sup>H NMR (500 MHz, CDCl<sub>3</sub>)

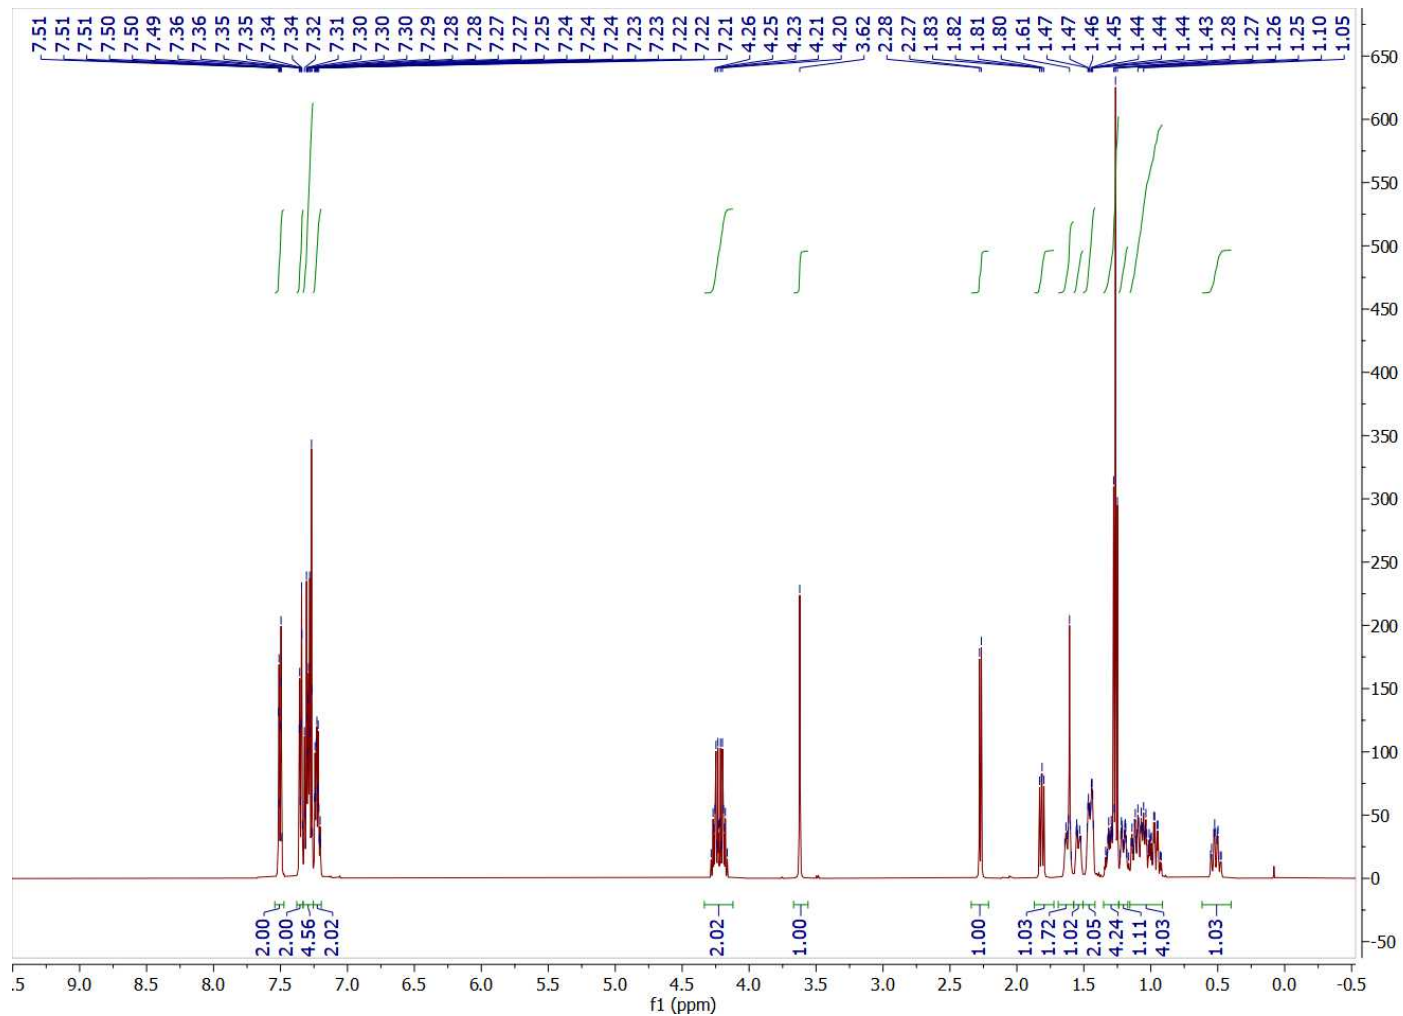

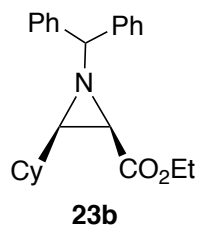

(2*R*,3*R*)-ethyl-1-benzhydryl-3-cyclohexylaziridine-2-carboxylate **23b**- $^{13}\text{C}\{^1\text{H}\}$  (126 MHz,  $\text{CDCl}_3$ )

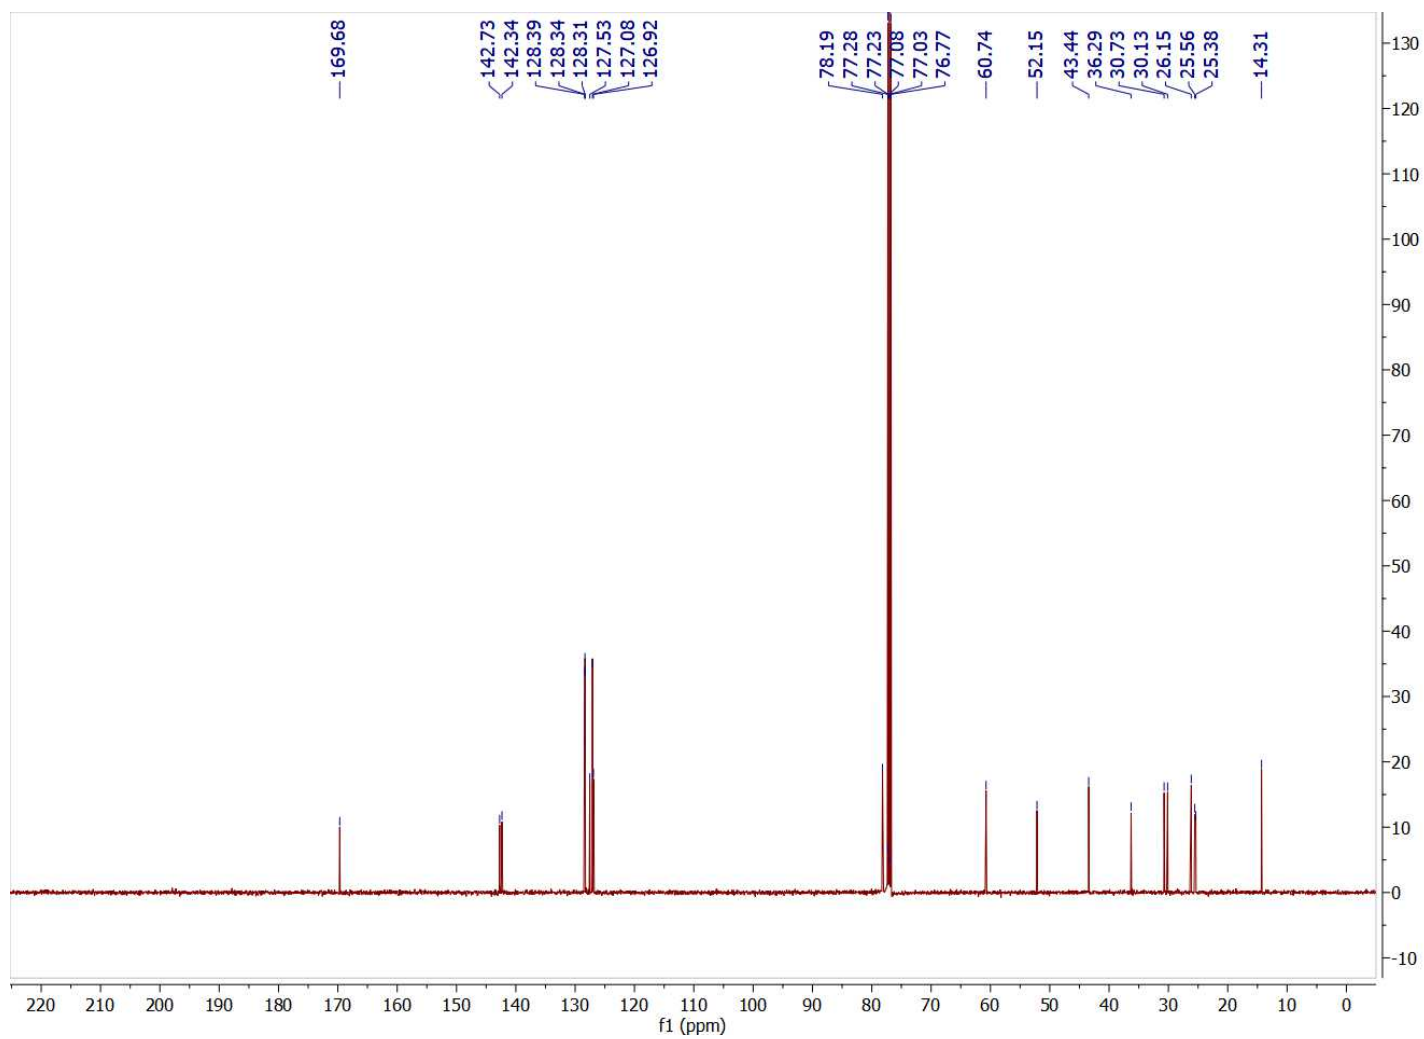



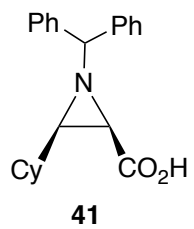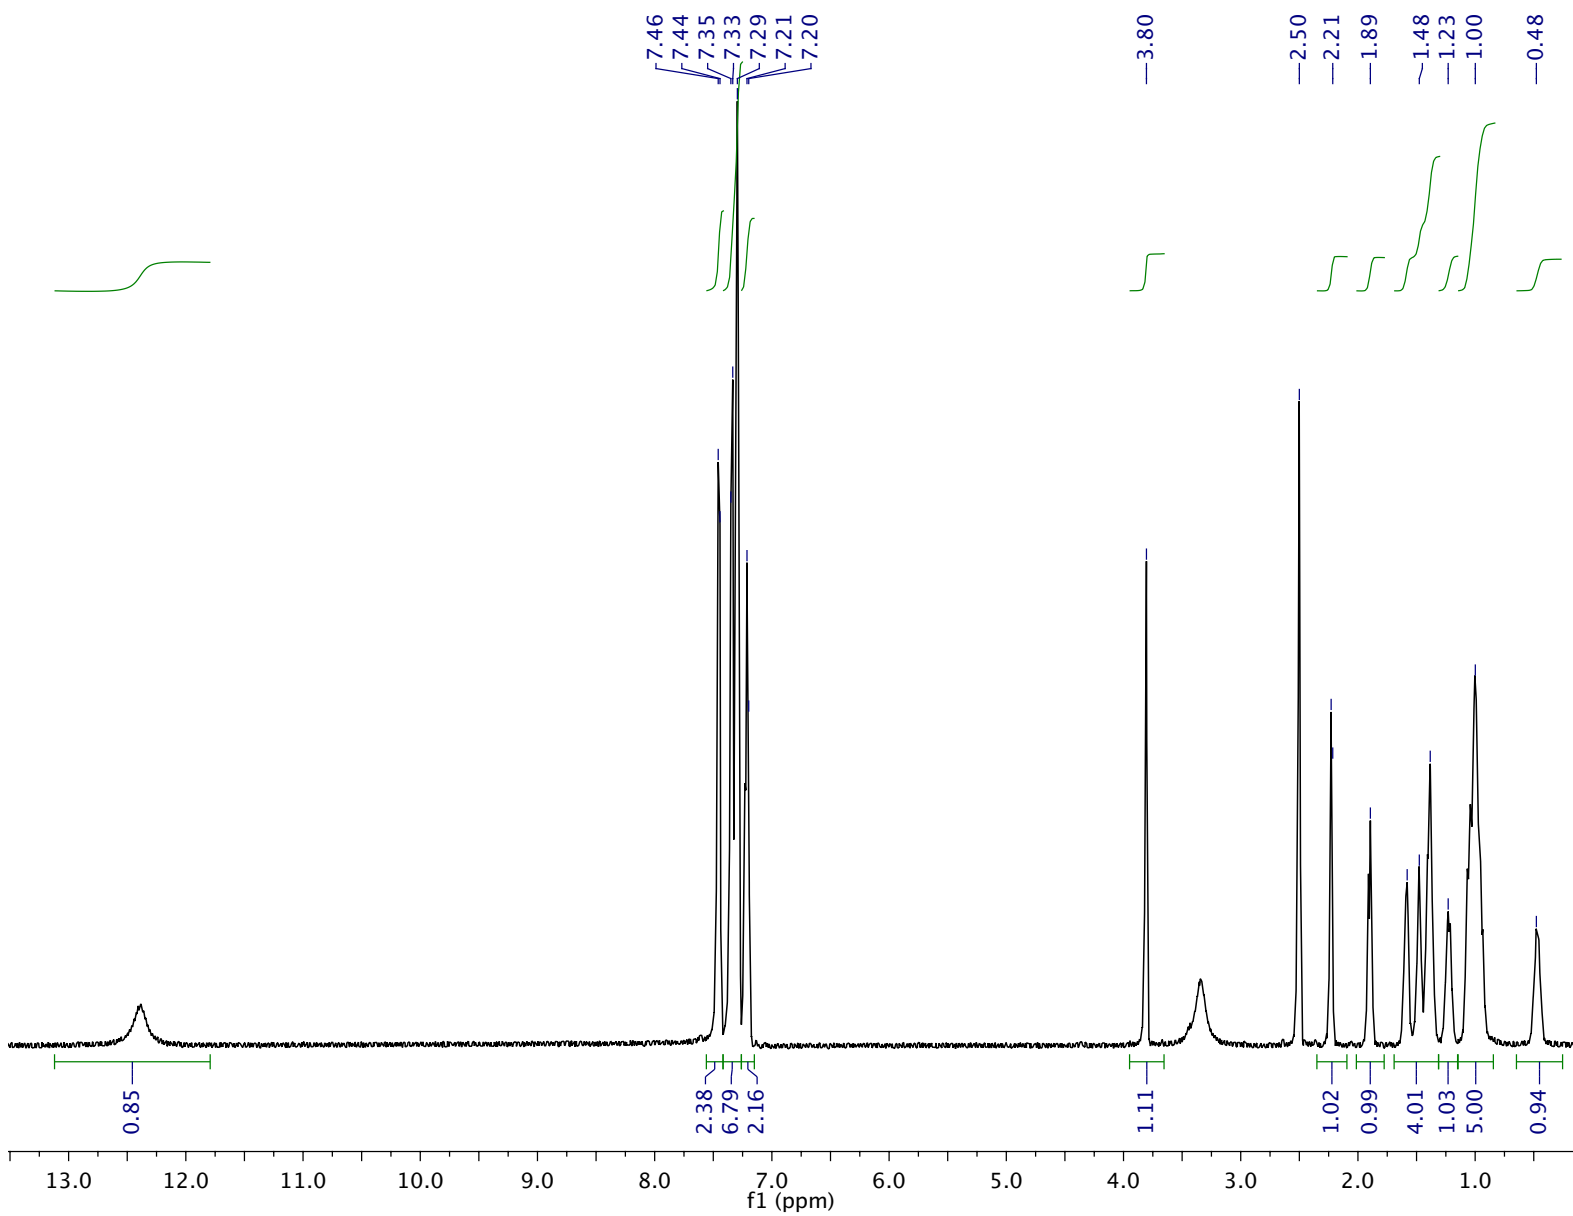

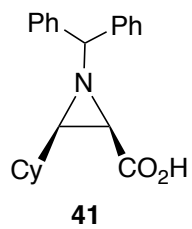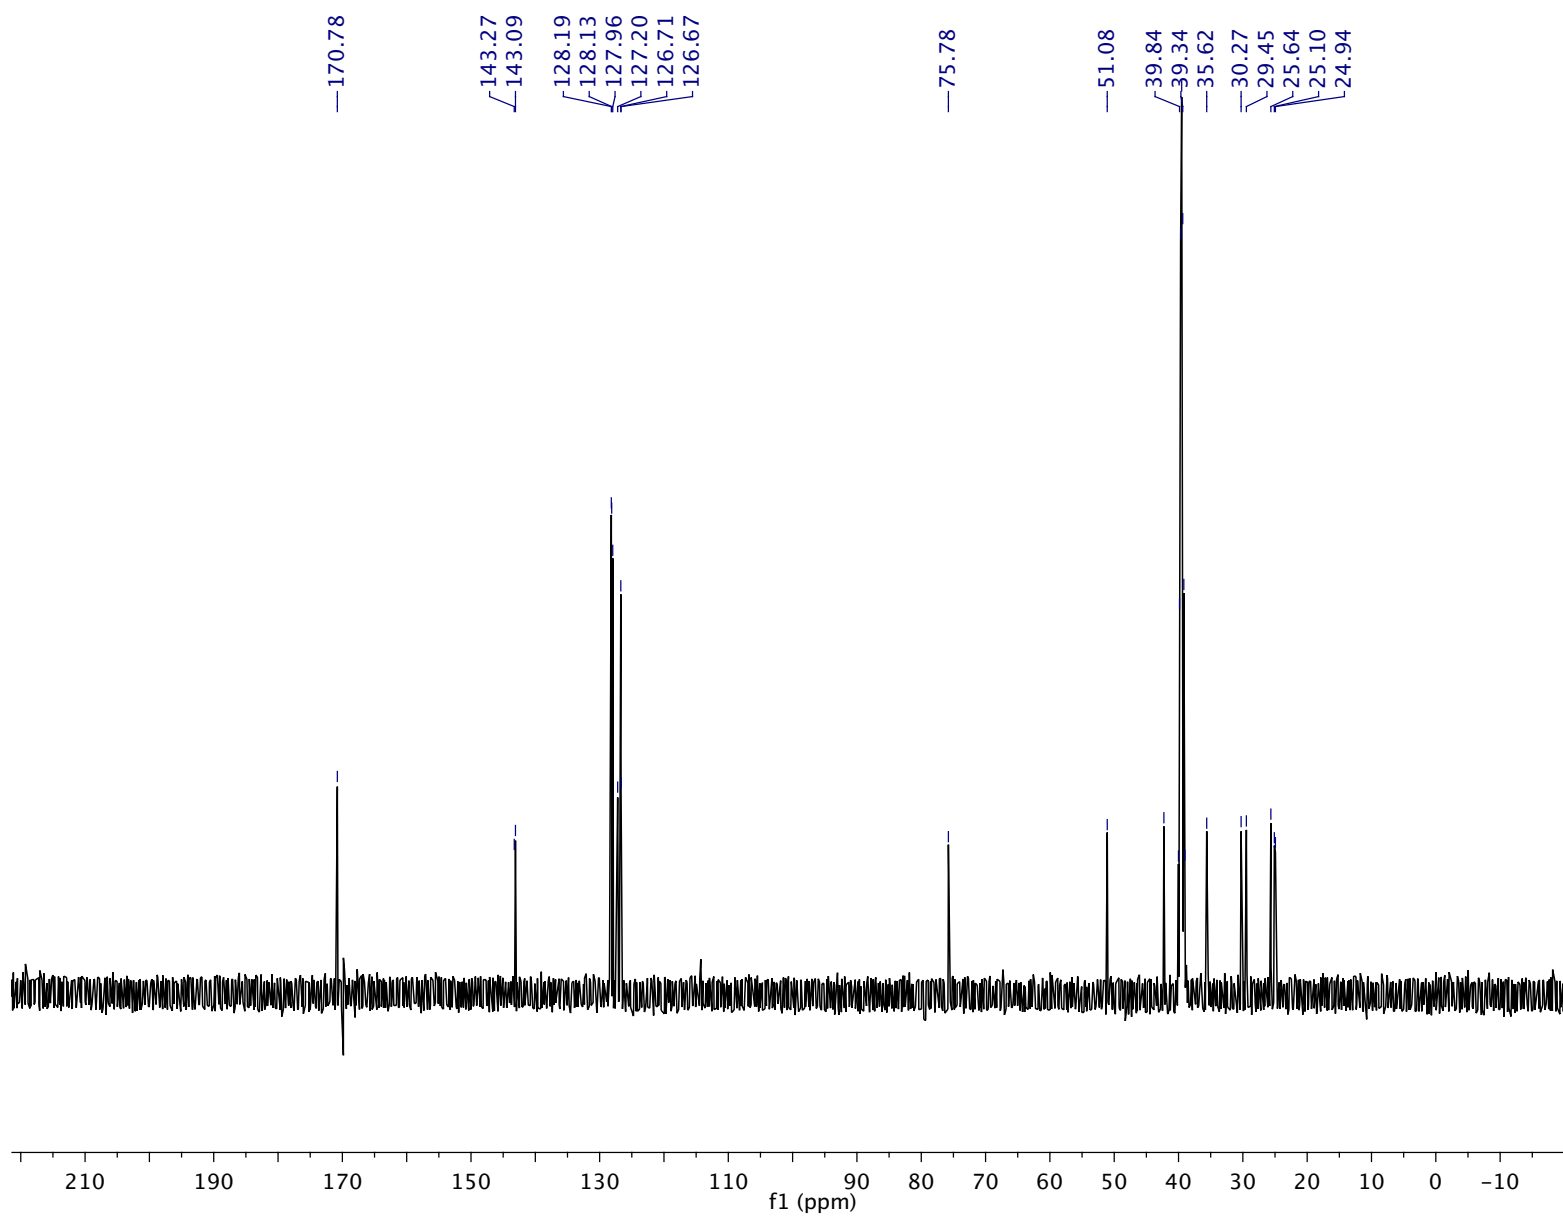

Supplement: NIHMS1902529-supplement-SI.pdf [file NIHMS1902529-supplement-SI.pdf]
